# Supplementary material for: Identification of novel umami molecules via QSAR models and molecular docking
Source: Royal Society of Chemistry journal article supplement (doi:10.1039/d2fo00544a), 2022-01-01

The ligands in the 169 docking results below correspond to the molecules in Table S3. For example, "SR\_1" represents the docking result of sweet taste receptor and the first molecule in Table S3.

SR\_1:

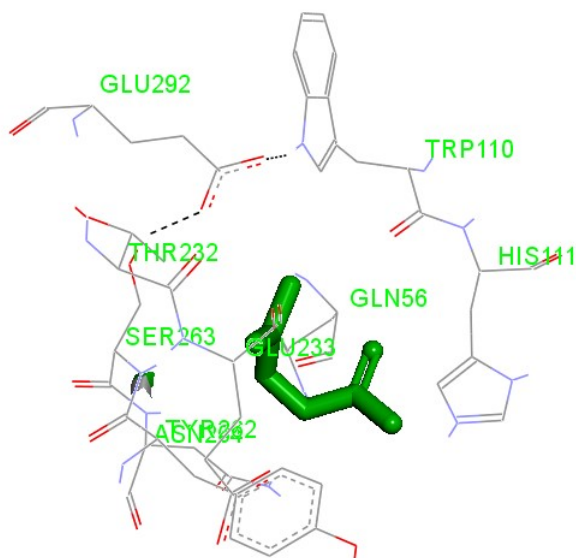

SR\_2:

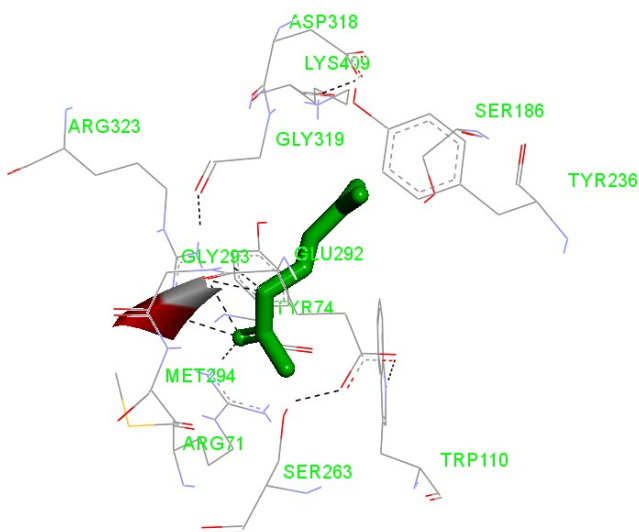

SR\_3:

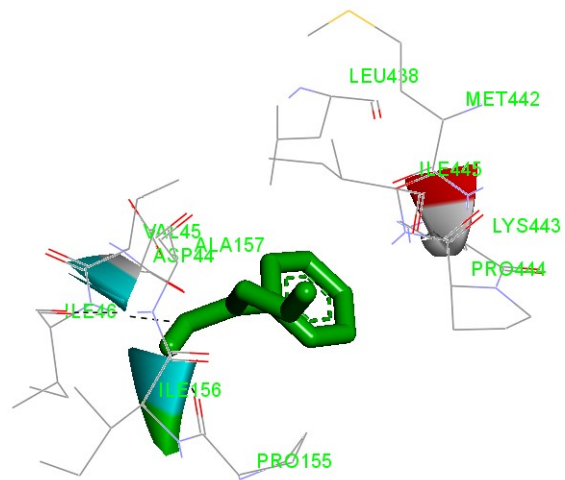

SR\_4:

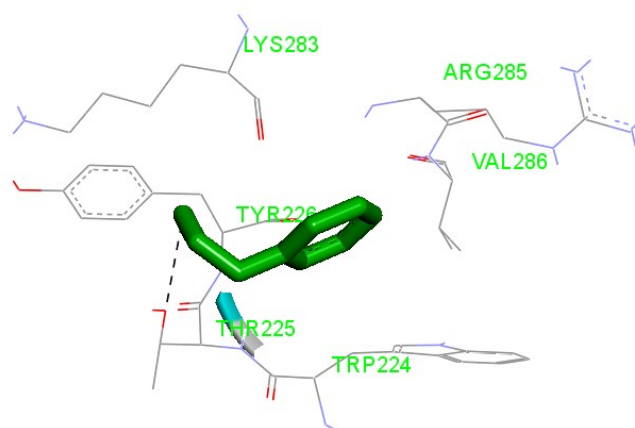

SR\_5:

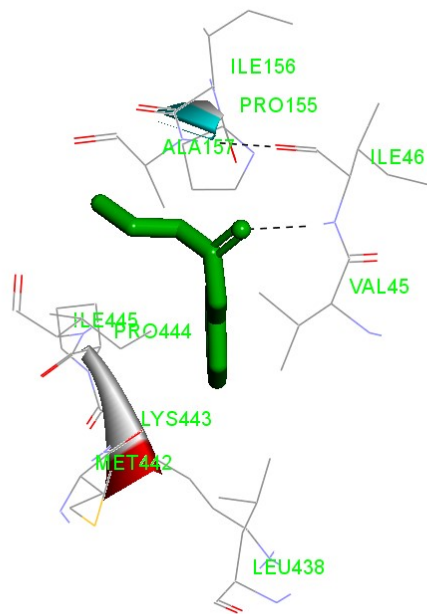

SR\_6:

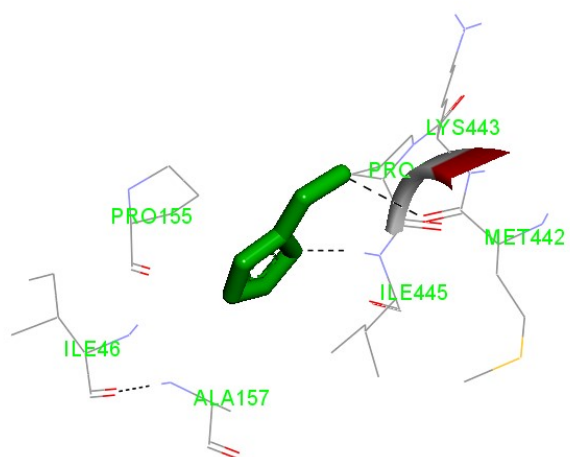

SR\_7:

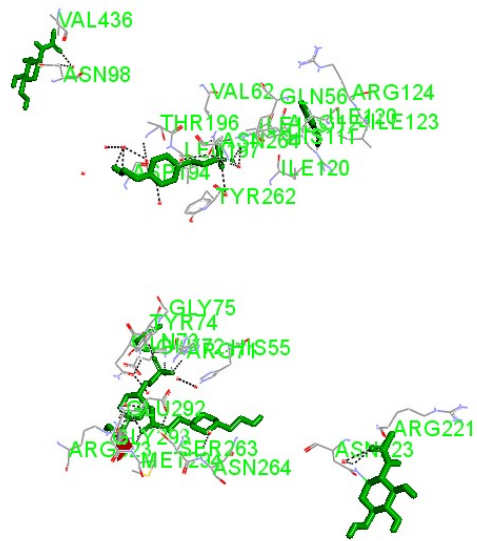

SR\_8:

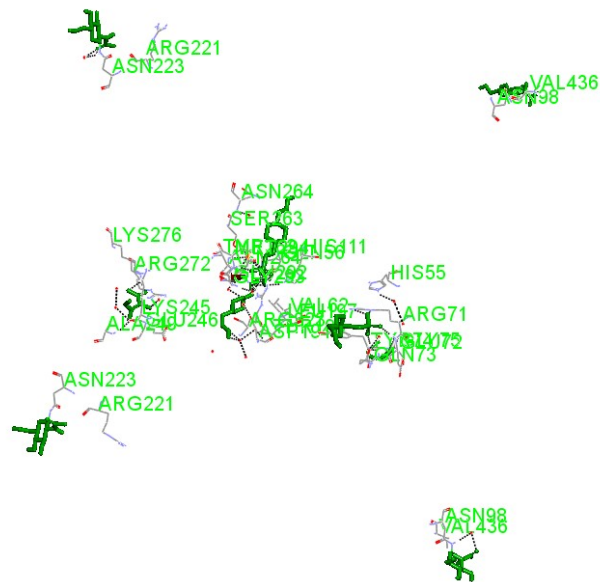

SR\_9:

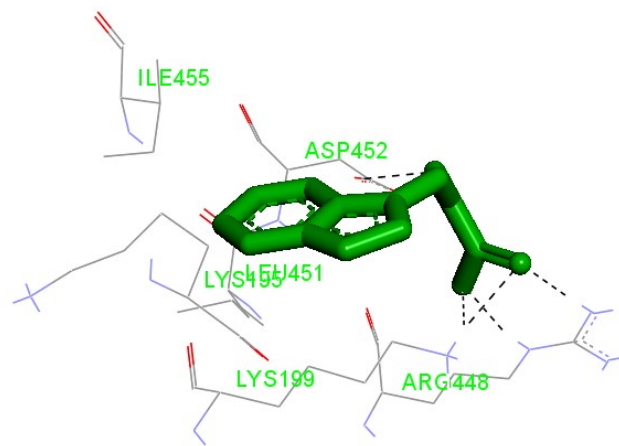

SR\_10:

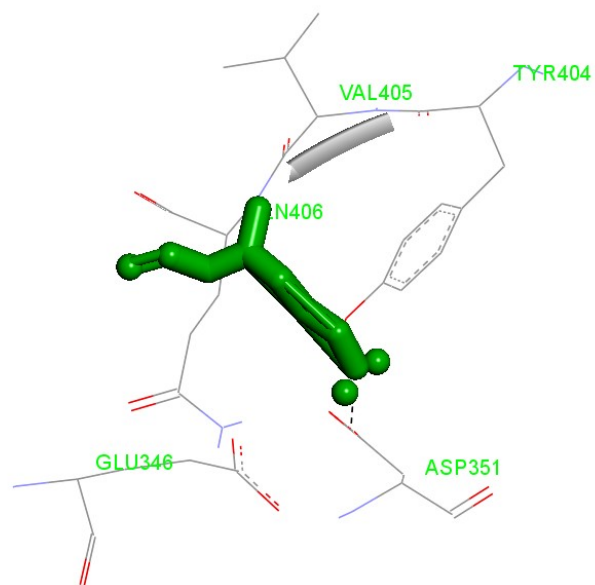

SR\_11:

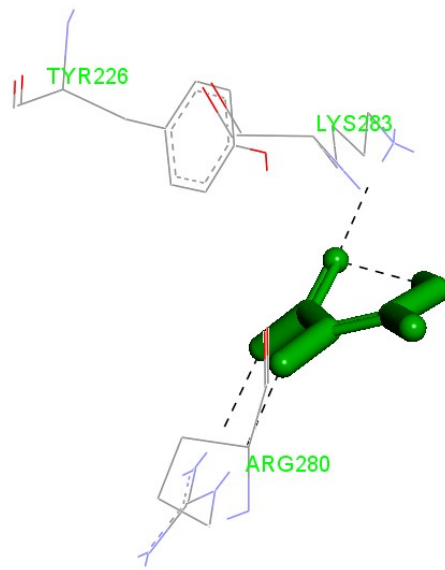

SR\_12:

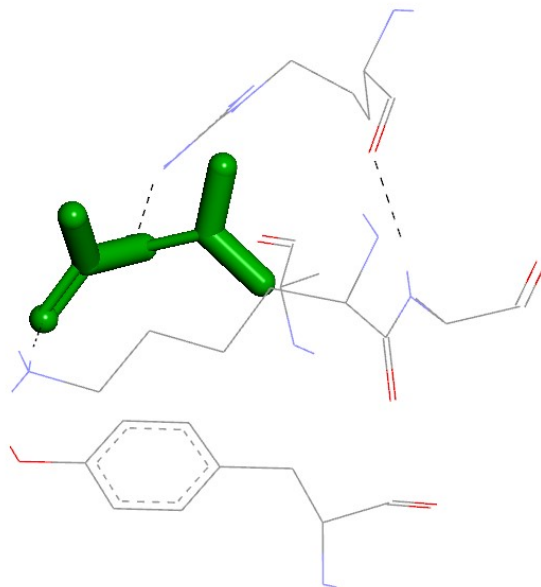

SR\_13:

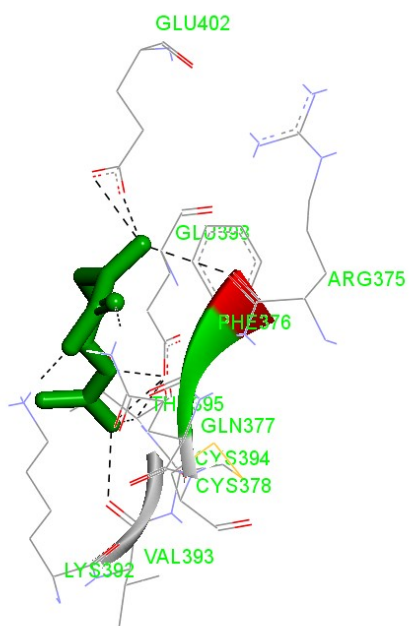

SR\_14:

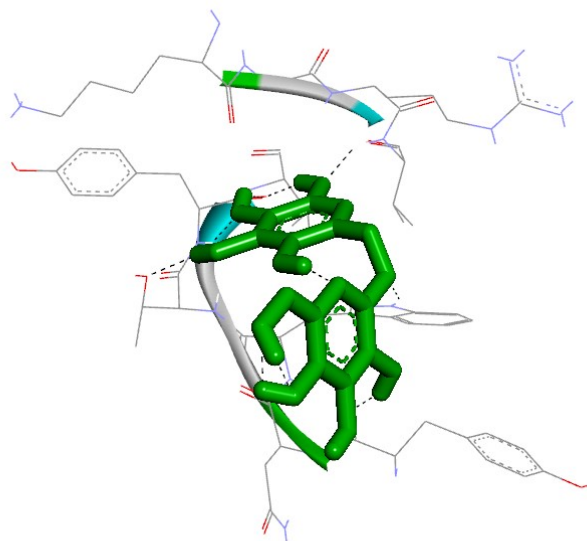

SR\_15:

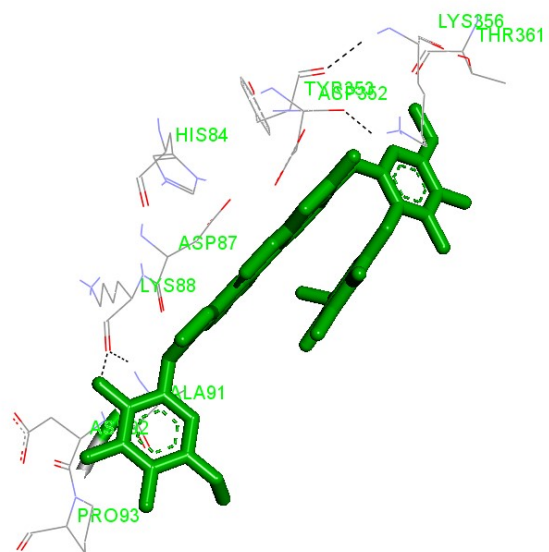

SR\_16:

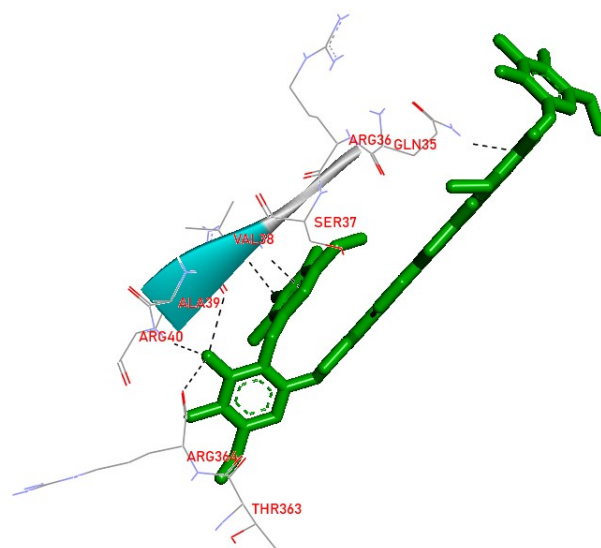





SR\_19:

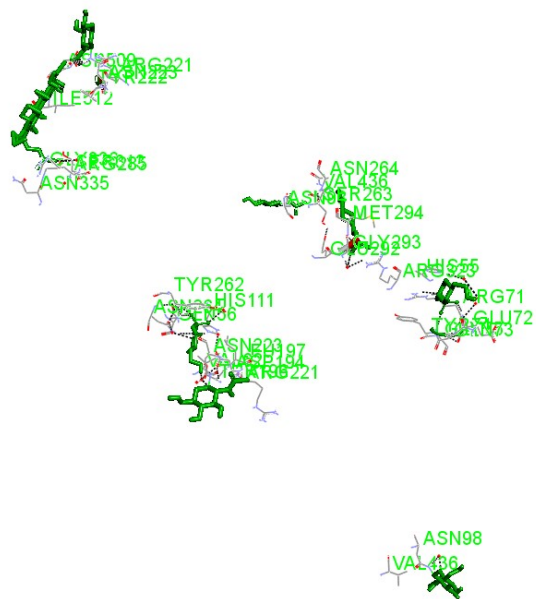

SR\_20:

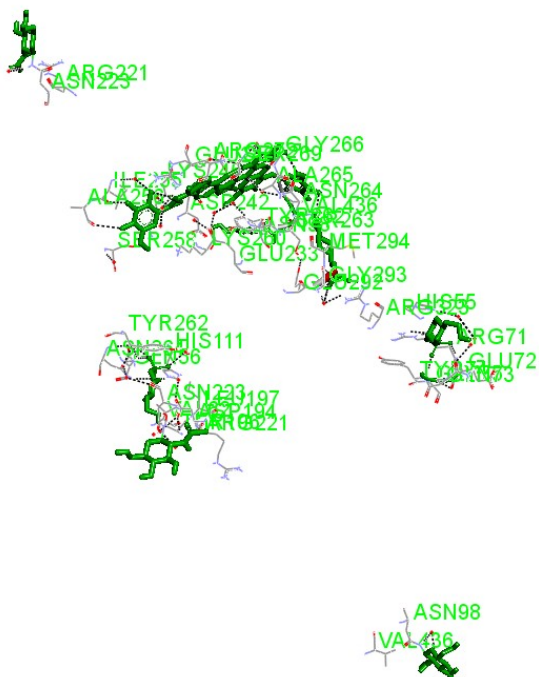

SR\_21:

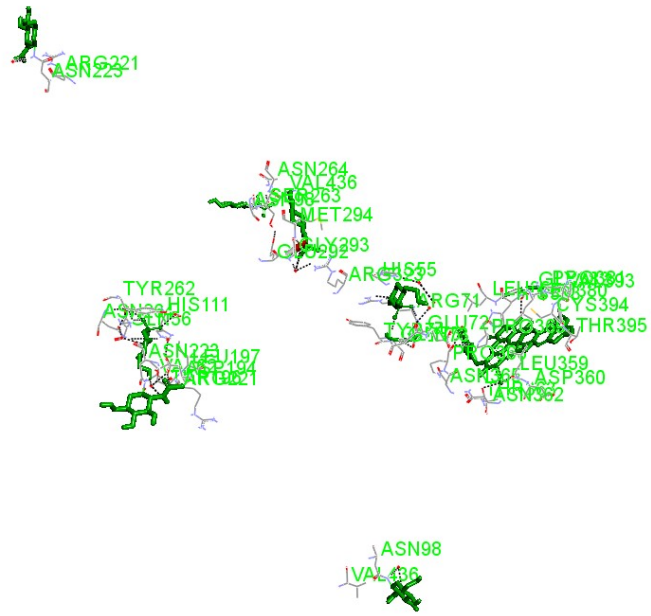

SR\_22:

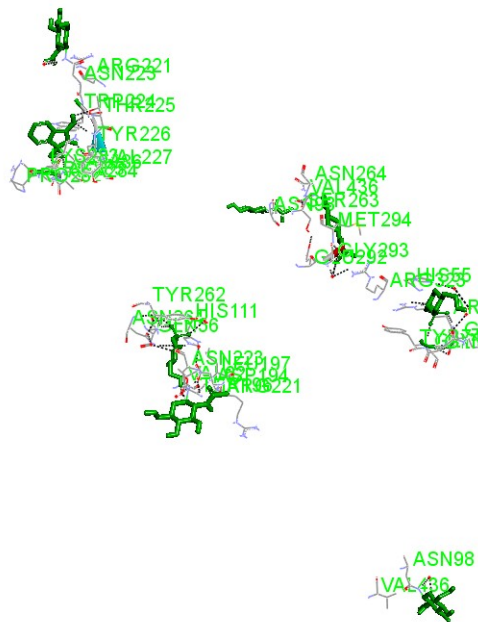

SR\_23:

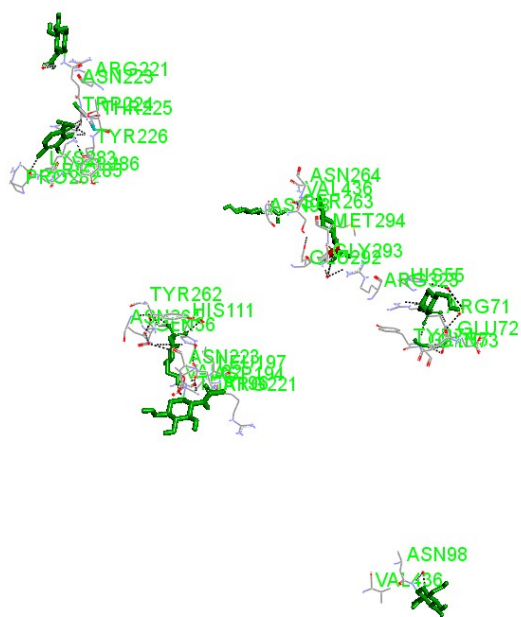

SR\_24:

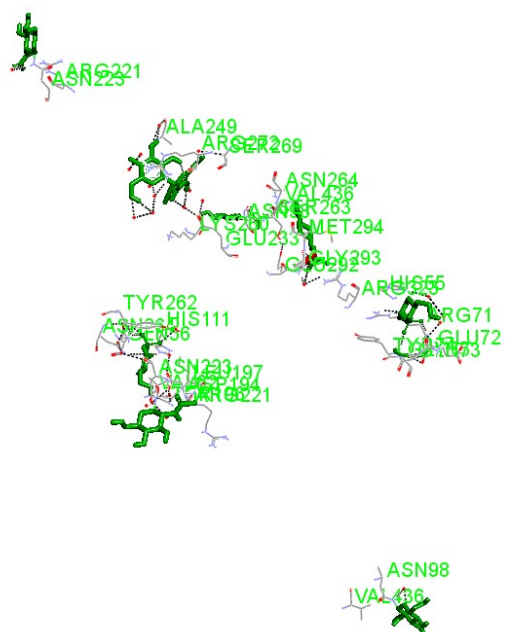

SR\_25:

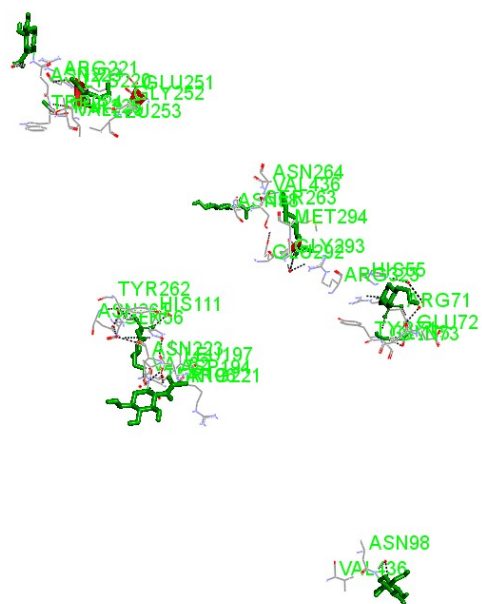

SR\_26:

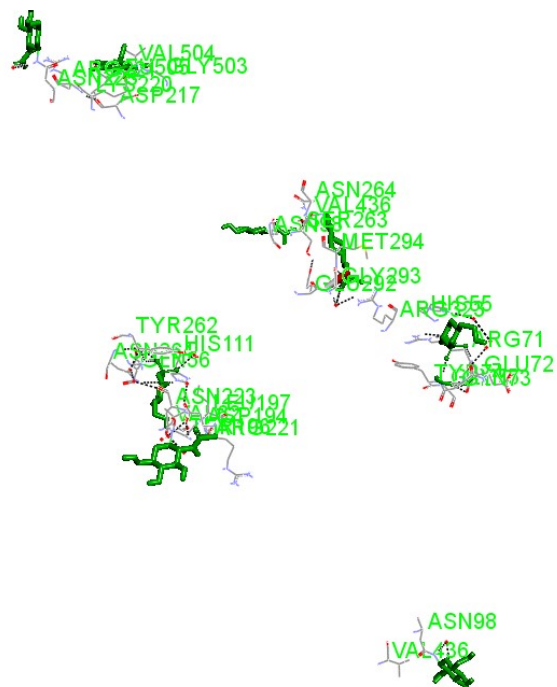

SR\_27:

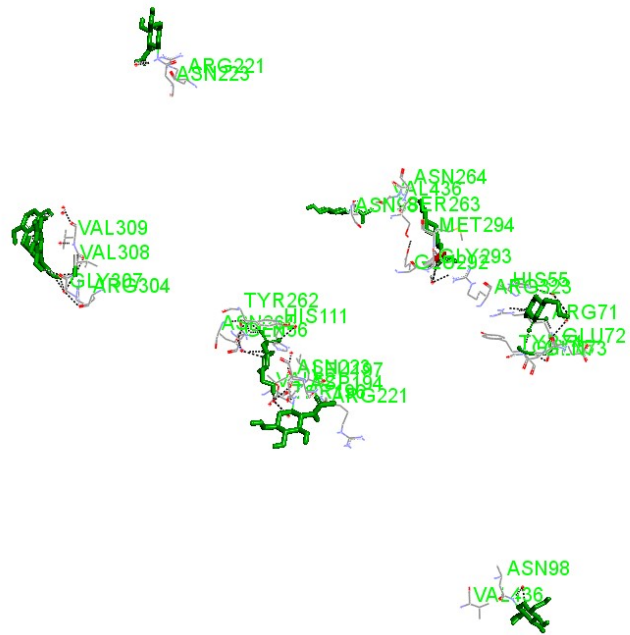

SR\_28:

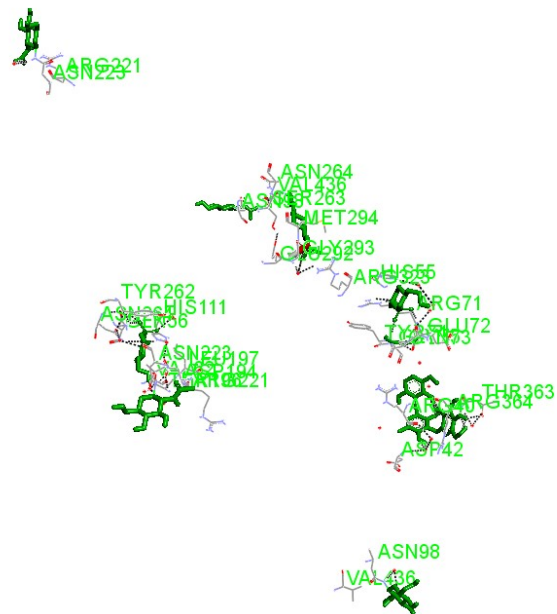

SR\_29:

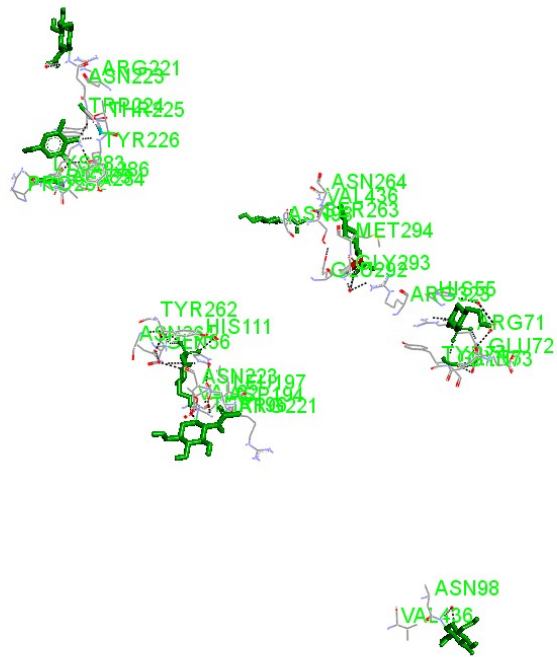

SR\_30:

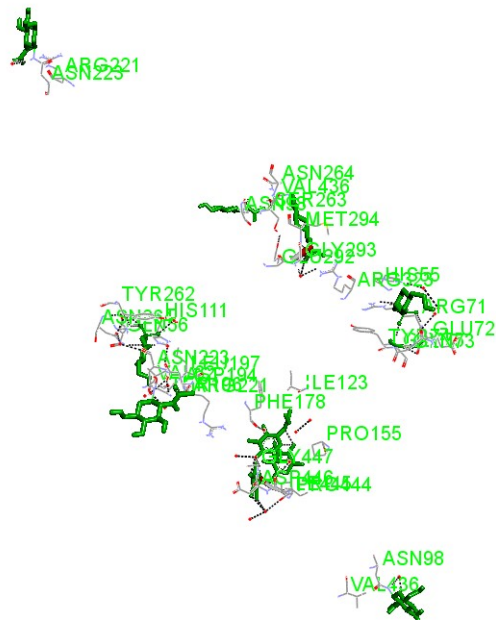

SR\_31:

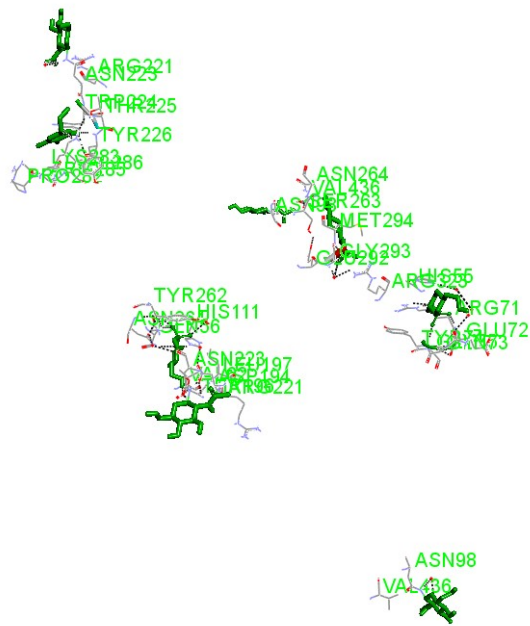

SR\_32:

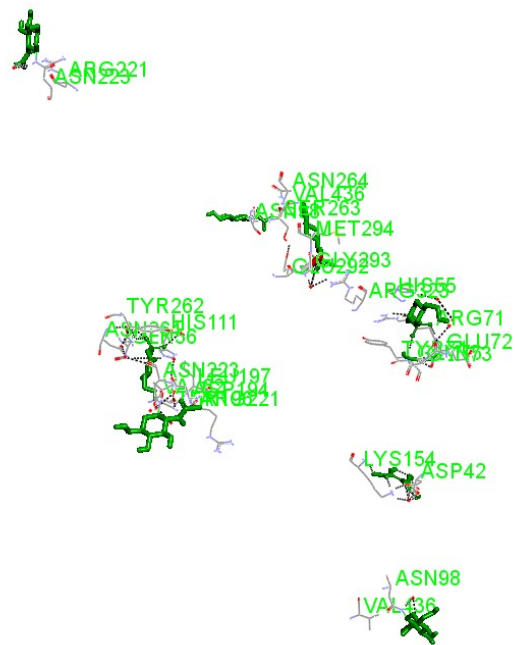



SR\_33:

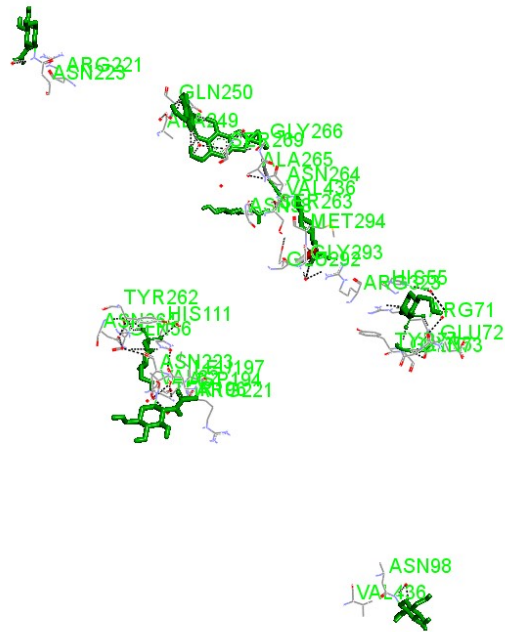

SR\_34:

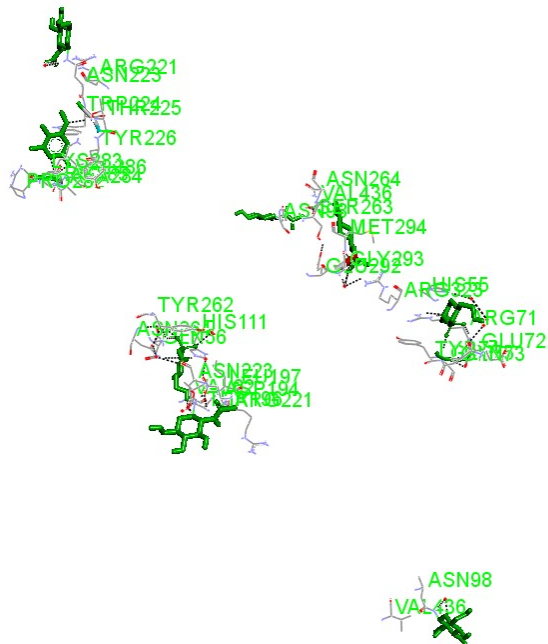

SR\_35:

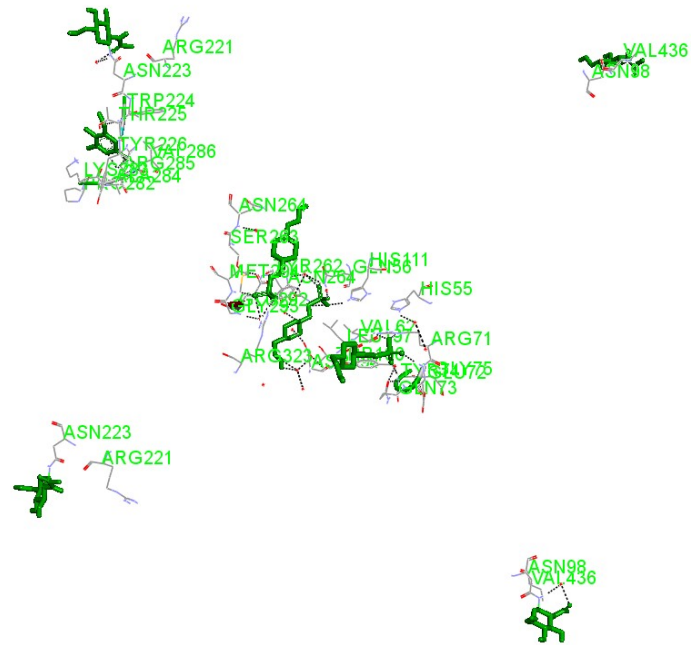

SR\_36:

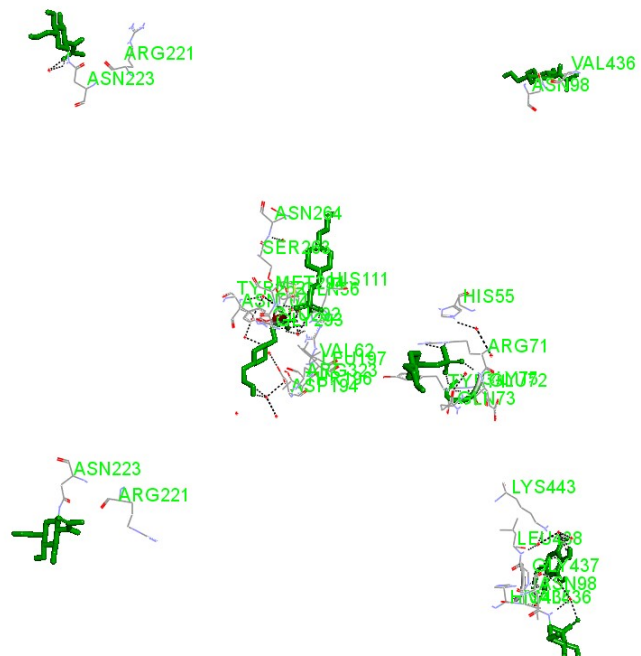

SR\_37:

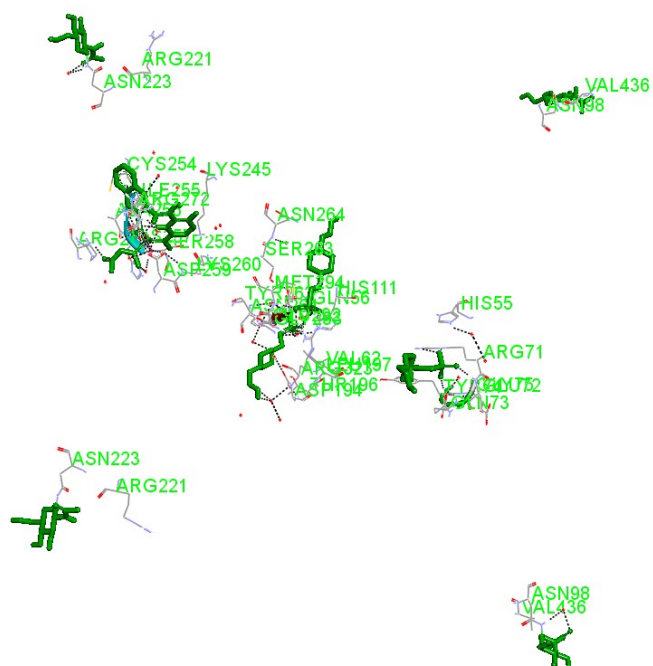

SR\_38:

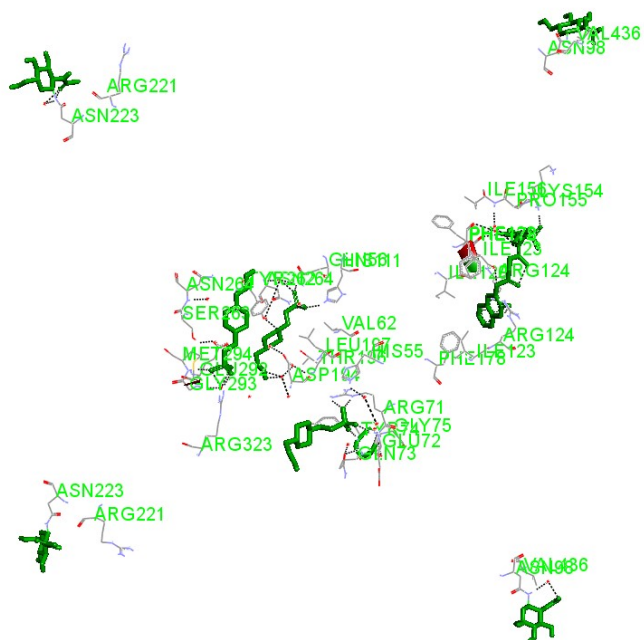

SR\_39:

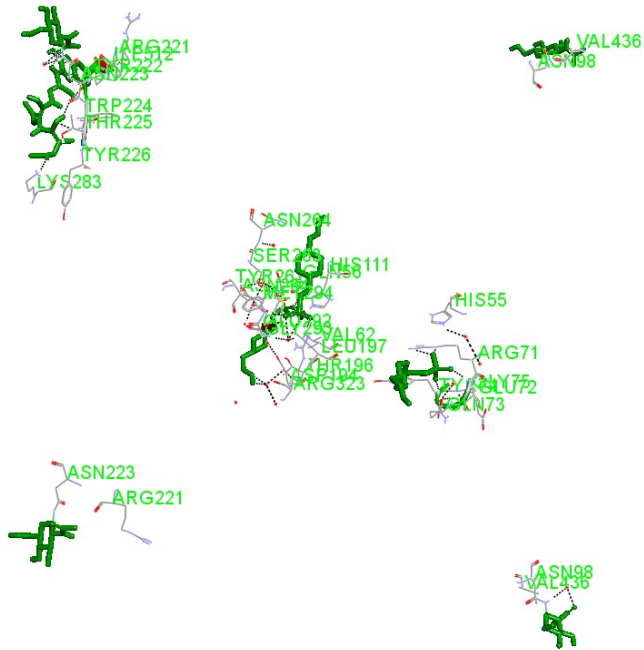

SR\_40:

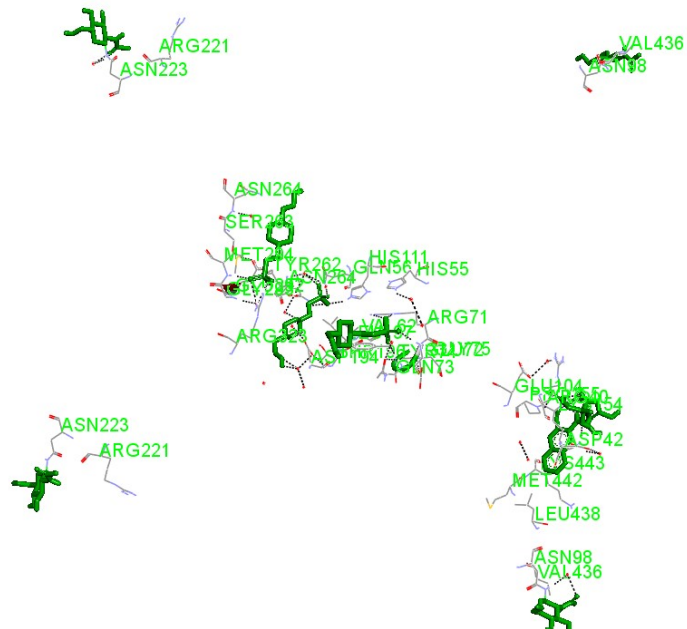

SR\_41:

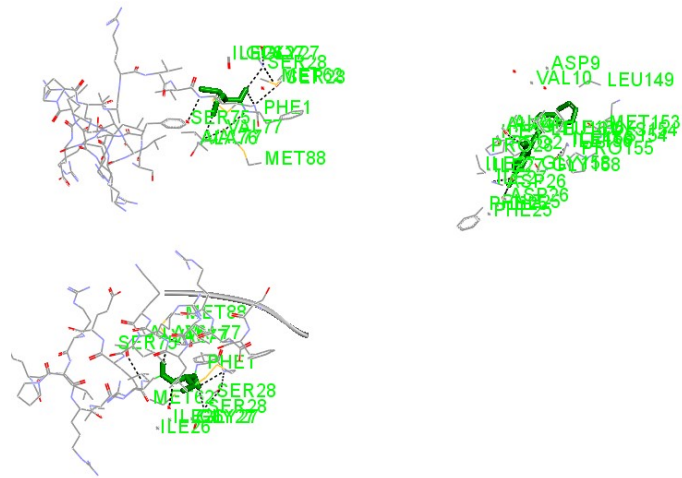

SR\_42:

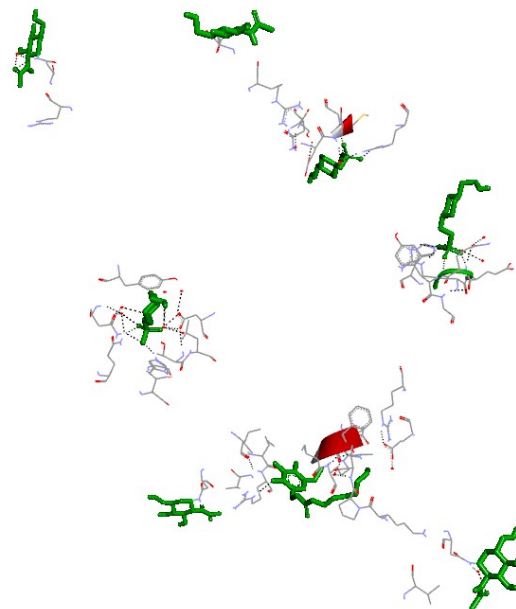

SR\_43:

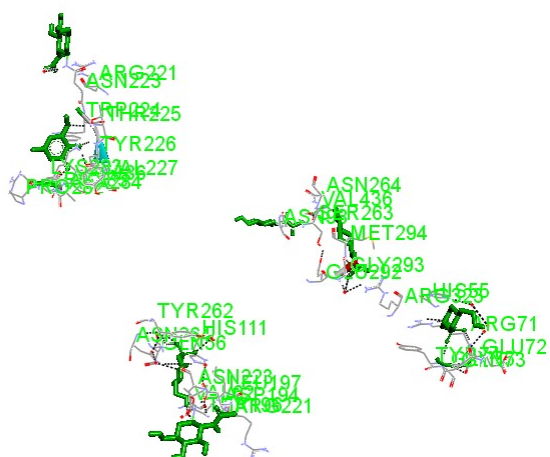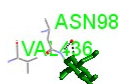

SR\_44:

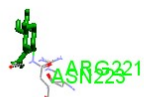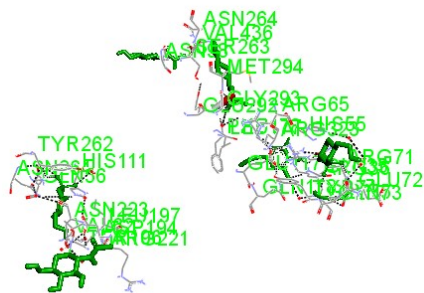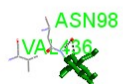



SR\_47:

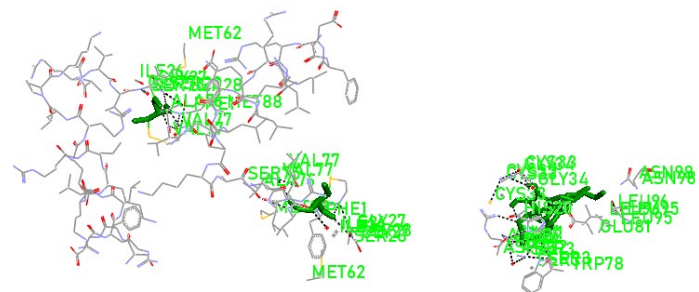

SR\_48:

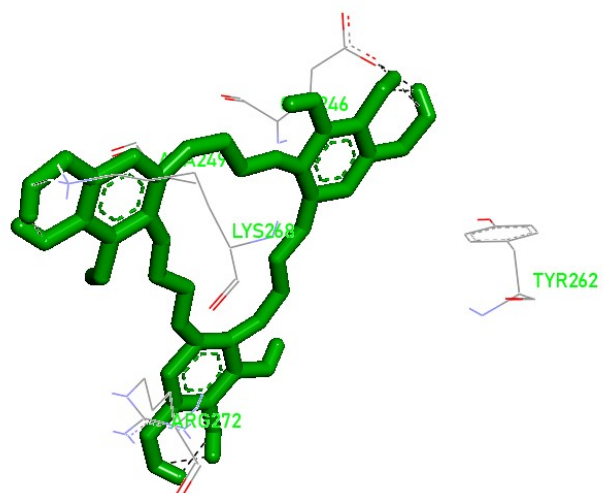



SR\_49:

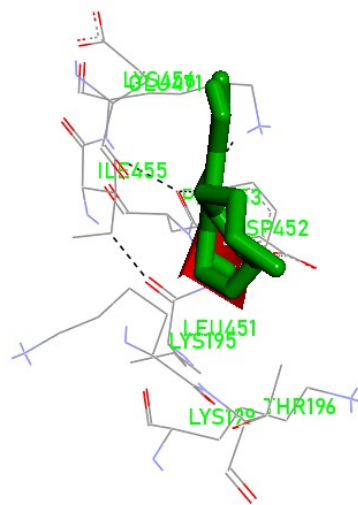

SR\_50:

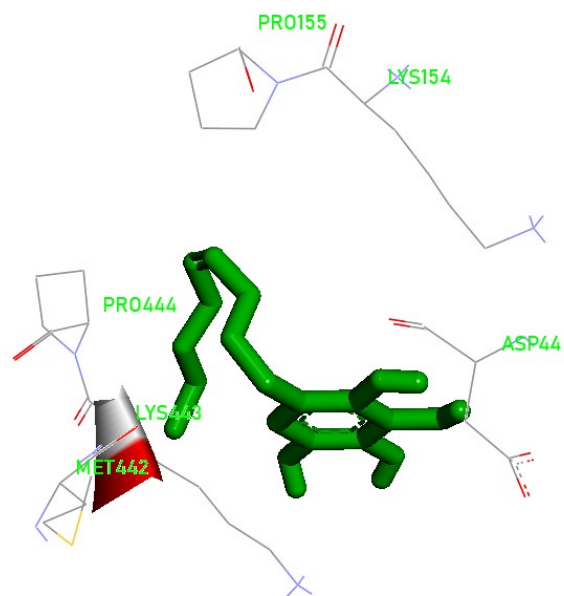

SR\_51:

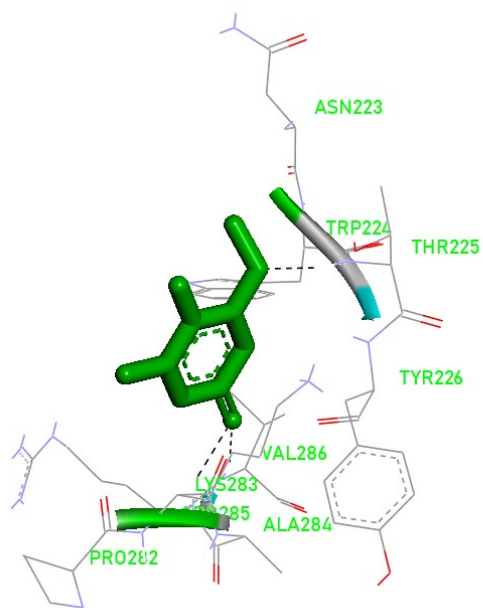

SR\_52:

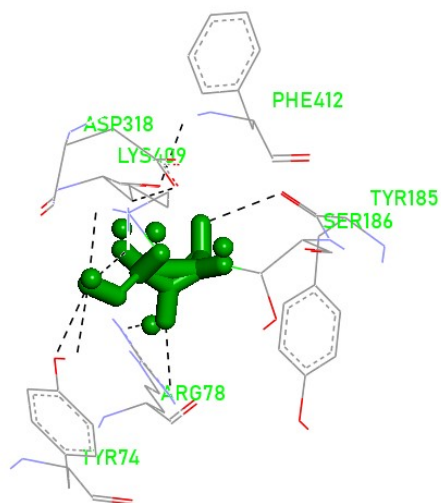

SR\_53:

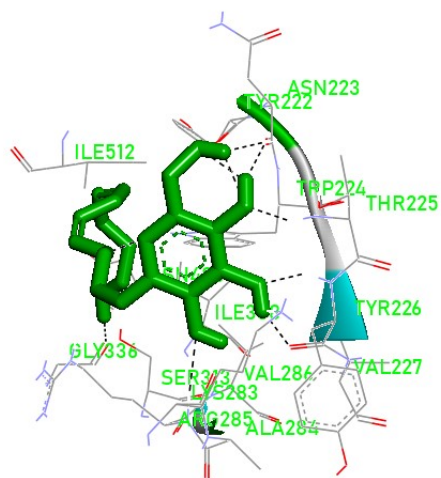

SR\_54:

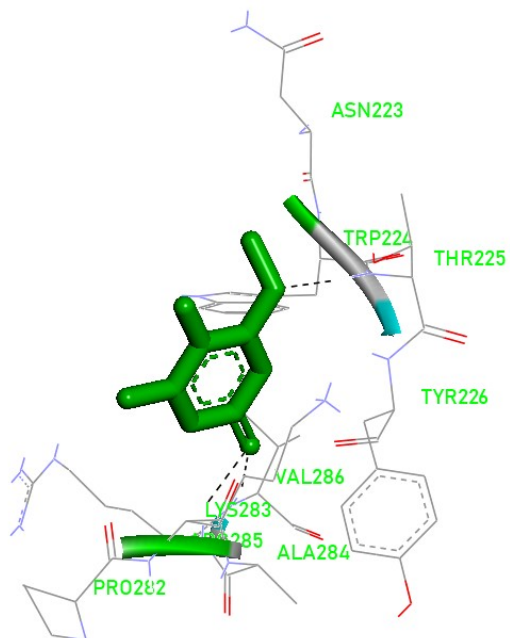

SR\_55:

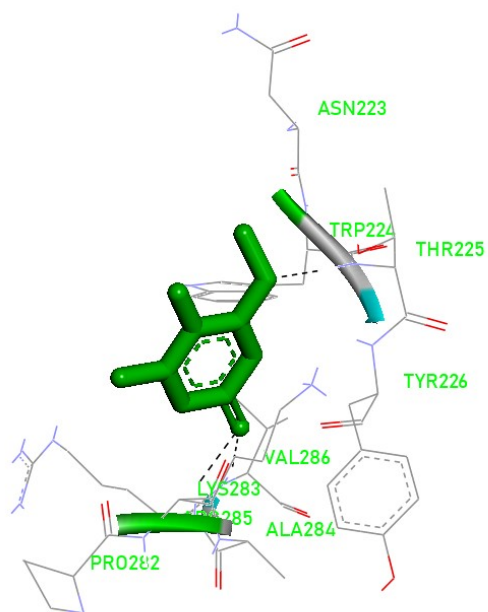

SR\_56:

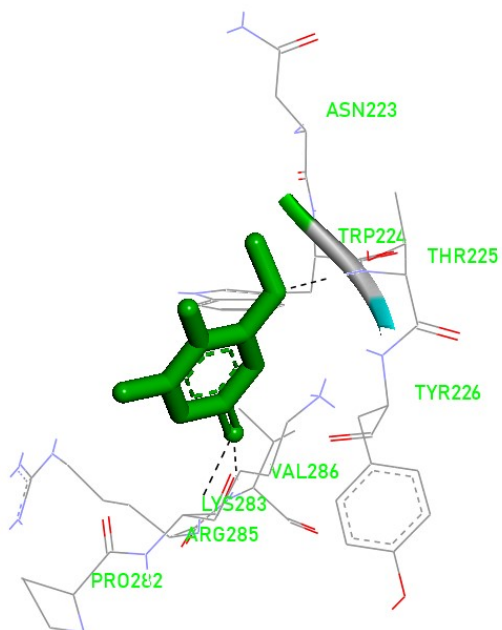

SR\_57:

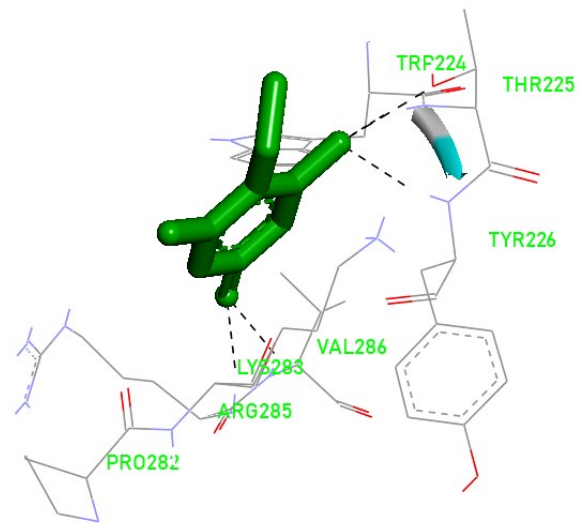

SR\_58:

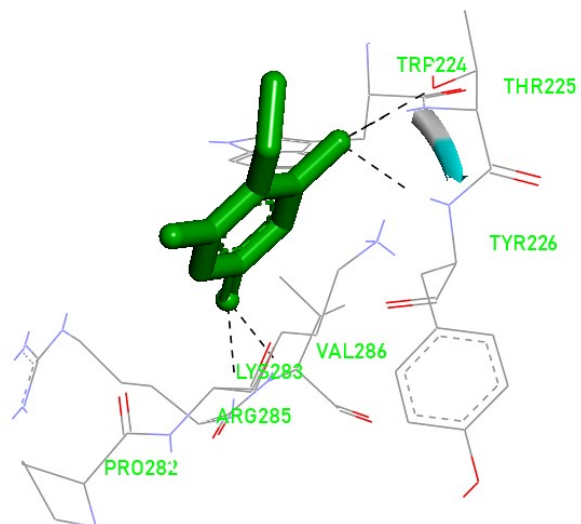

SR\_59:

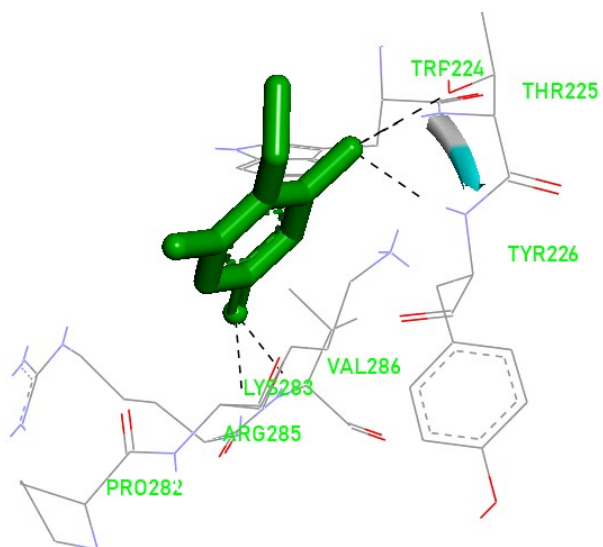

SR\_60:

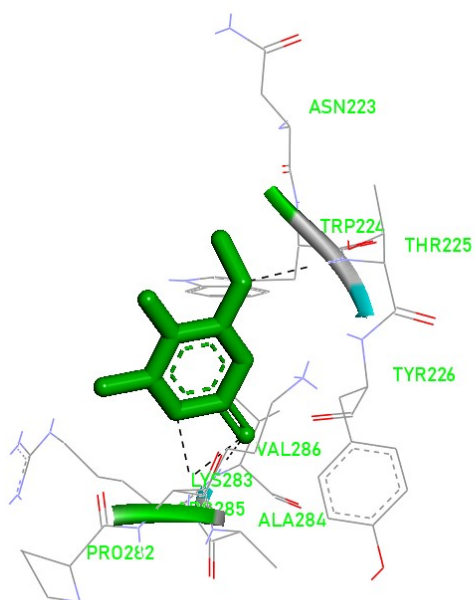

SR\_61:

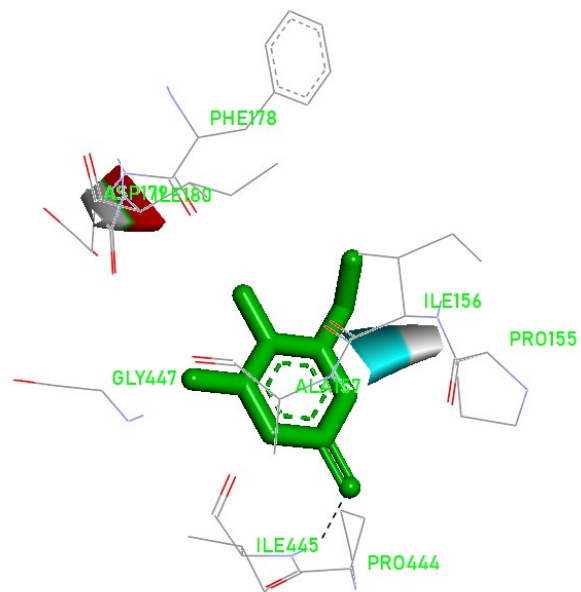

SR\_62:

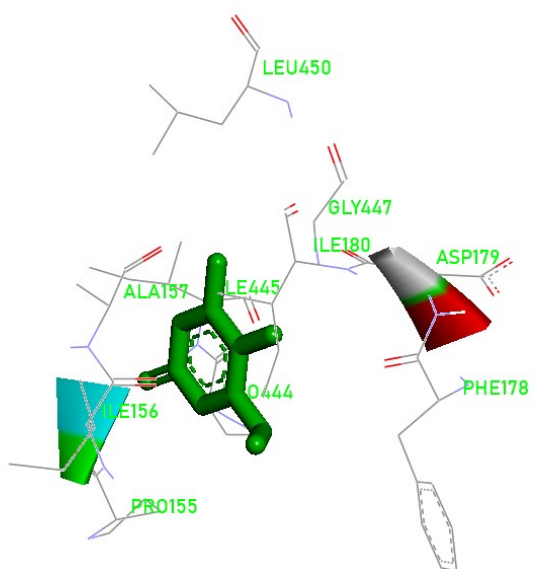

SR\_63:

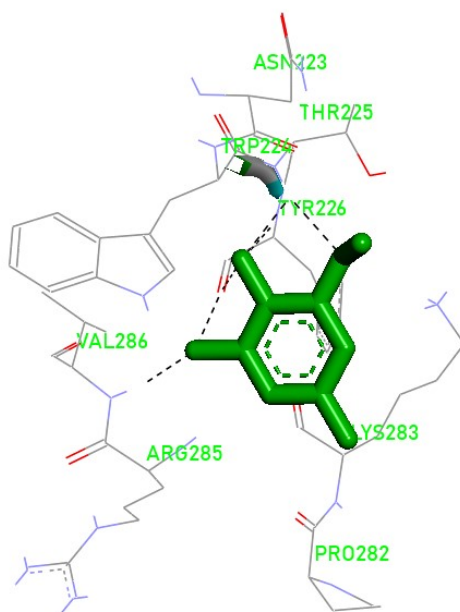

SR\_64:

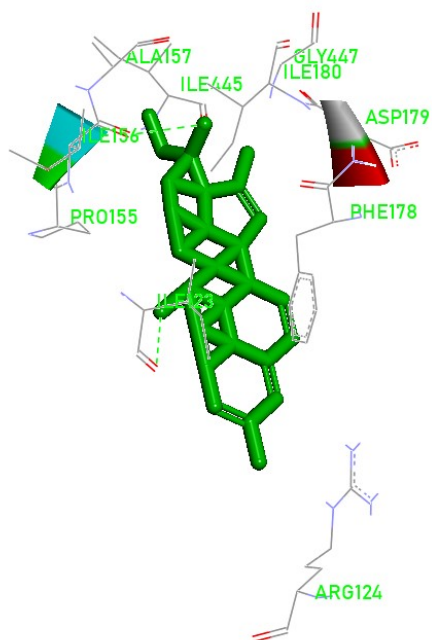



SR\_65:

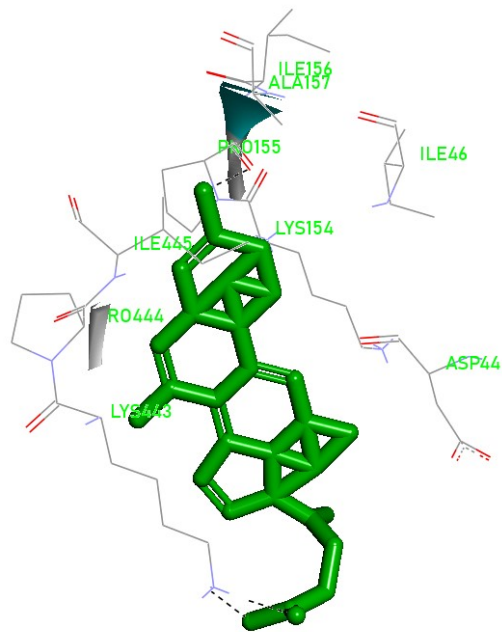

SR\_66:

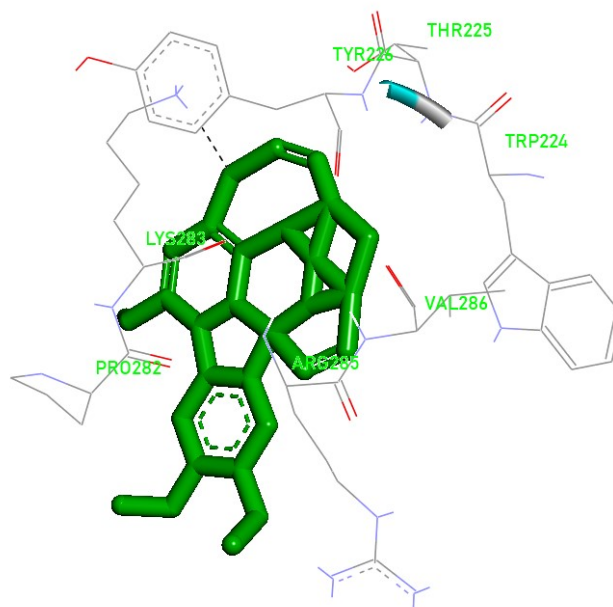

SR\_67:

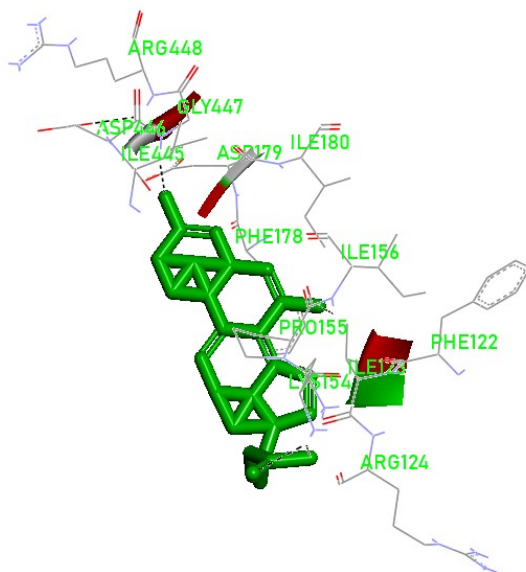

SR\_68:

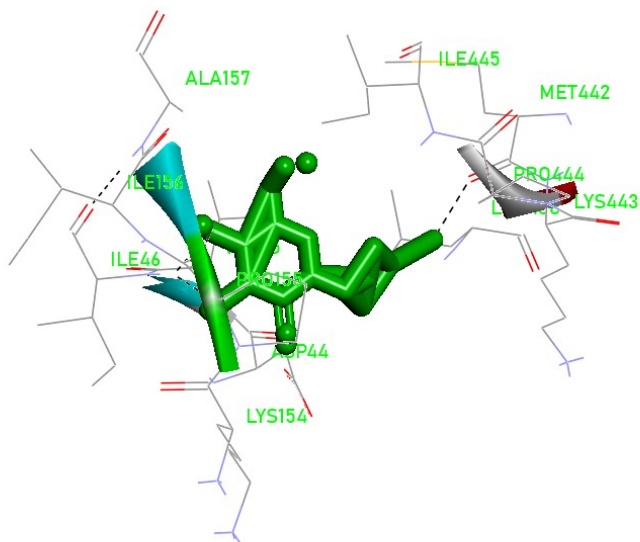

SR\_69:

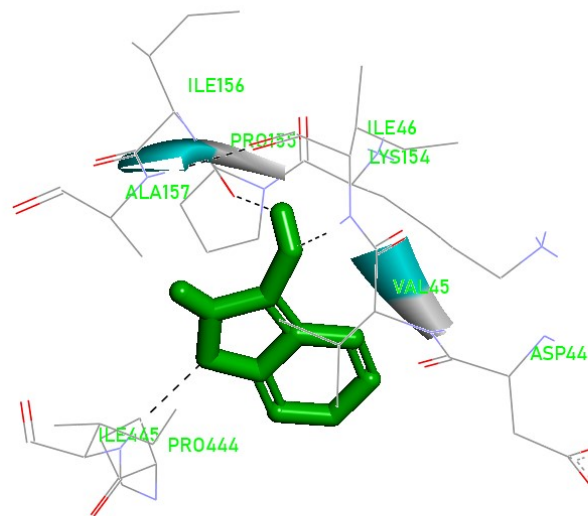

SR\_70:

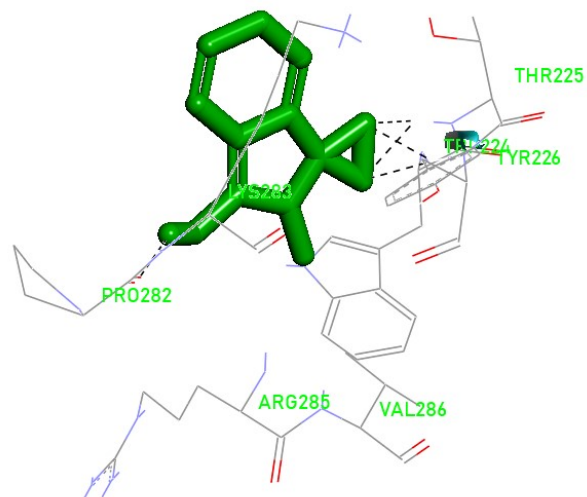

SR\_71:

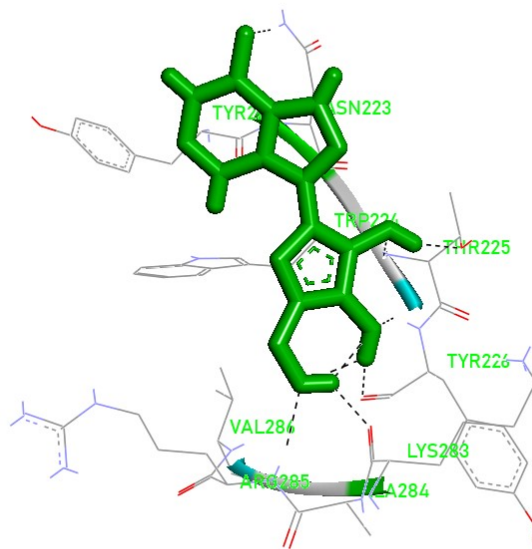

SR\_72:

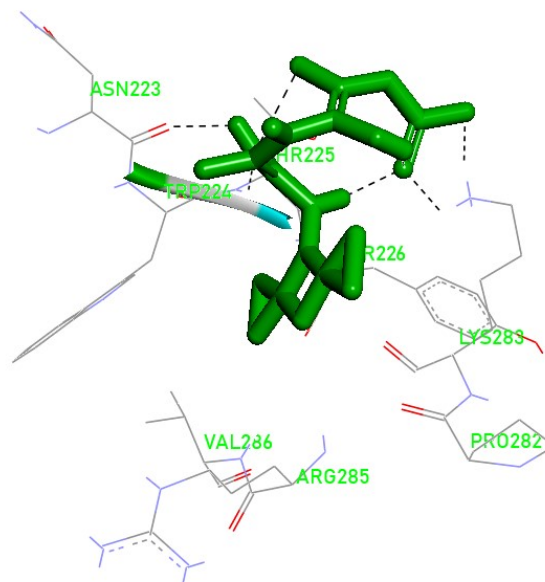

SR\_73:

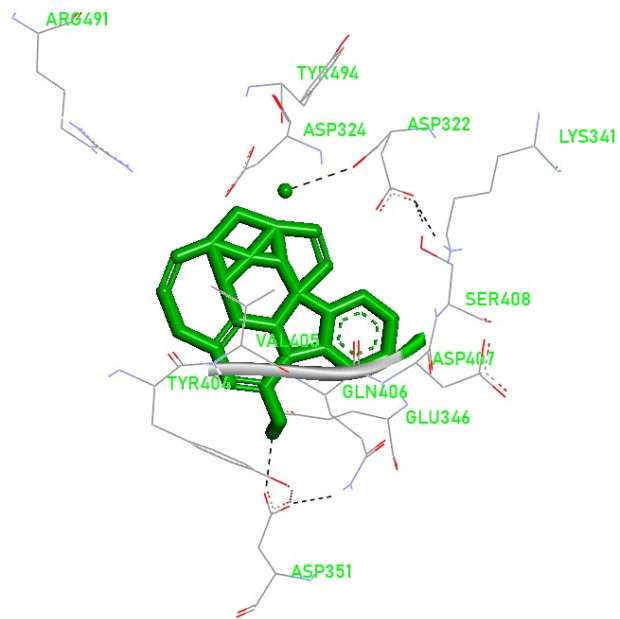

SR\_74:

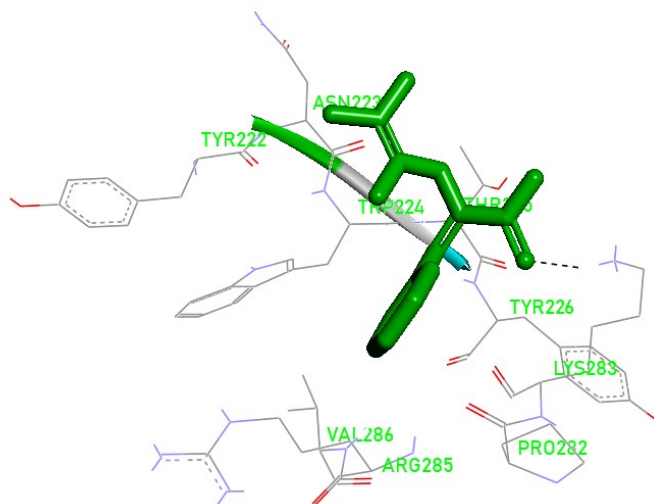

SR\_75:

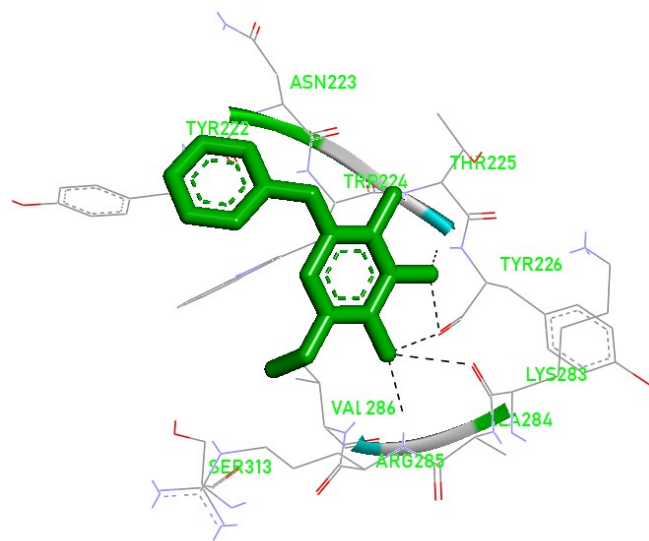

SR\_76:

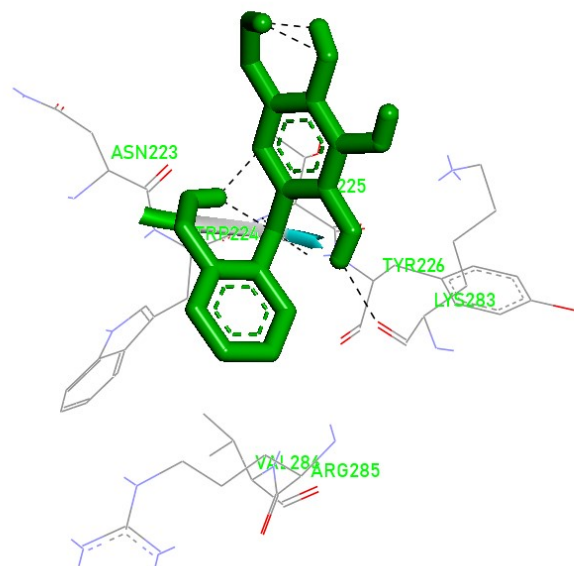

SR\_77:

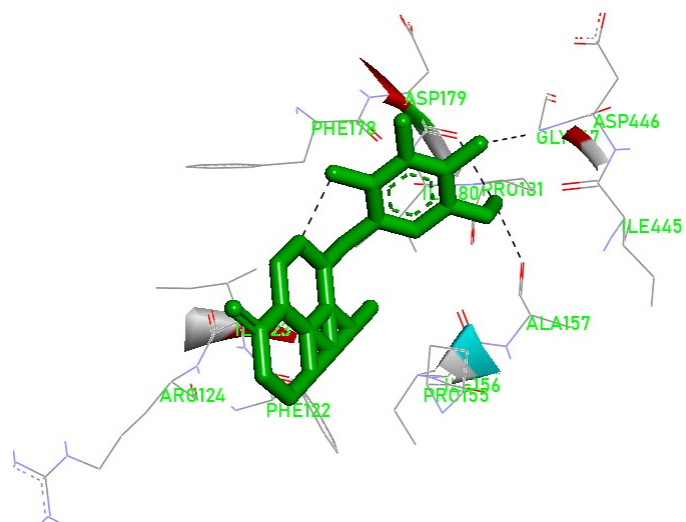

SR\_78:

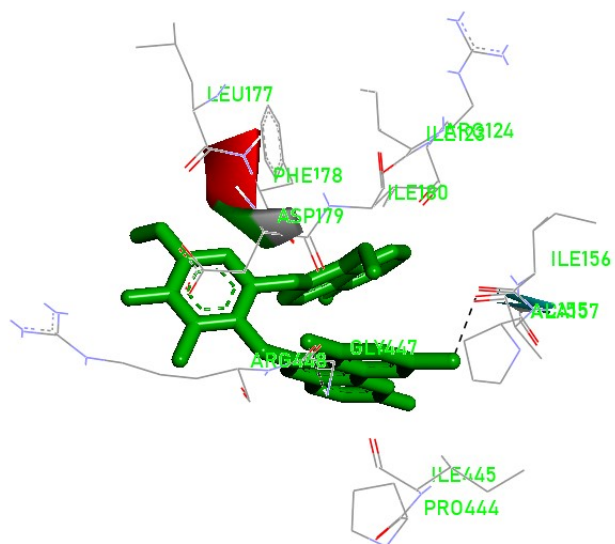

SR\_79:

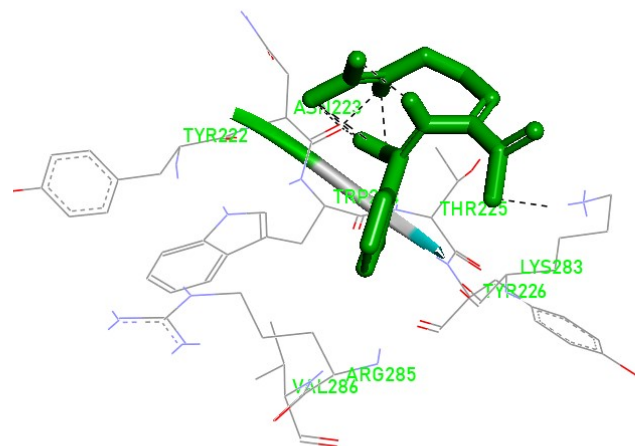

SR\_80:

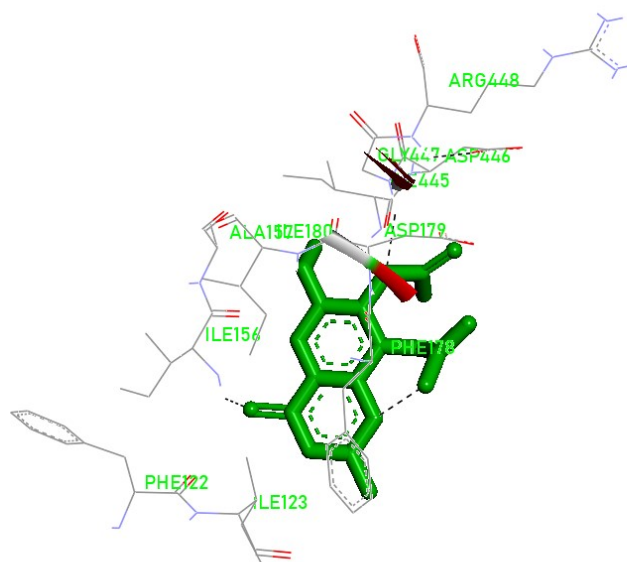



SR\_81:

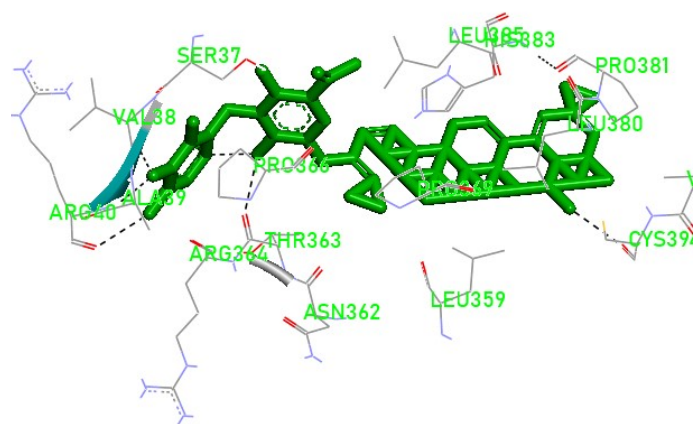

SR\_82:

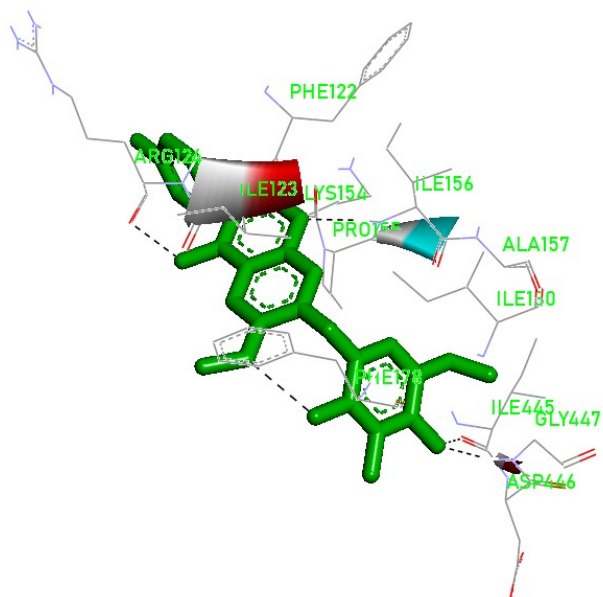

SR\_83:

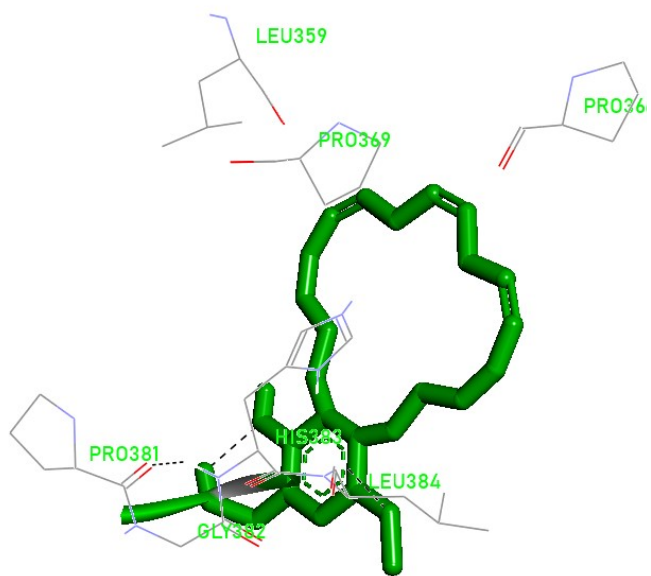

SR\_84:

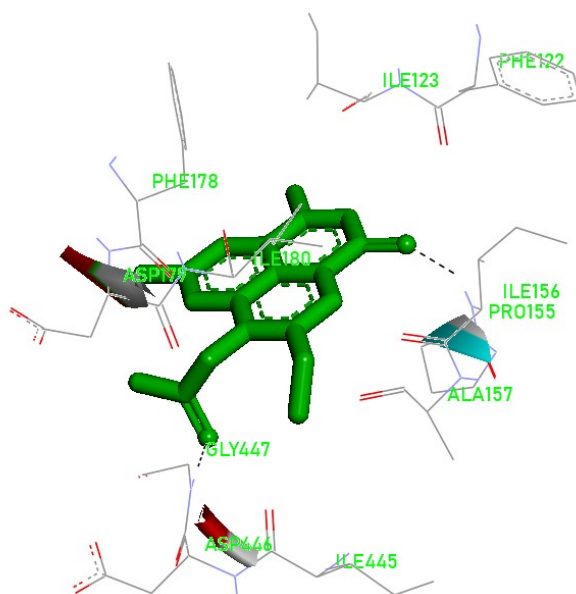

SR\_85:

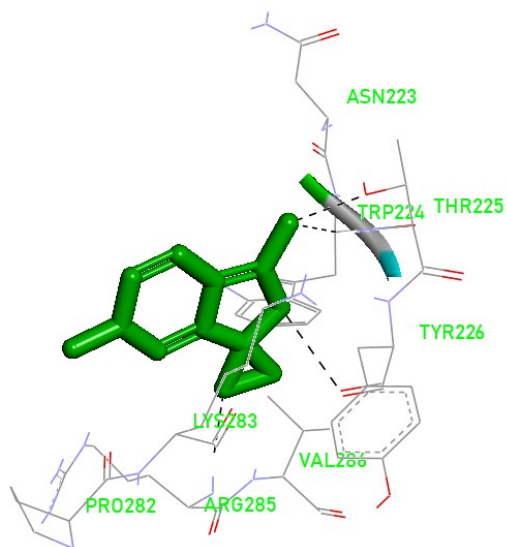

SR\_86:

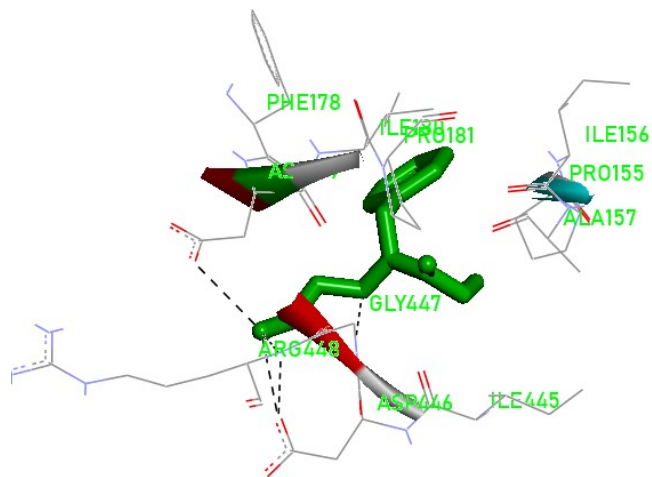

SR\_87:

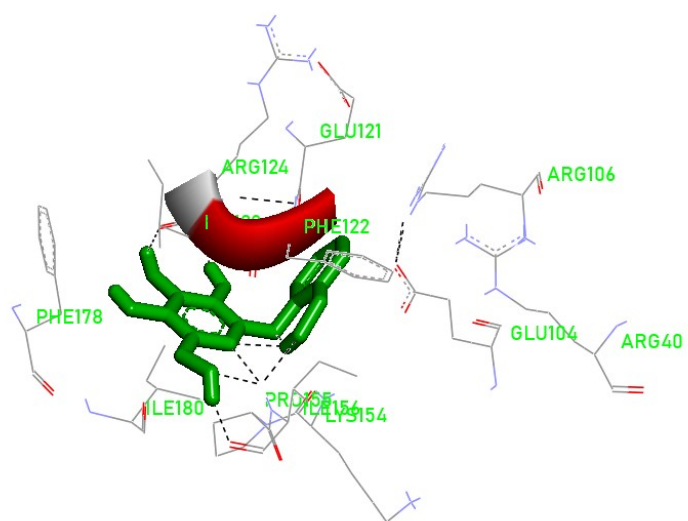

SR\_88:

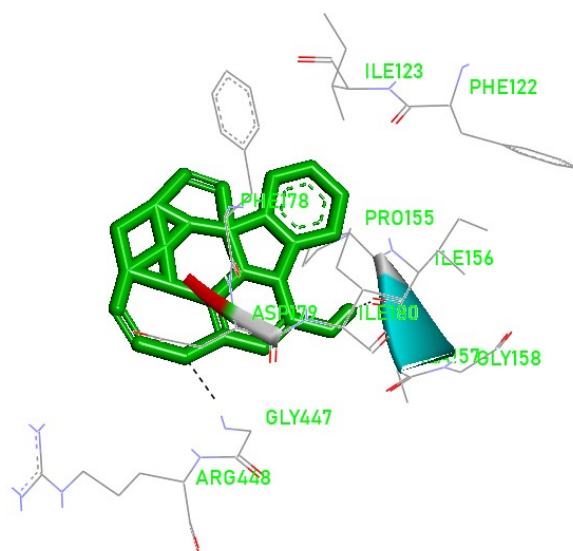

SR\_89:

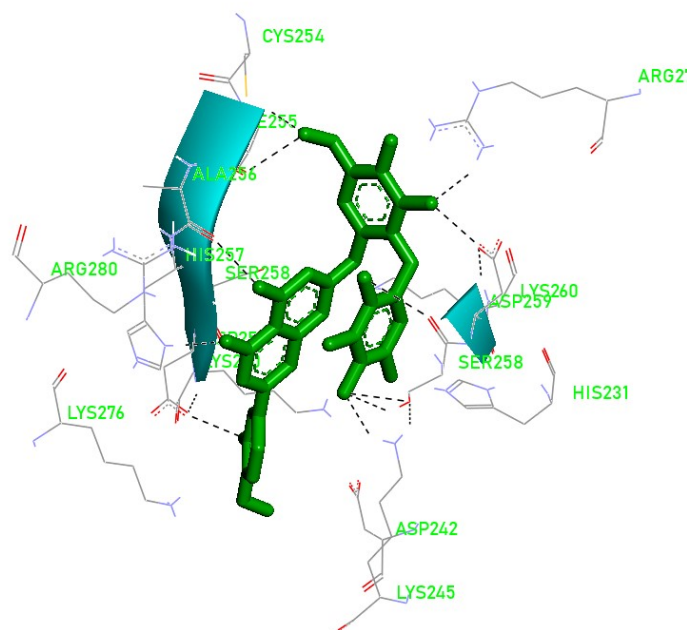

SR\_90:

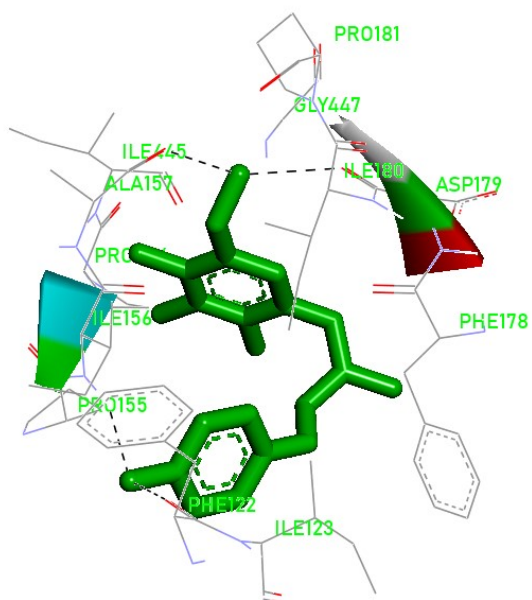

SR\_91:

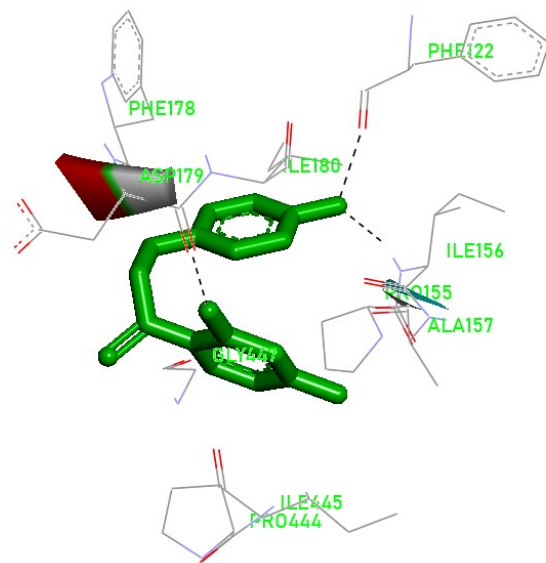

SR\_92:

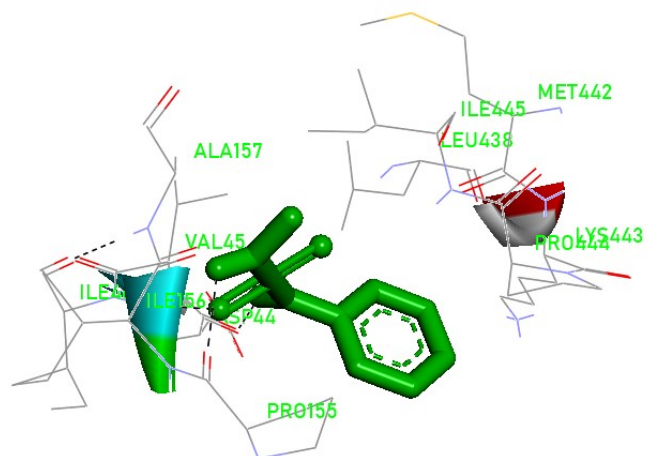

SR\_93:

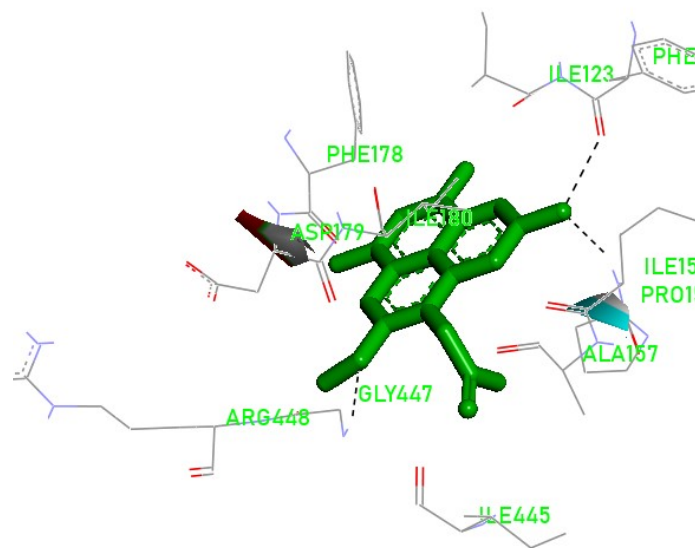

SR\_94:

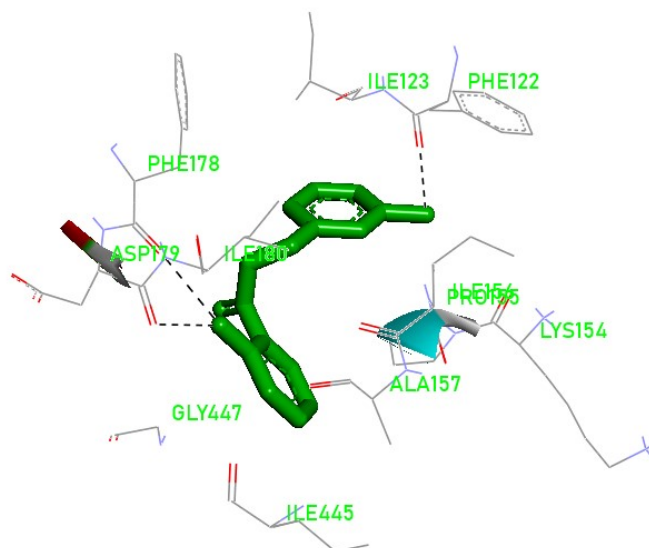

SR\_95:

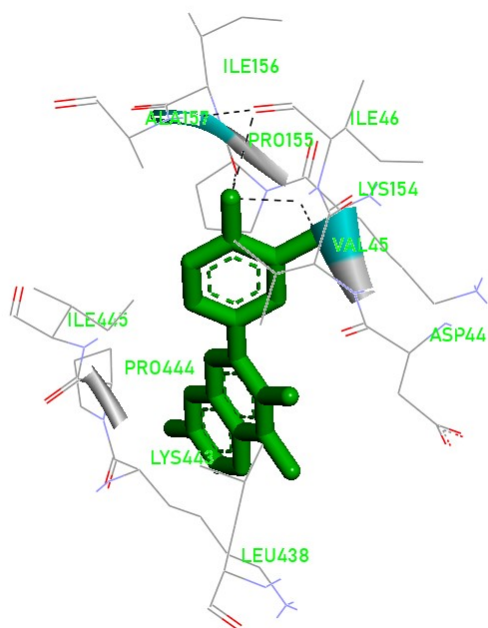

SR\_96:

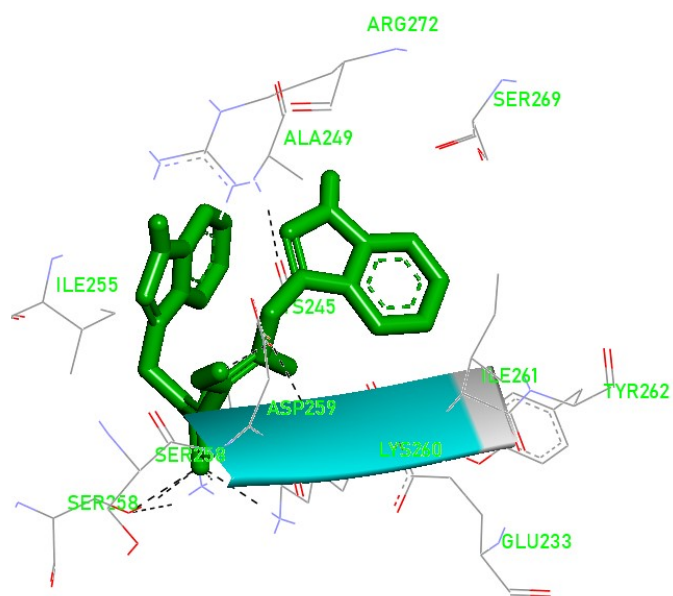



SR\_97:

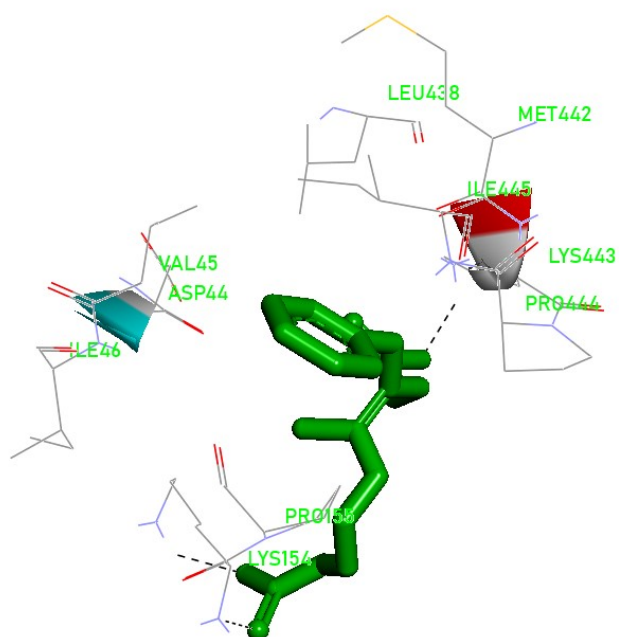

SR\_98:

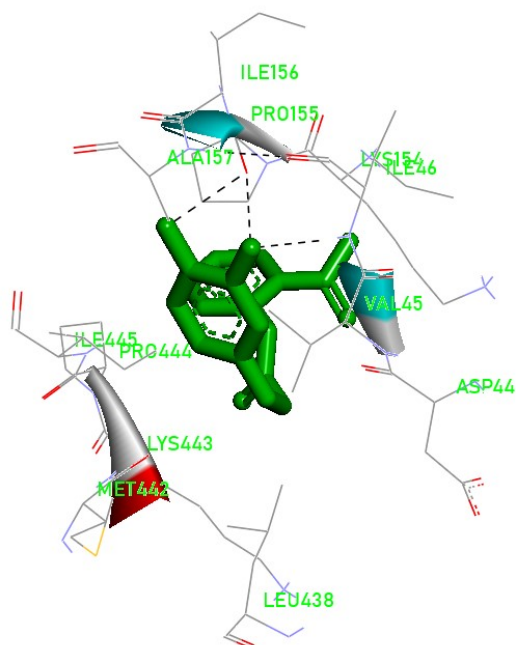

SR\_99:

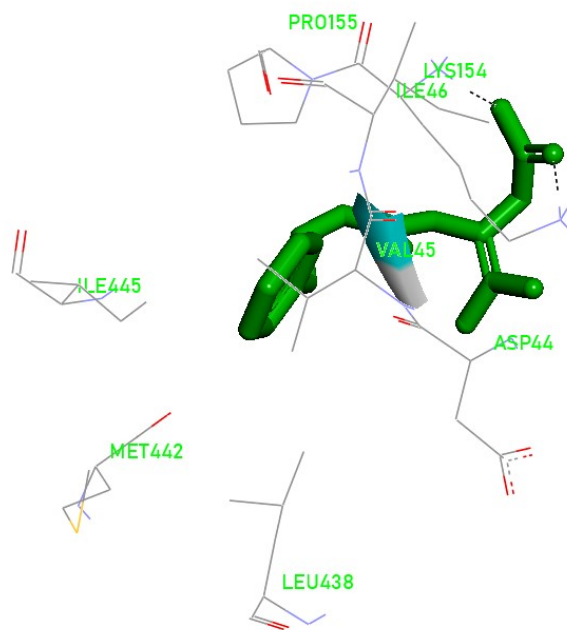

SR\_100:

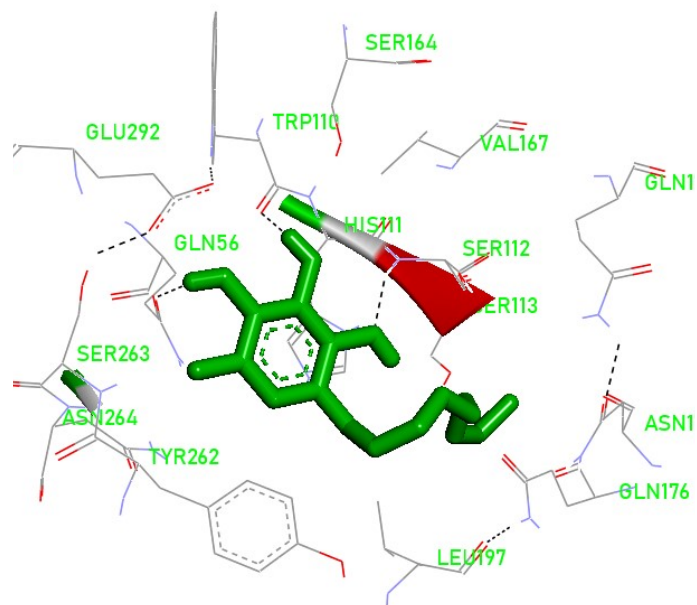

SR\_101:

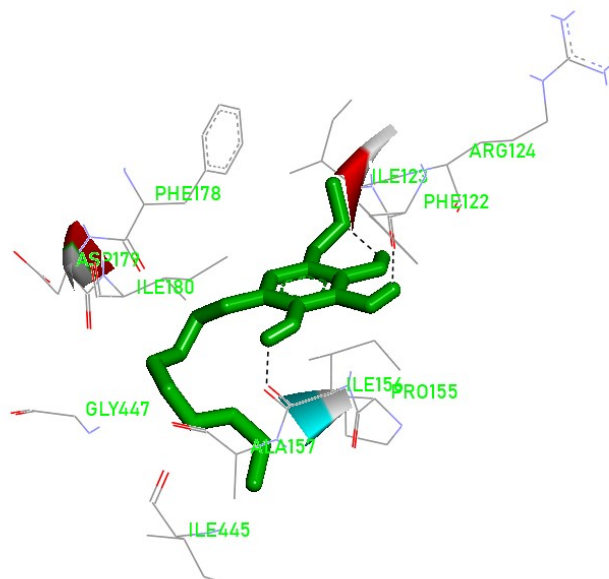

SR\_102:

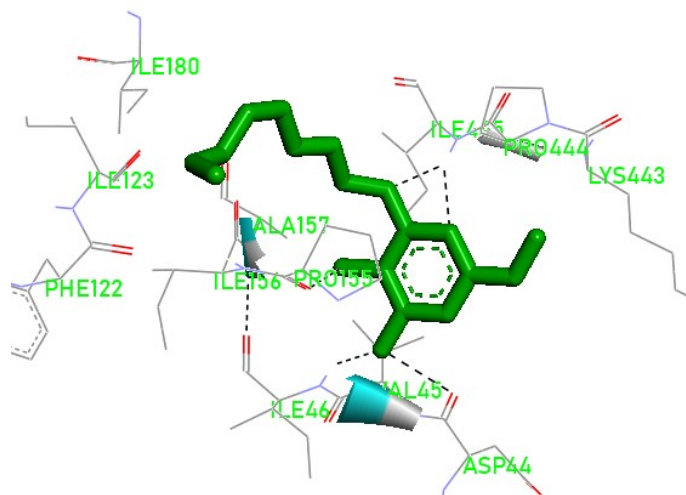

SR\_103:

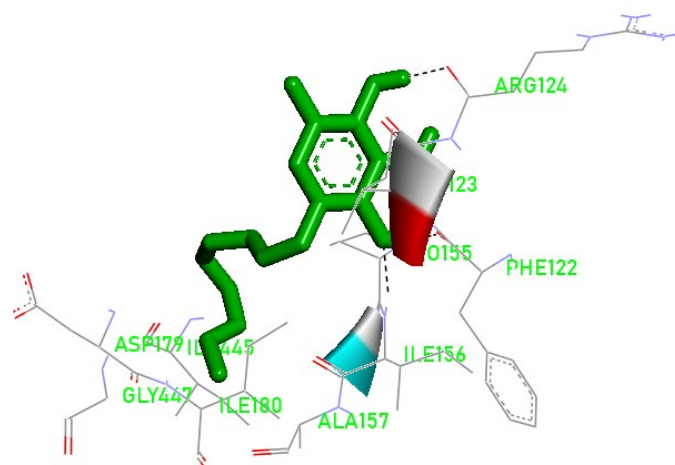

SR\_104:

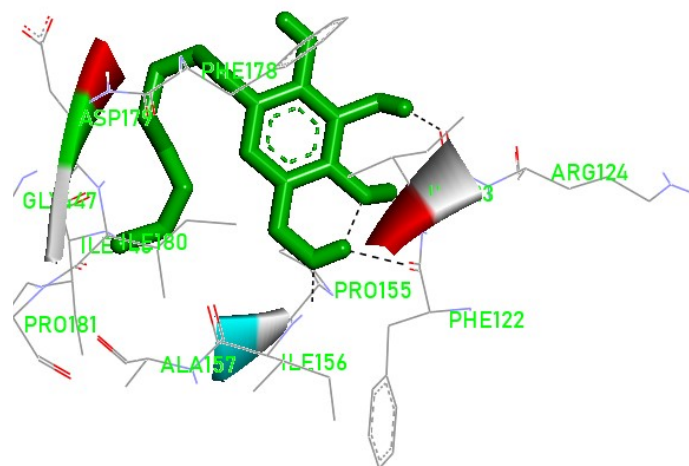

SR\_105:

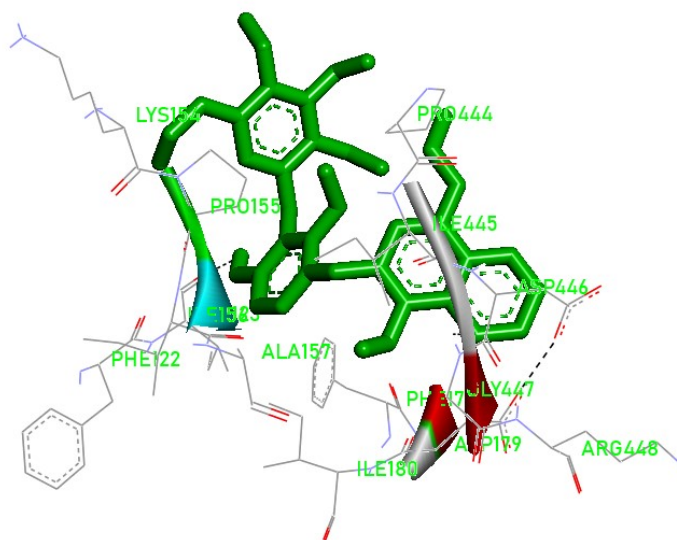

SR\_106:

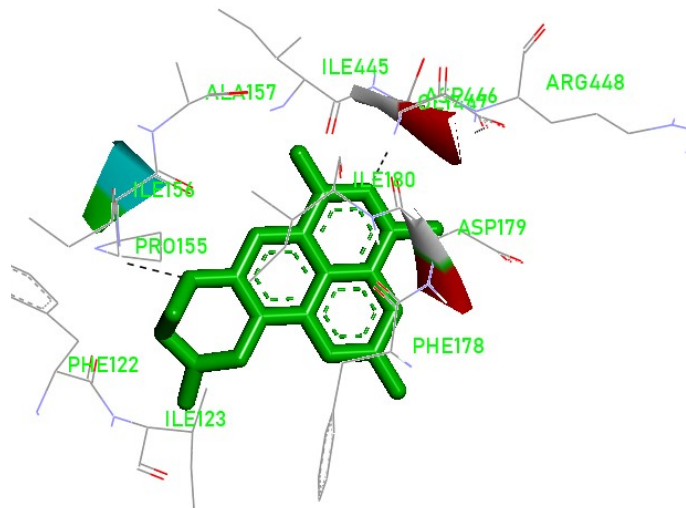

SR\_107:

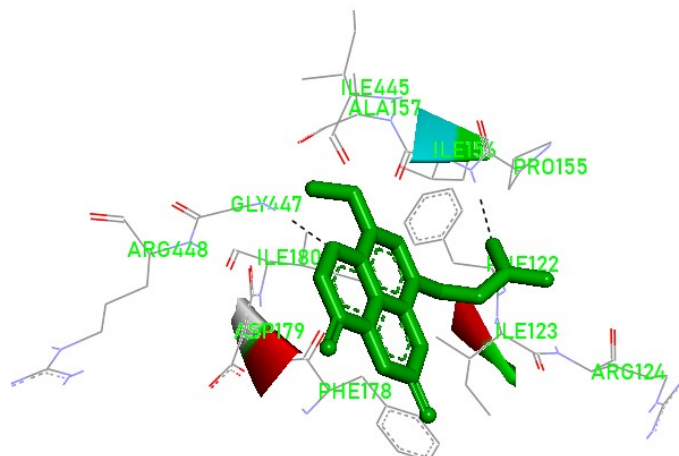

SR\_108:

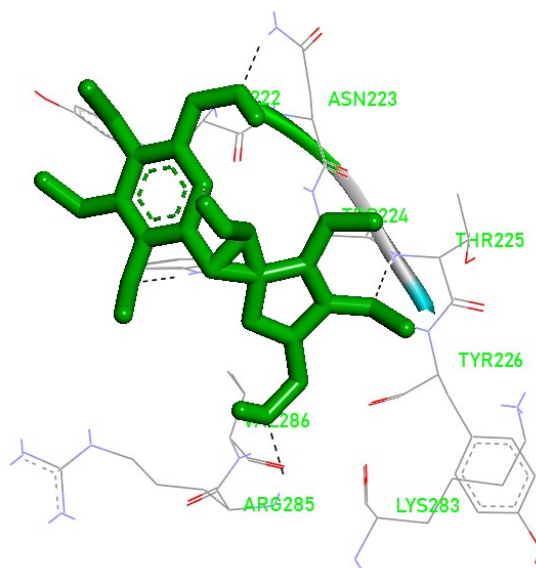

SR\_109:

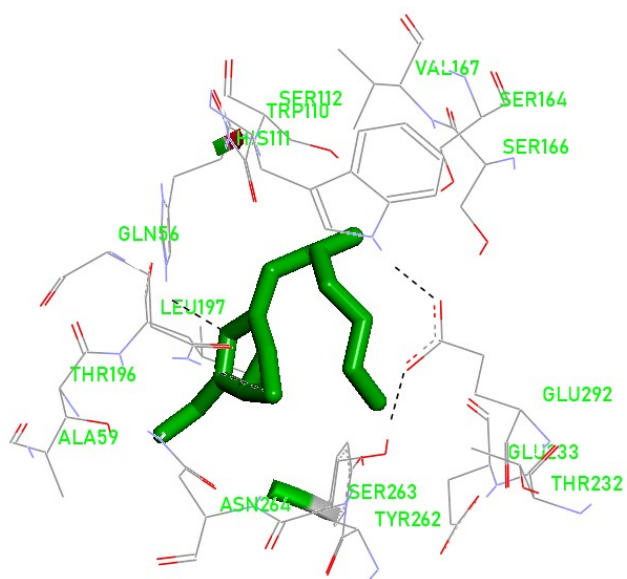

SR\_110:

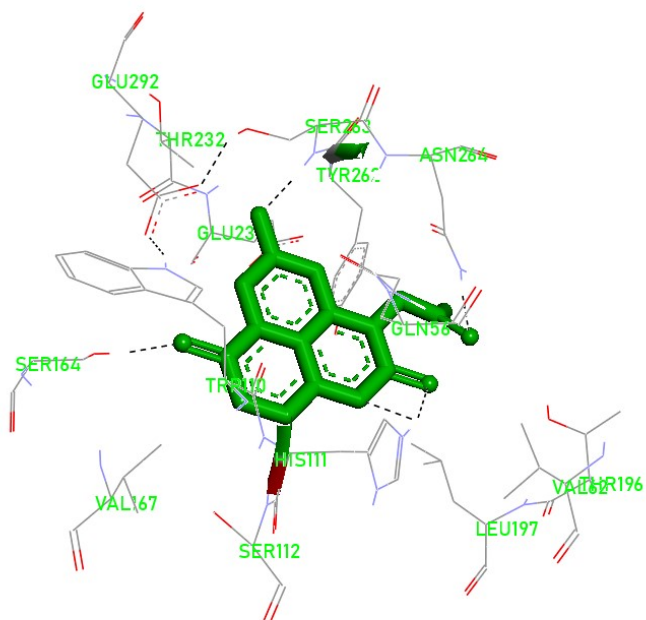

SR\_111:

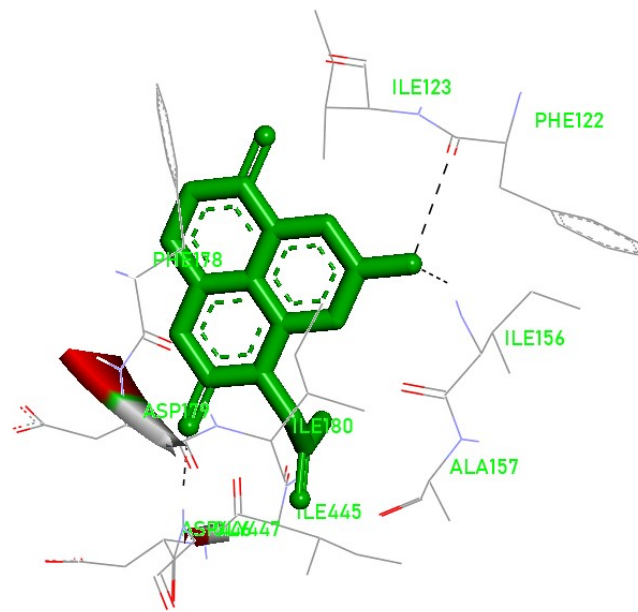

SR\_112:

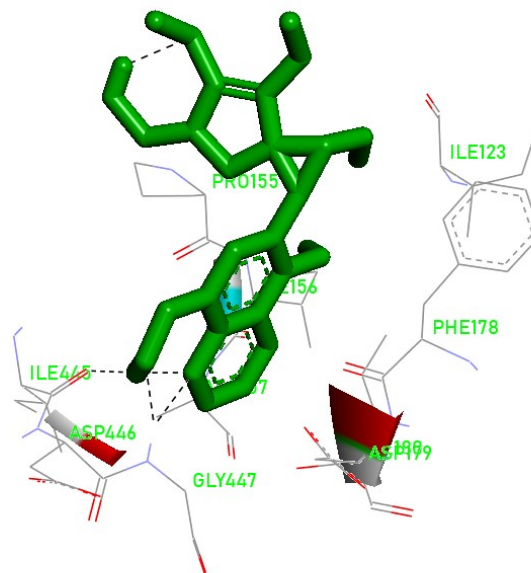



SR\_113:

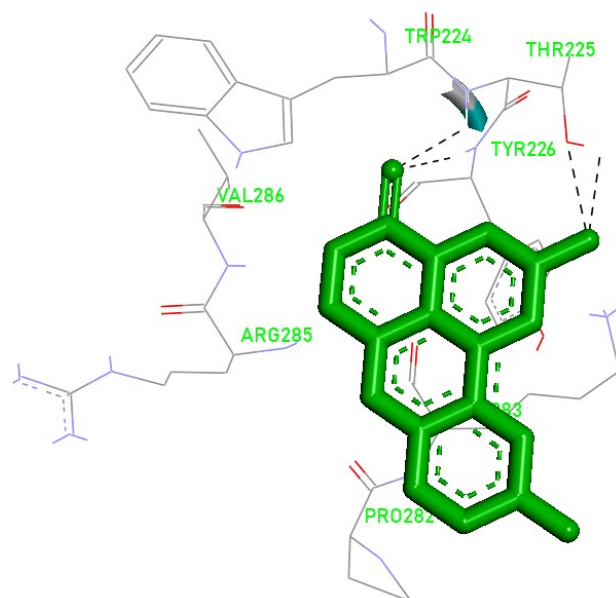

SR\_114:

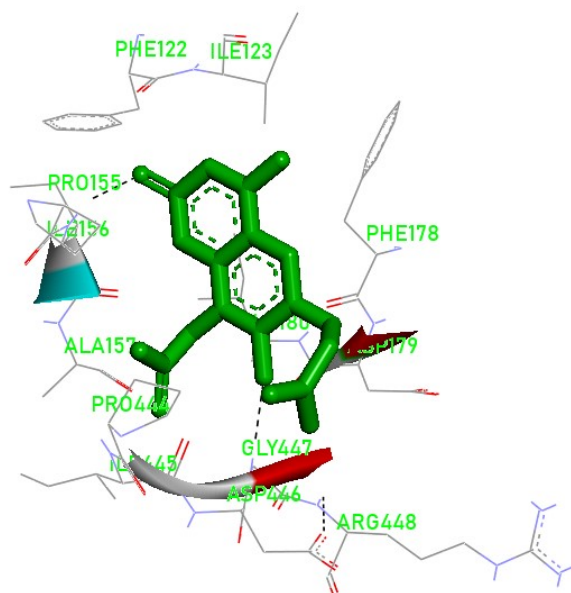

SR\_115:

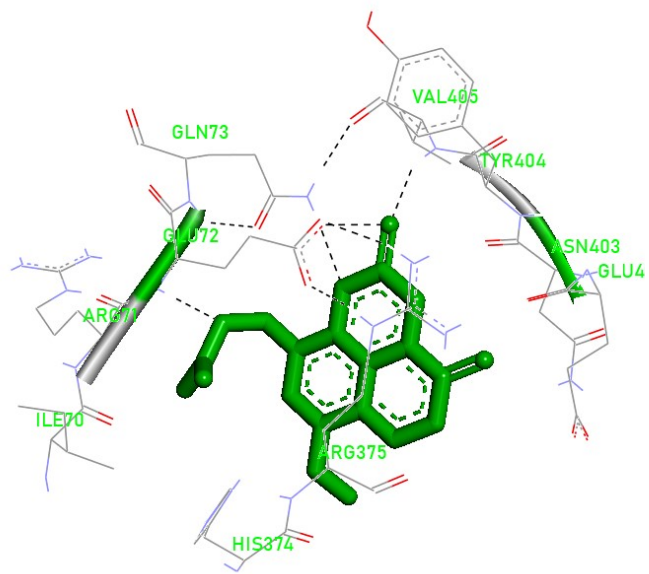

SR\_116:

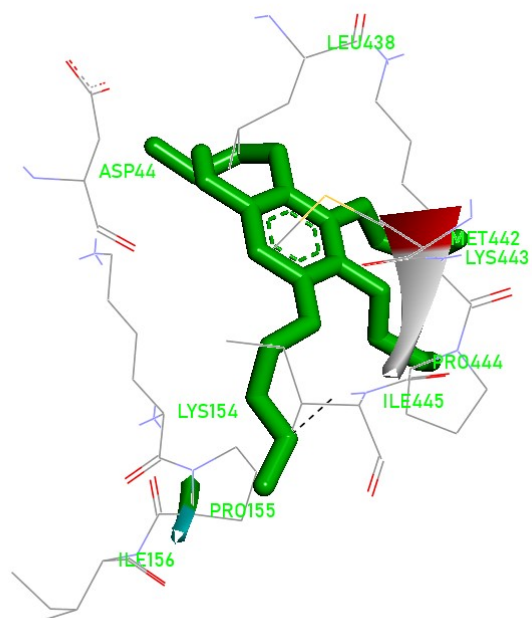

SR\_117:

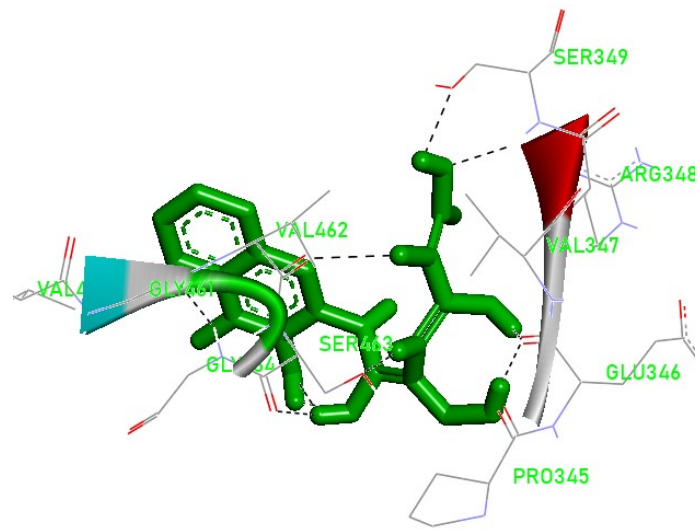

SR\_118:

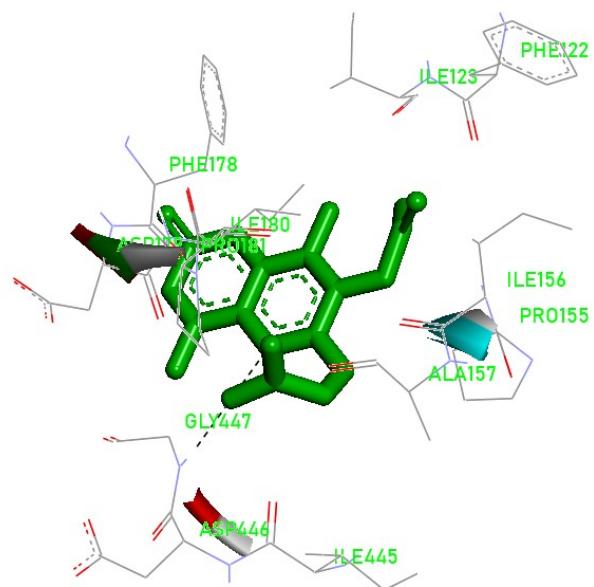

SR\_119:

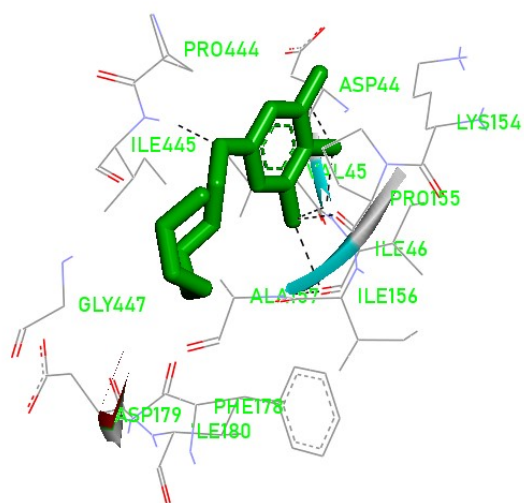

SR\_120:

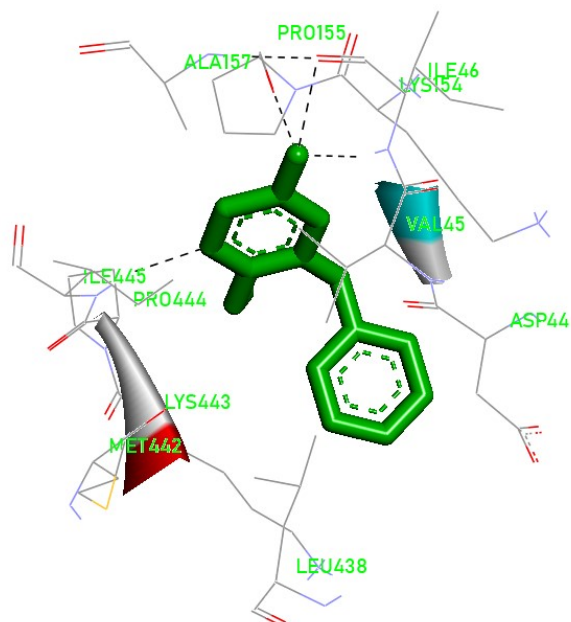

SR\_121:

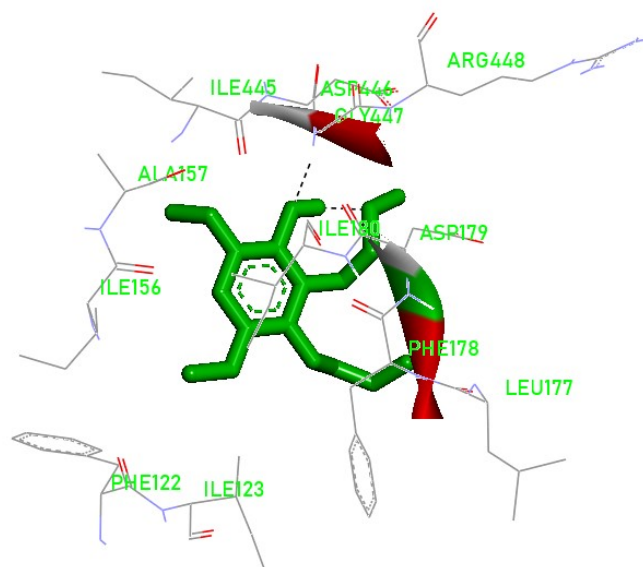

SR\_122:

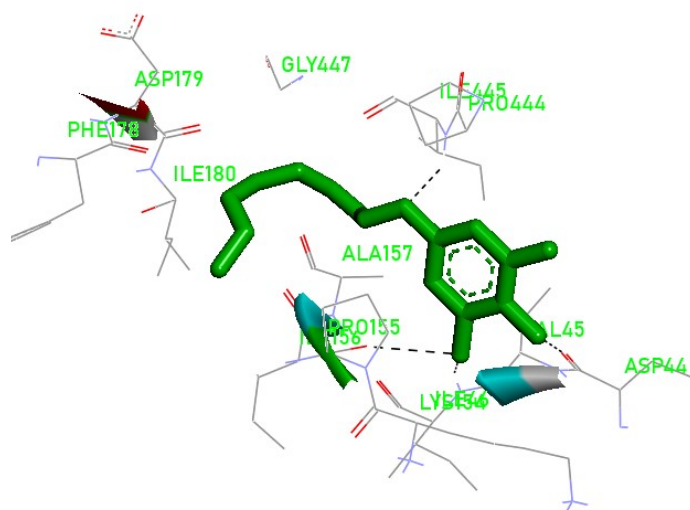

SR\_123:

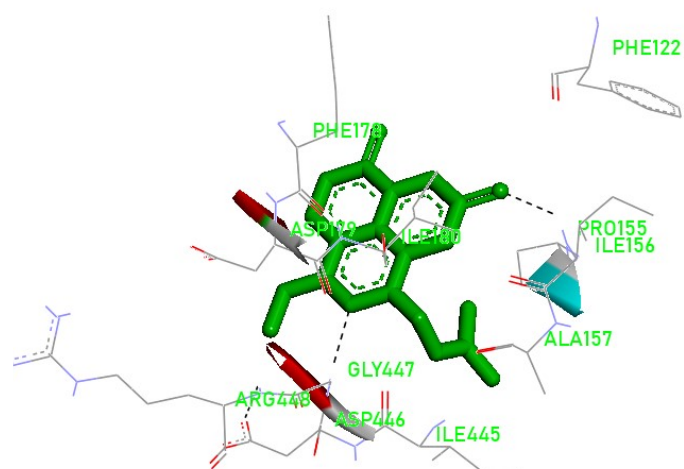

SR\_124:

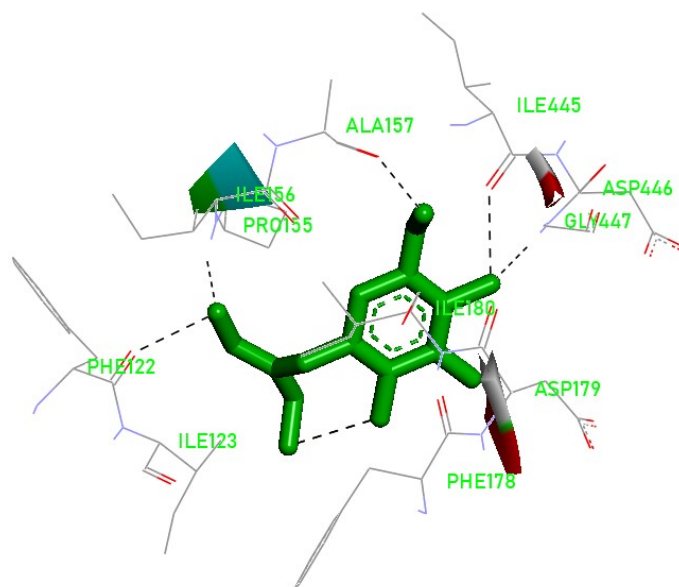

SR\_125:

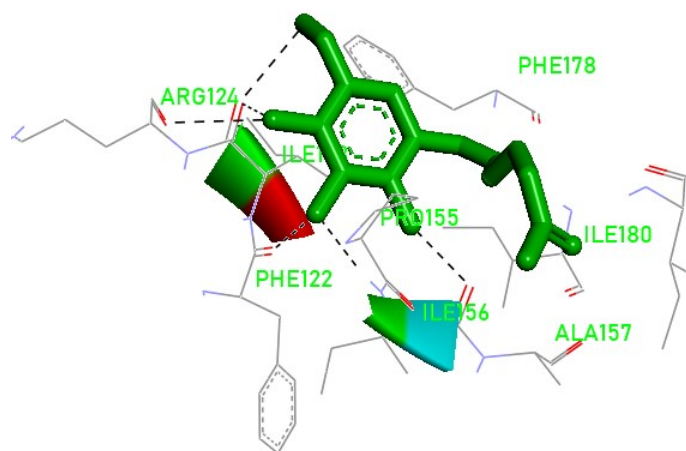

SR\_126:

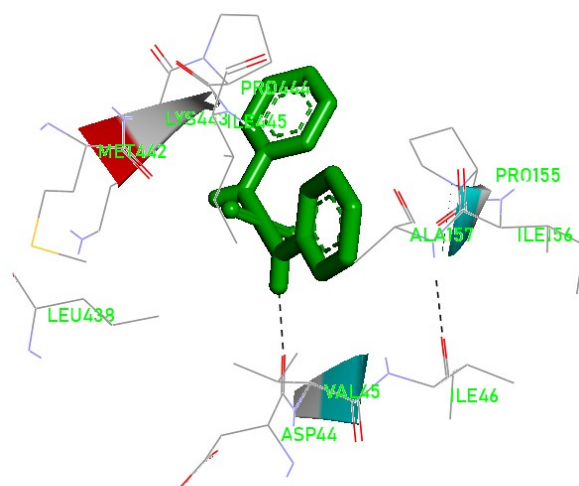

SR\_127:

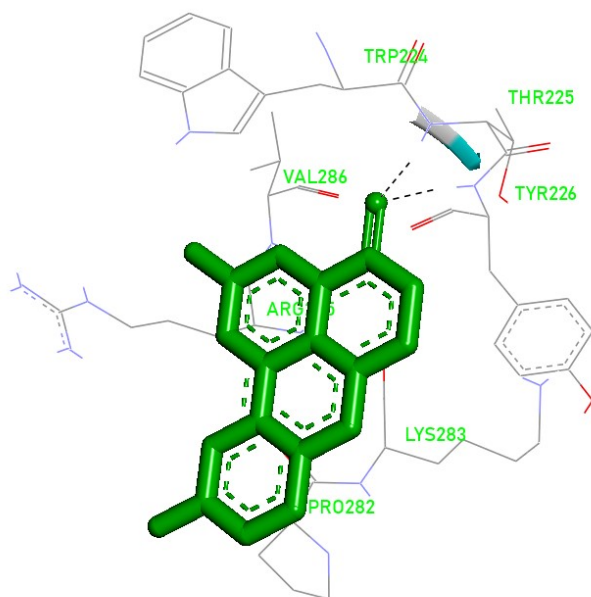

SR\_128:

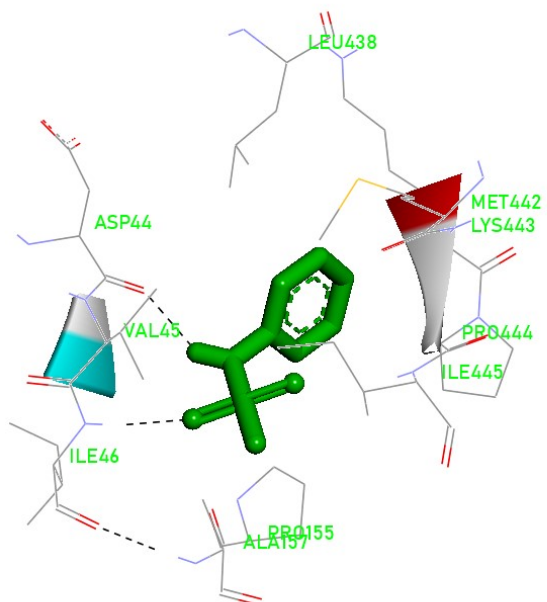



SR\_129:

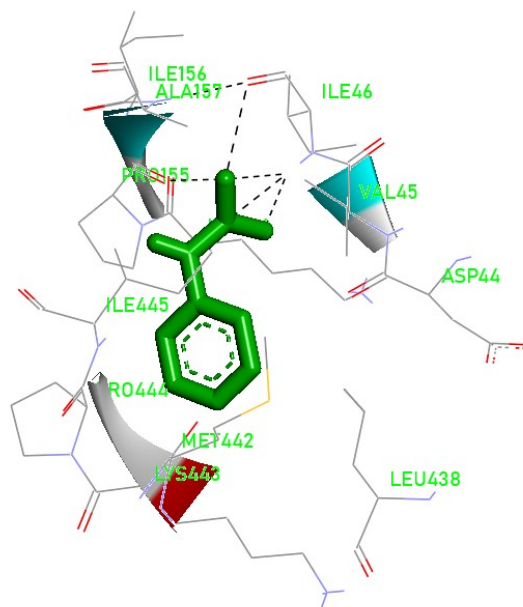

SR\_130:

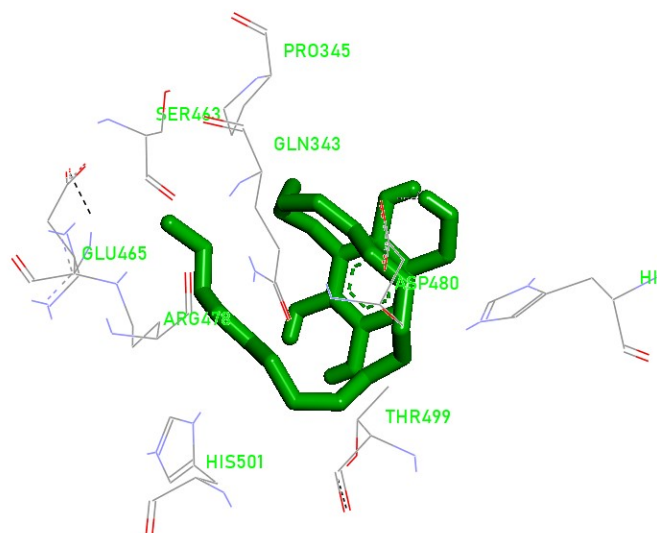

SR\_131:

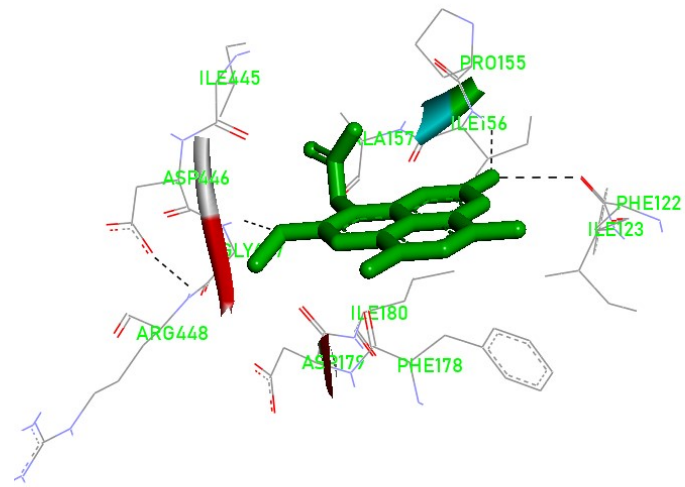

SR\_132:

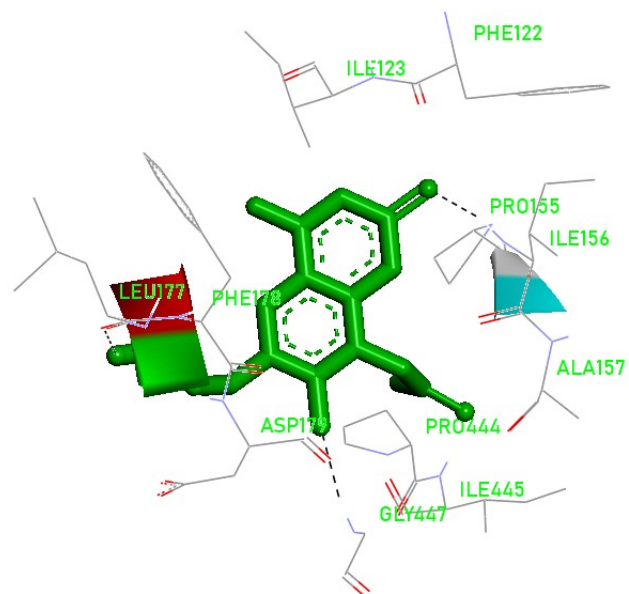

SR\_133:

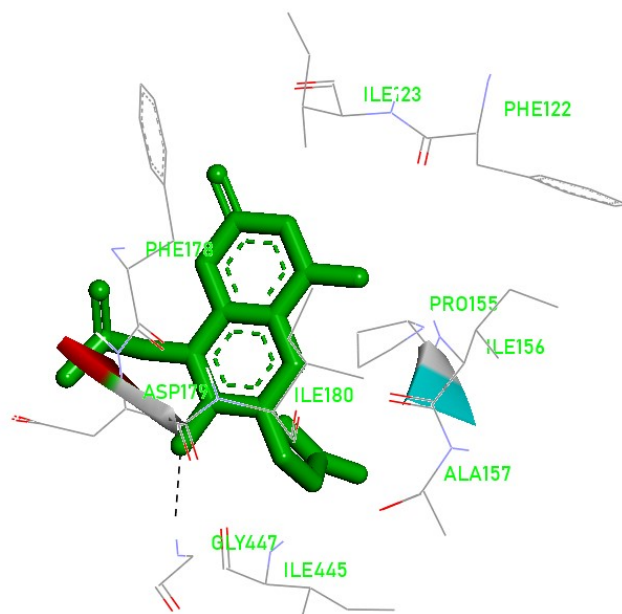

SR\_134:

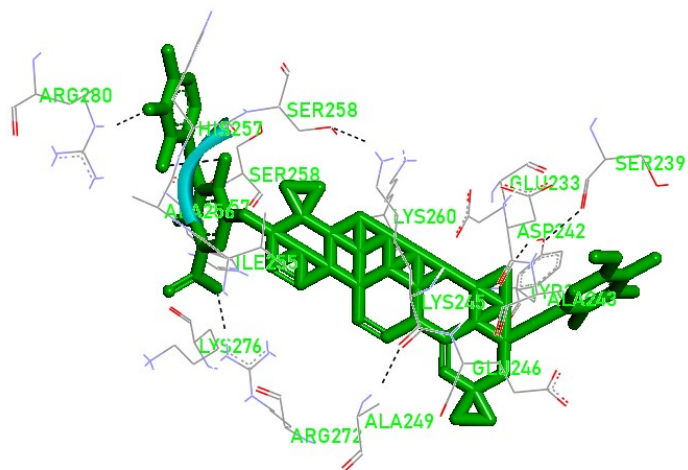

SR\_135:

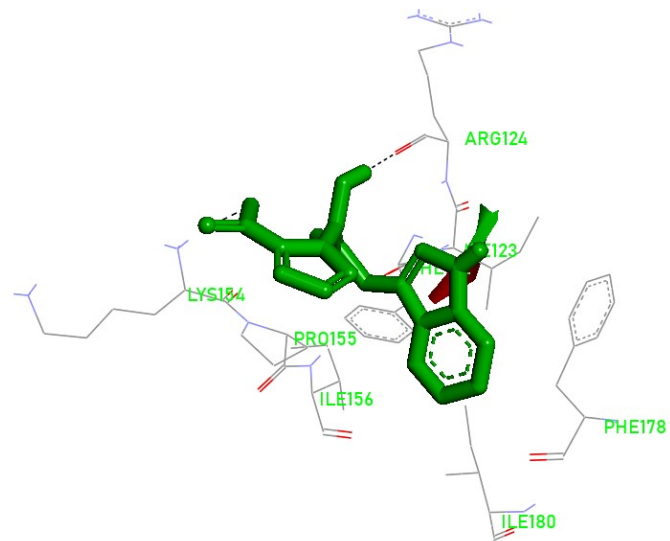

SR\_136:

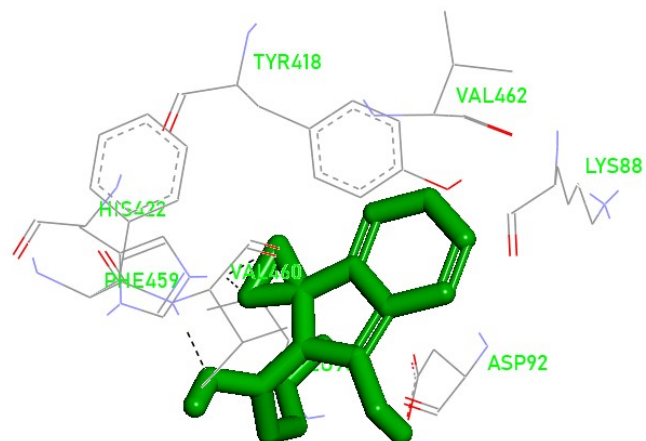

SR\_137:

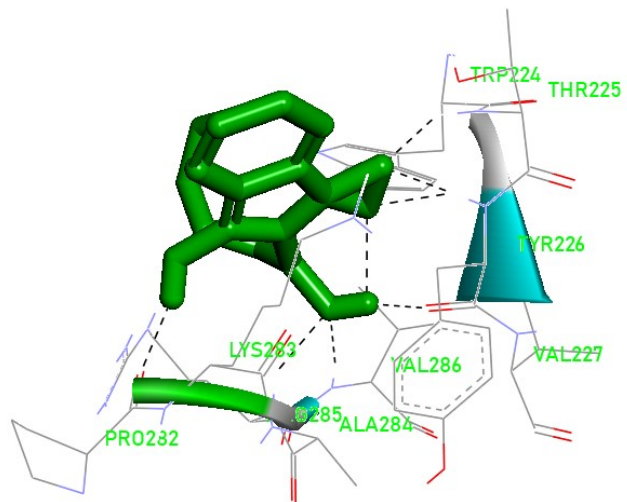

SR\_138:

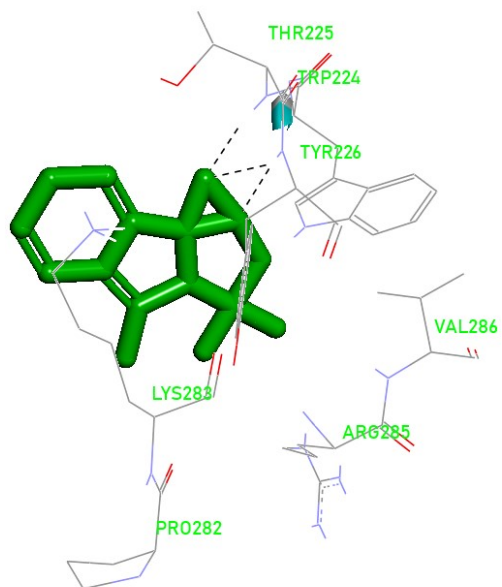

SR\_139:

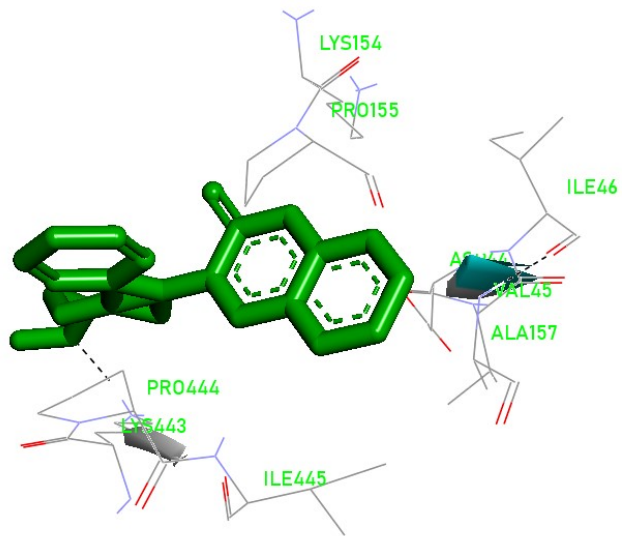

SR\_140:

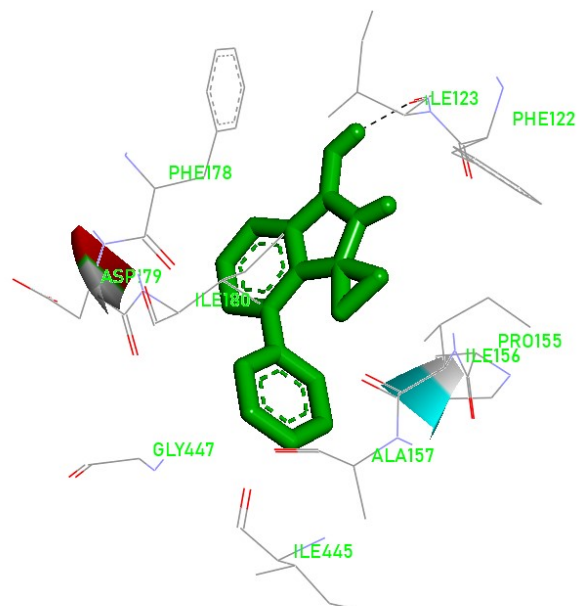

SR\_141:

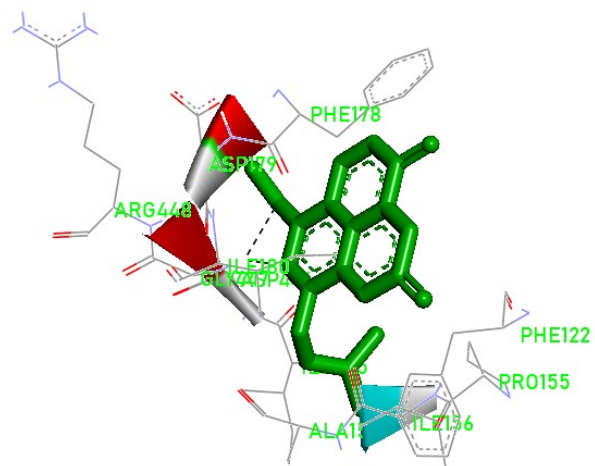

SR\_142:

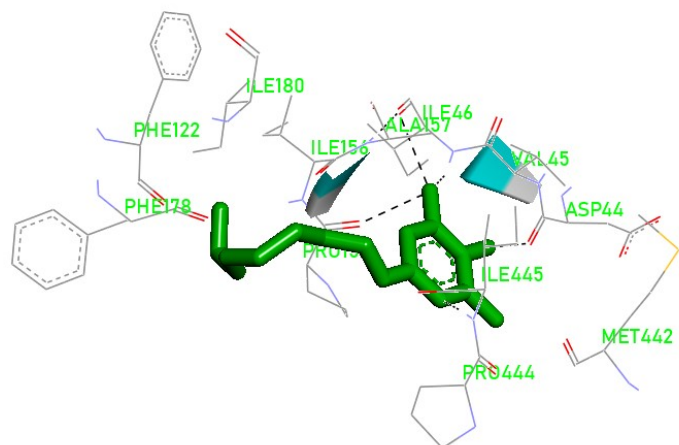

SR\_143:

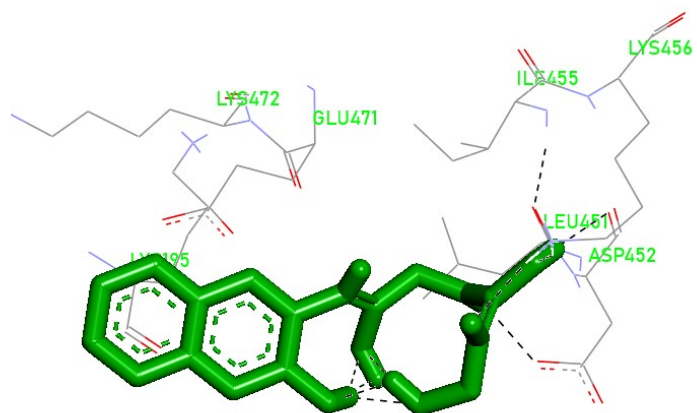

SR\_144:

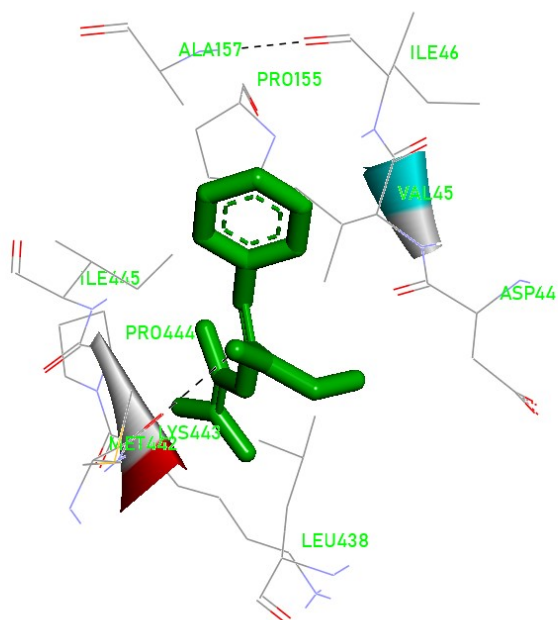



SR\_145:

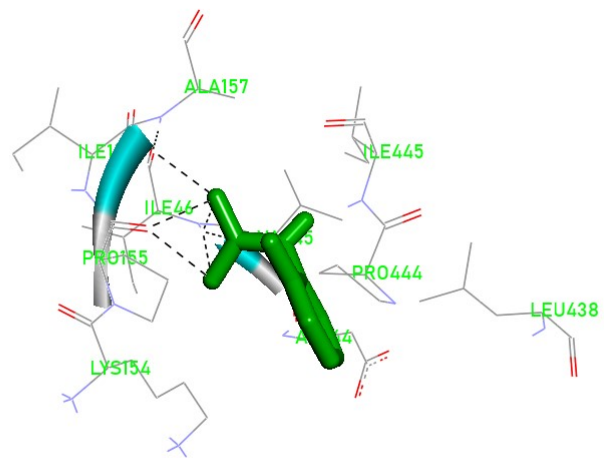

SR\_146:

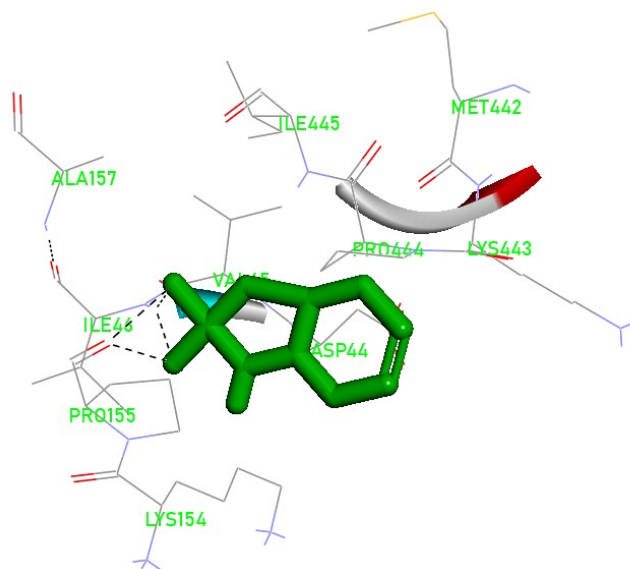

SR\_147:

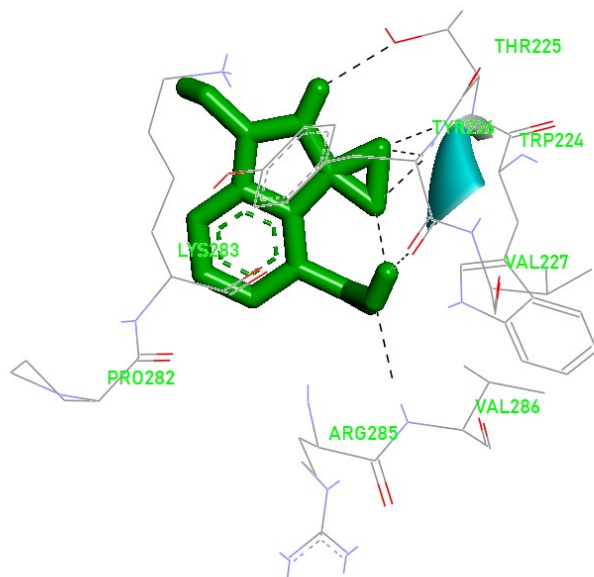

SR\_148:

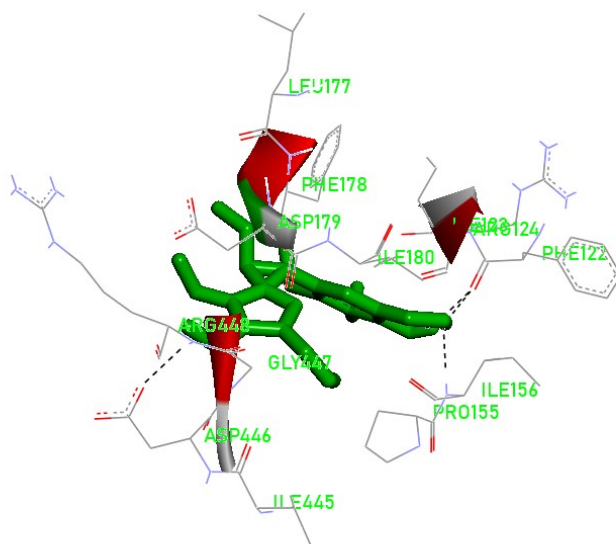

SR\_149:

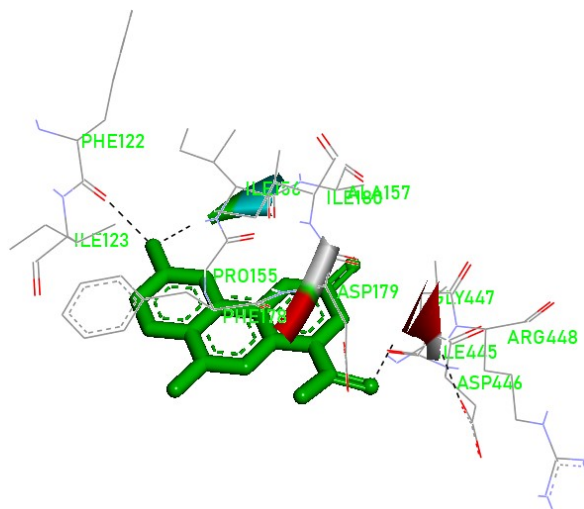

SR\_150:

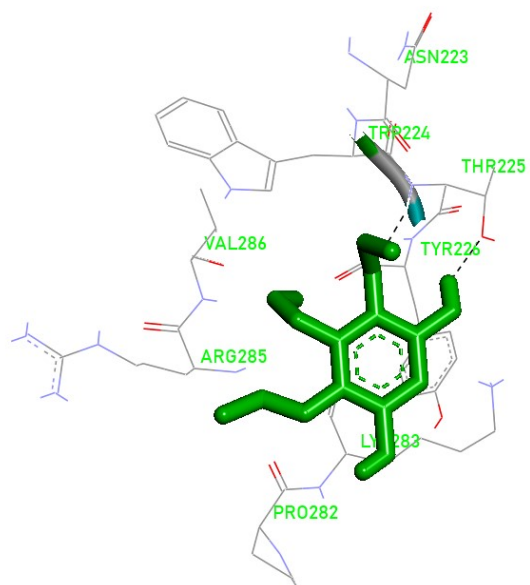

SR\_151:

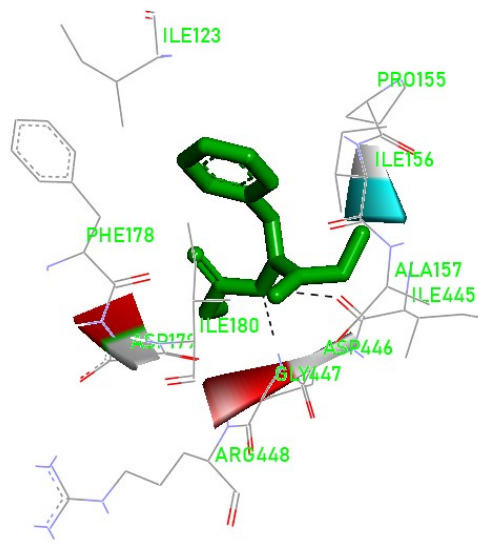

SR\_152:

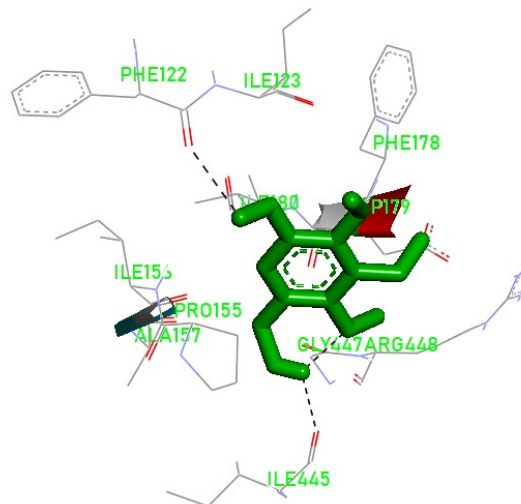

SR\_153:

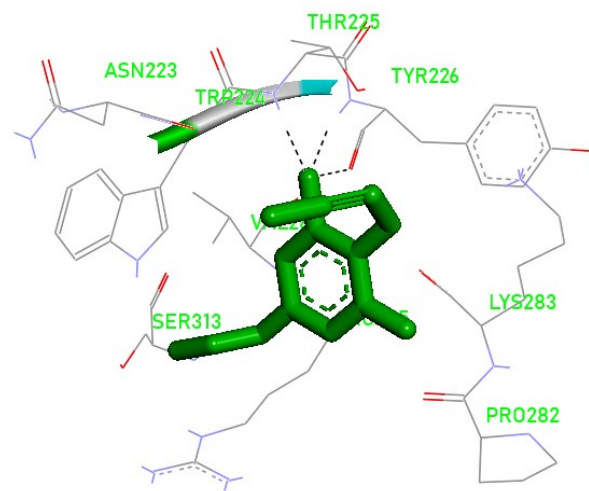

SR\_154:

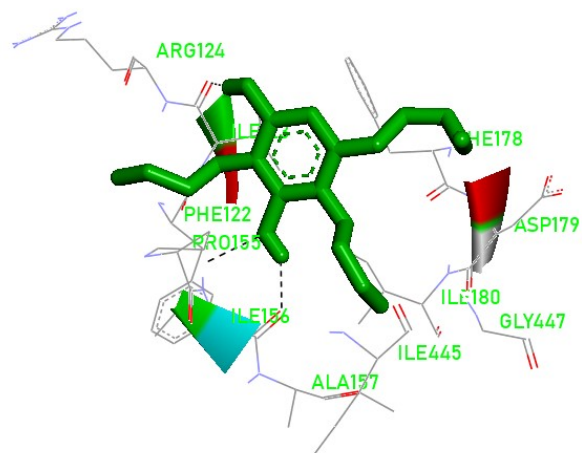

SR\_155:

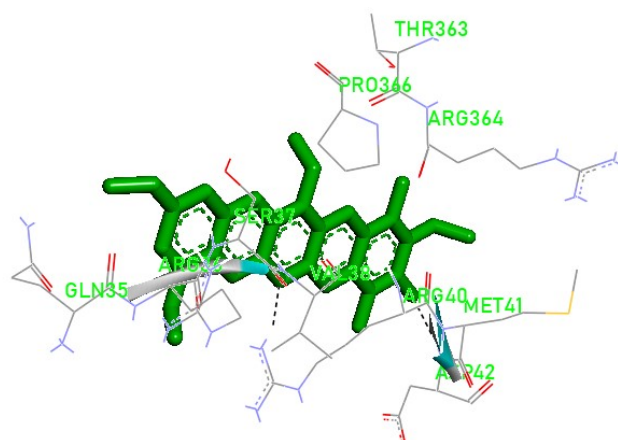

SR\_156:

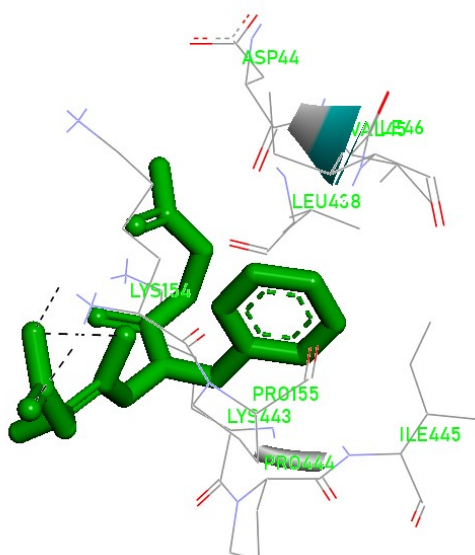

SR\_157:

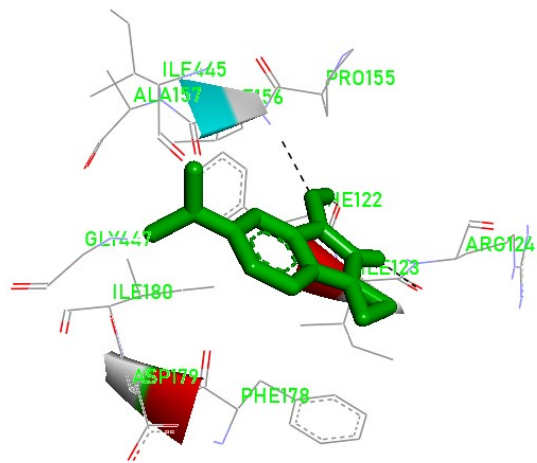

SR\_158:

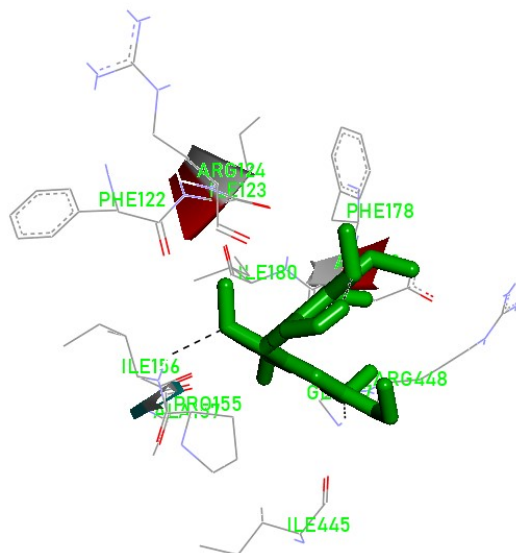

SR\_159:

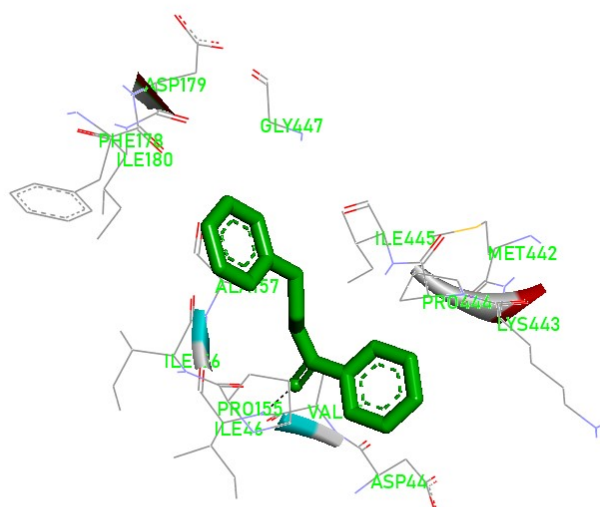

SR\_160:

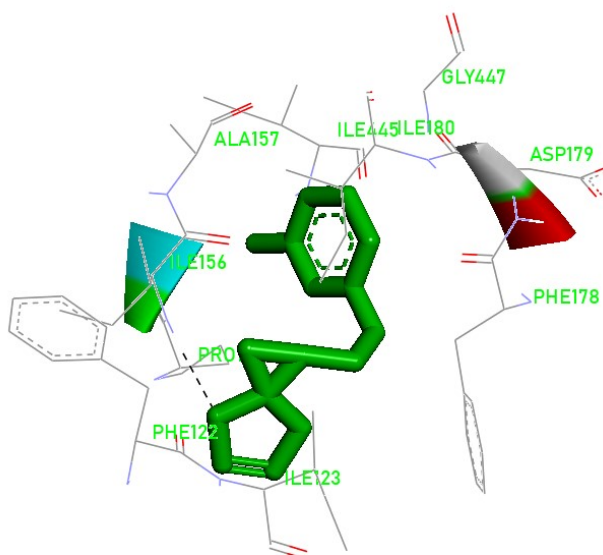



SR\_161:

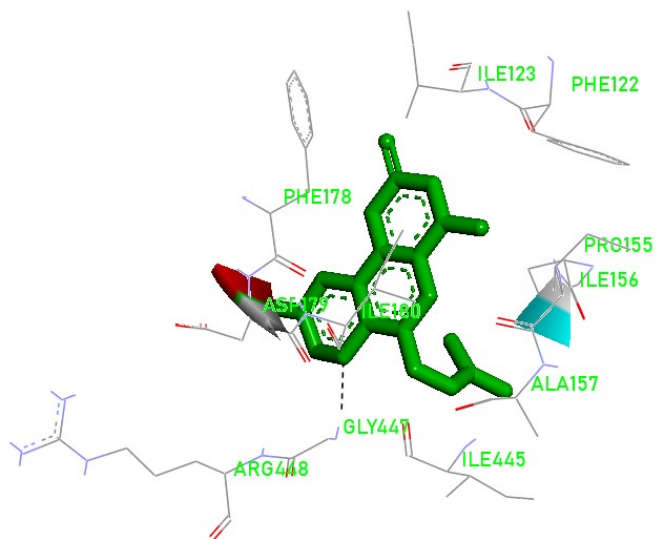

SR\_162:

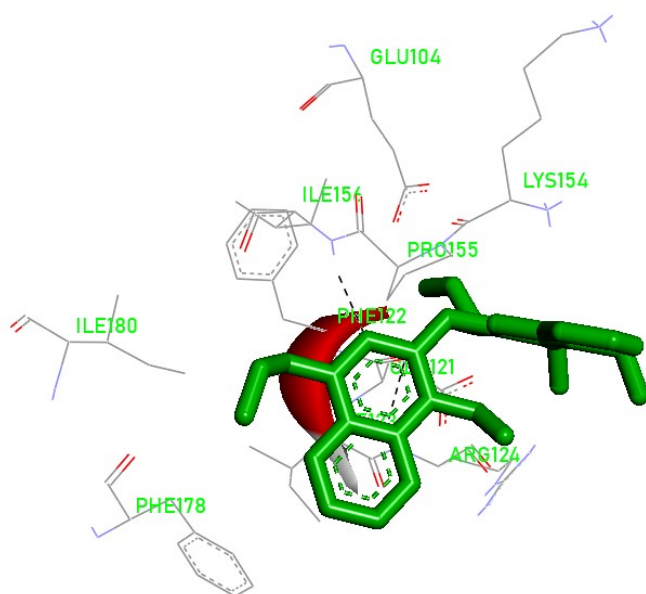

SR\_163:

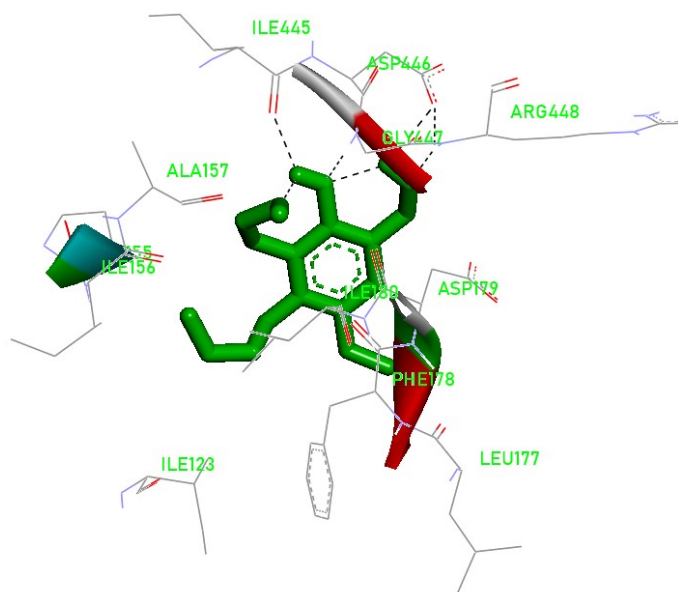

SR\_164:

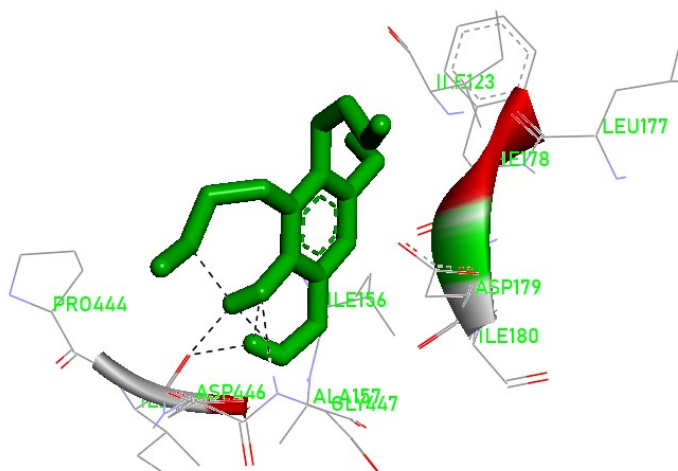

SR\_165:

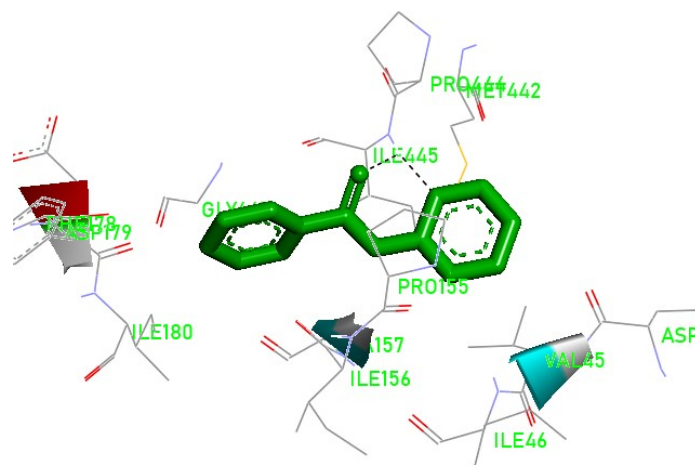

SR\_166:

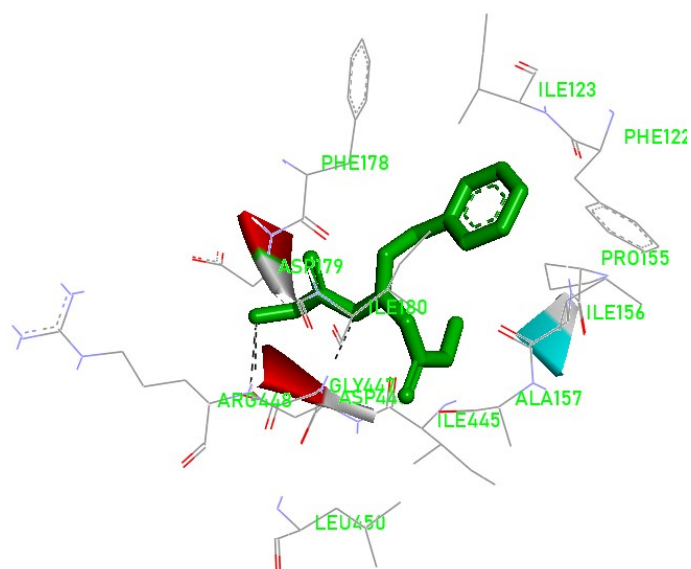

SR\_167:

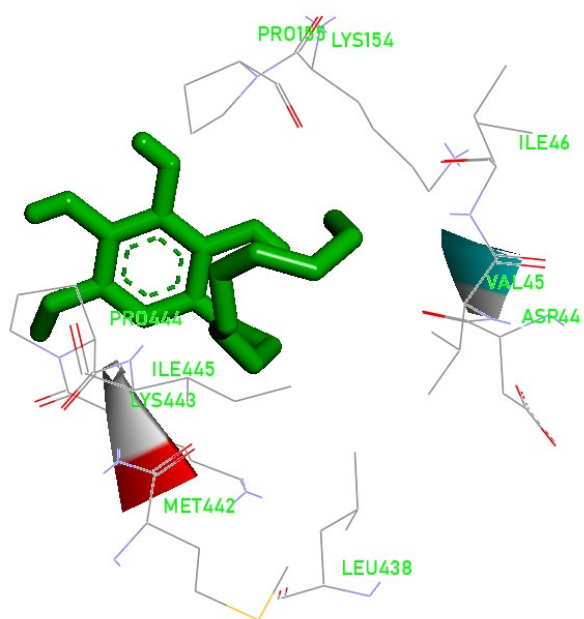

SR\_168:

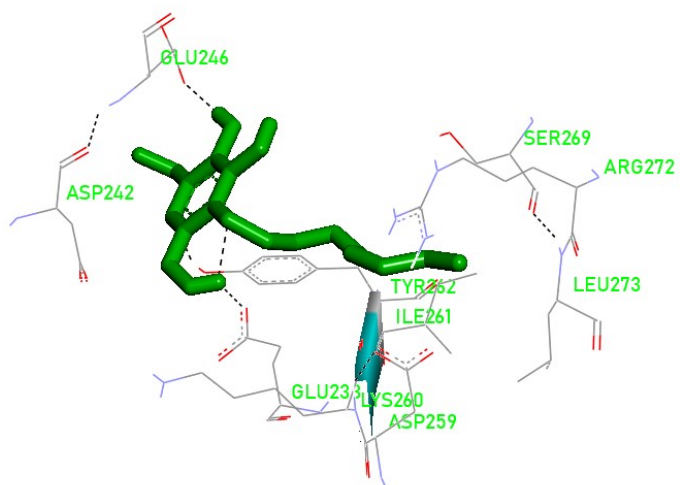

SR\_169:

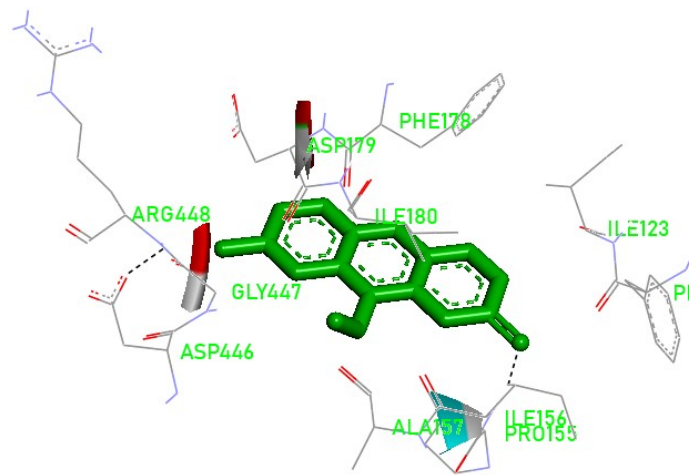

Supplement: d2fo00544a1.pdf [file d2fo00544a1.pdf]
