# Supplementary material for: Identification of novel umami molecules via QSAR models and molecular docking
Source: Royal Society of Chemistry journal article supplement (doi:10.1039/d2fo00544a), 2022-01-01

The ligands in the 169 docking results below correspond to the molecules in Table S3. For example, “T2R1\_1” represents the docking result of bitter taste receptor and the first molecule in Table S3.

T2R1\_1:

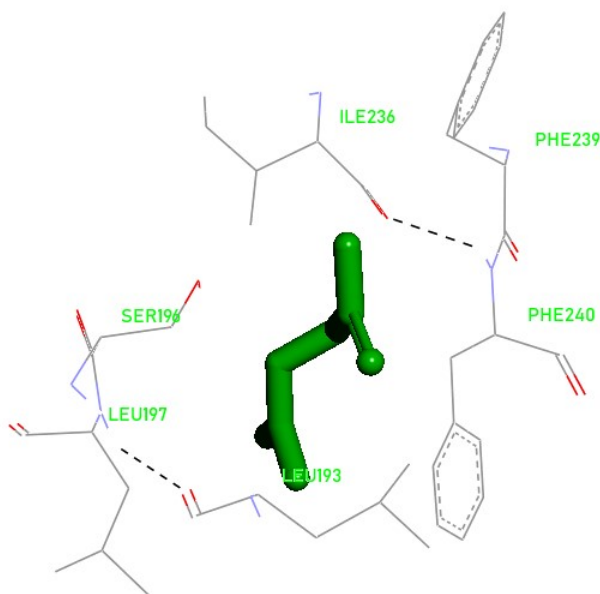

T2R1\_2:

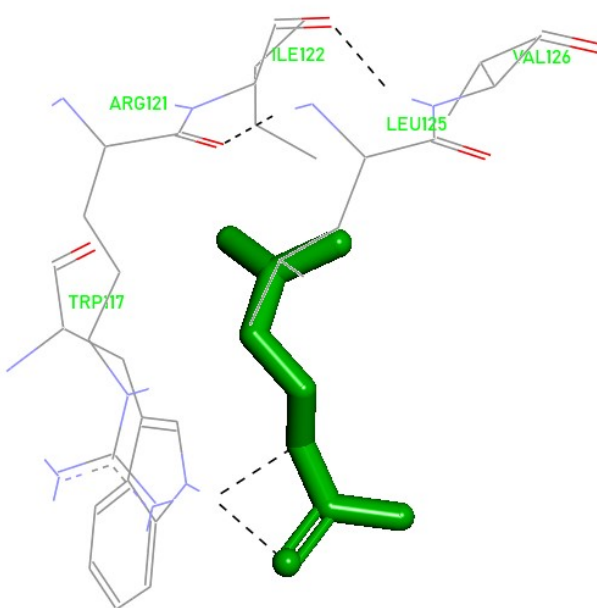

T2R1\_3:

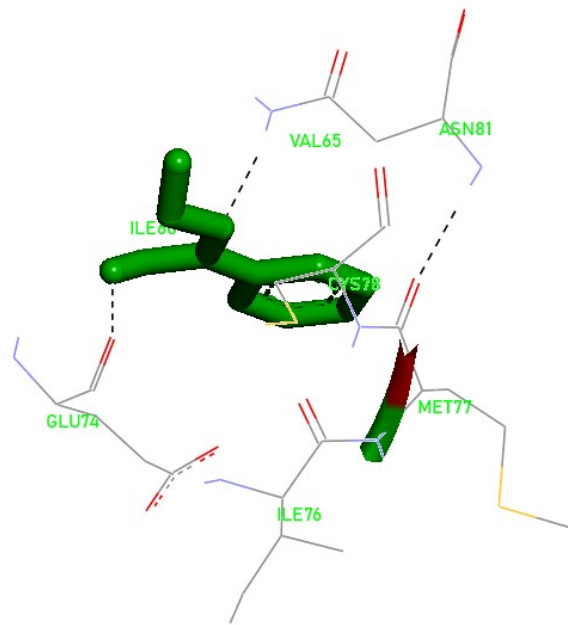

T2R1\_4:

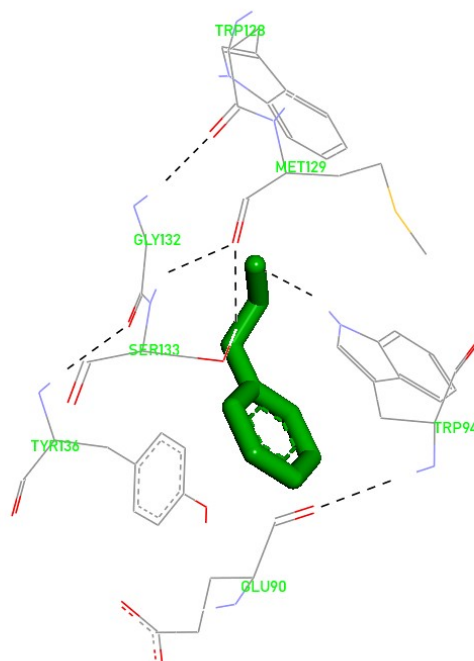

T2R1\_5:

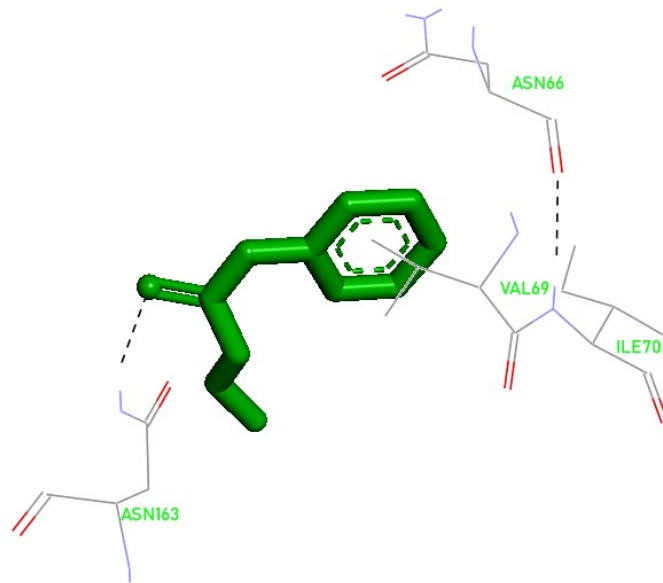

T2R1\_6:

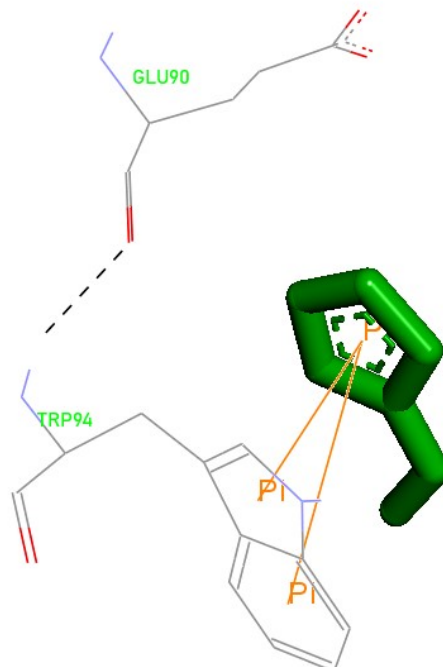

T2R1\_7:

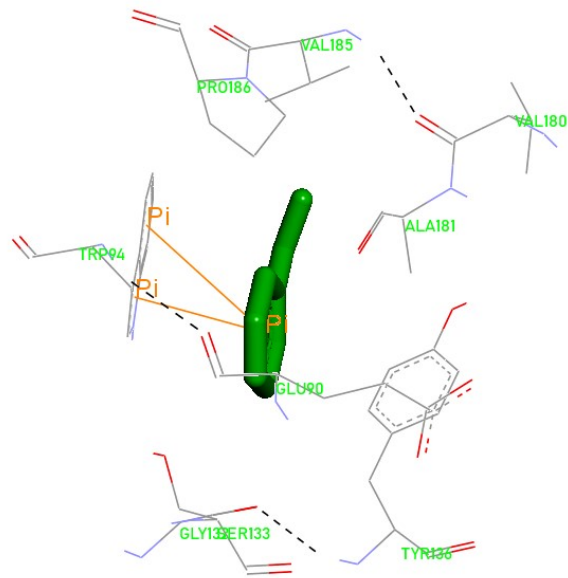

T2R1\_8:

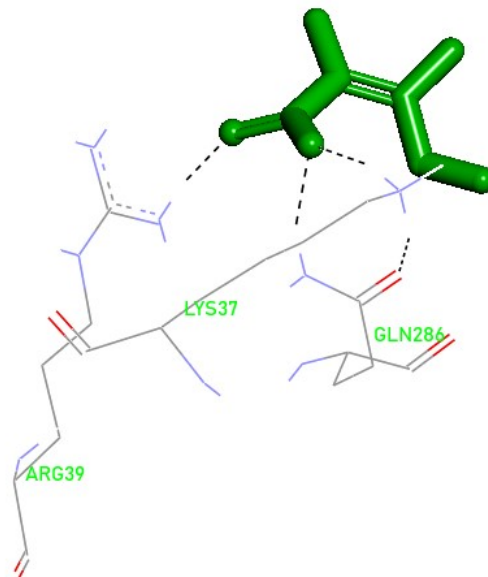

T2R1\_9:

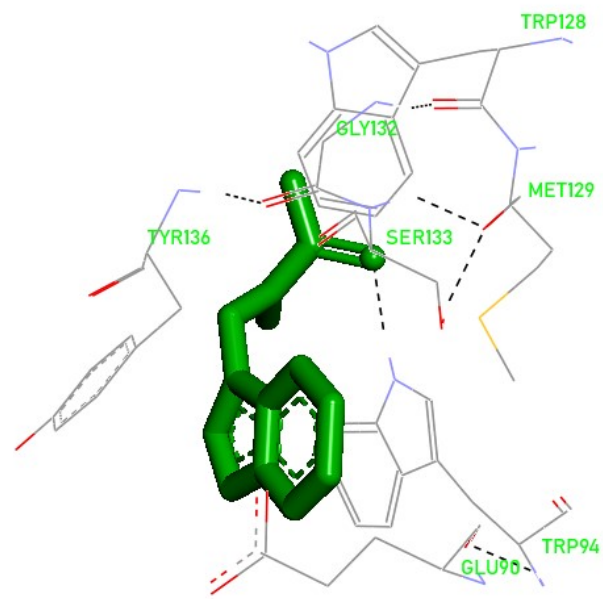

T2R1\_10:

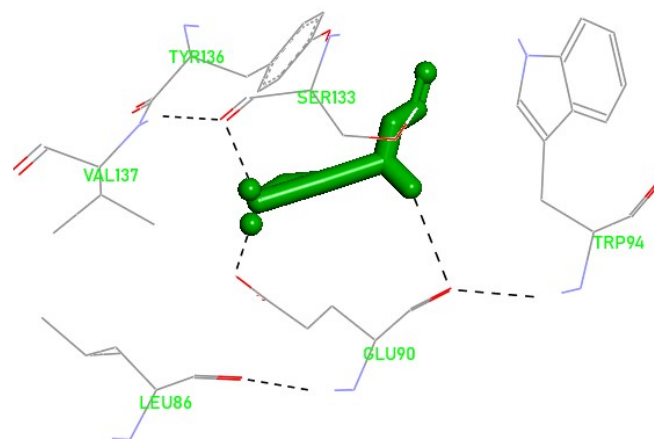

T2R1\_11:

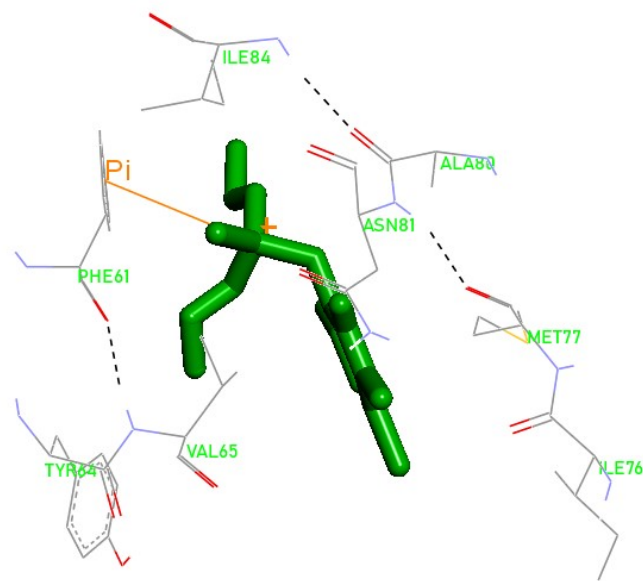

T2R1\_12:

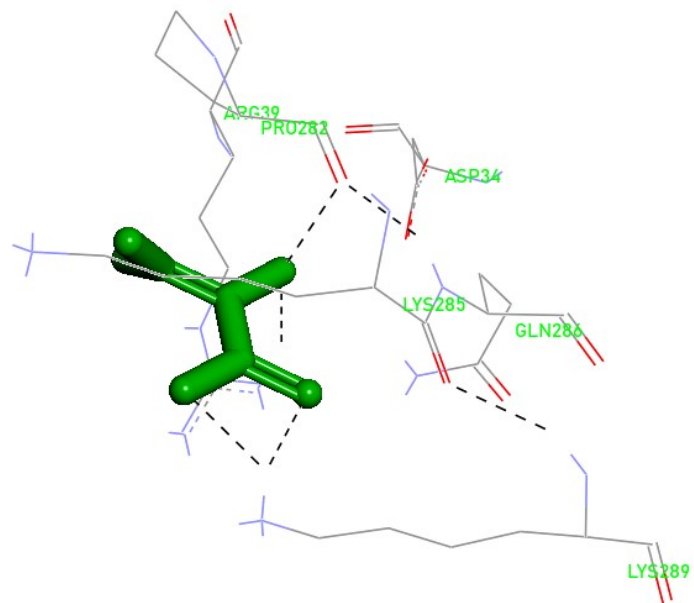

T2R1\_13:

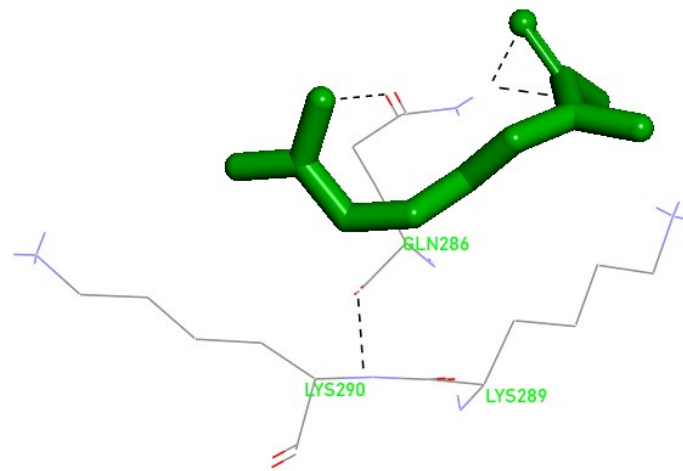

T2R1\_14:

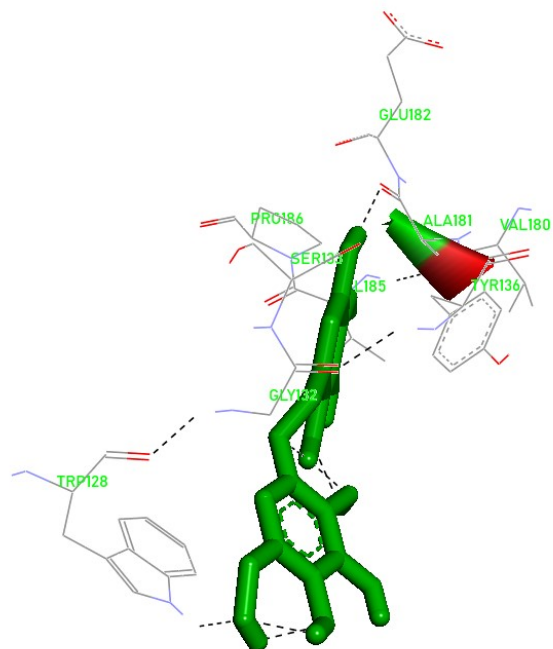

T2R1\_15:

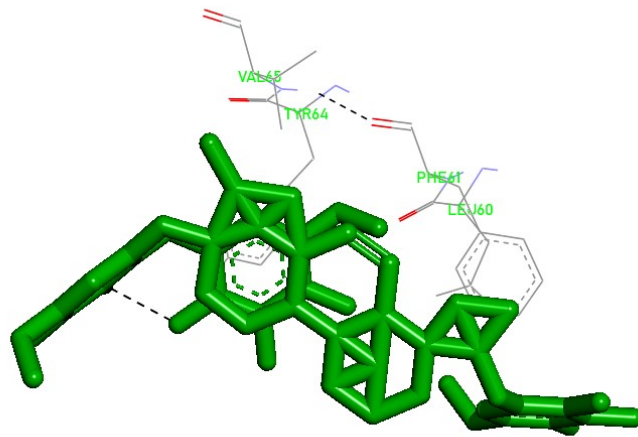

T2R1\_16:

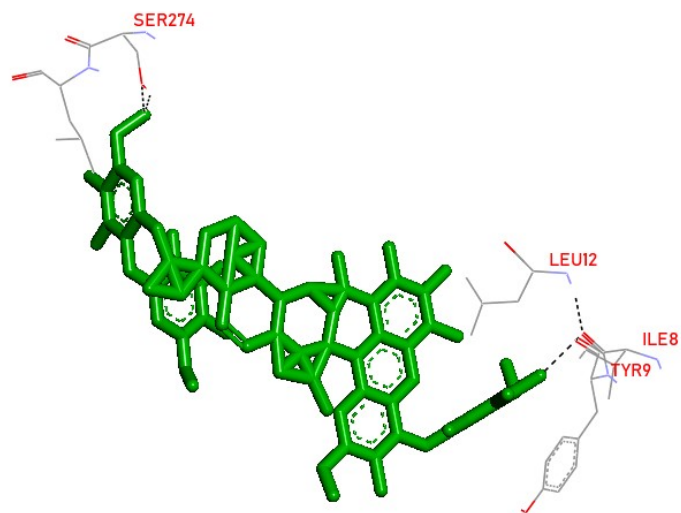



T2R1\_17:

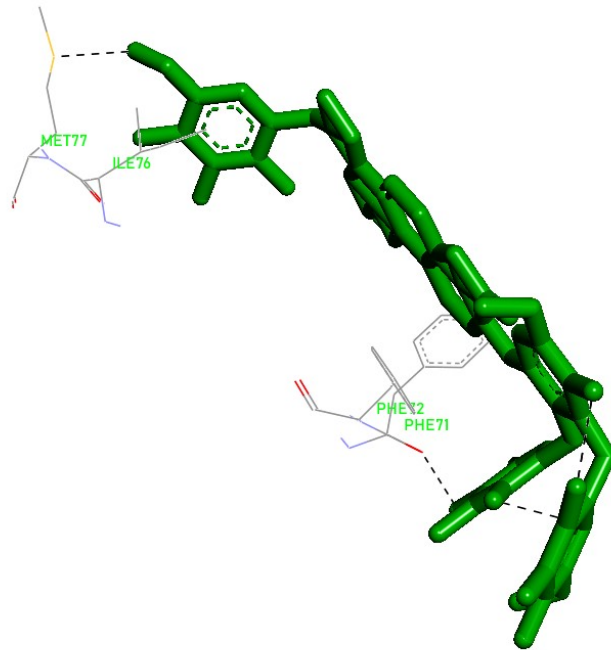

T2R1\_18:

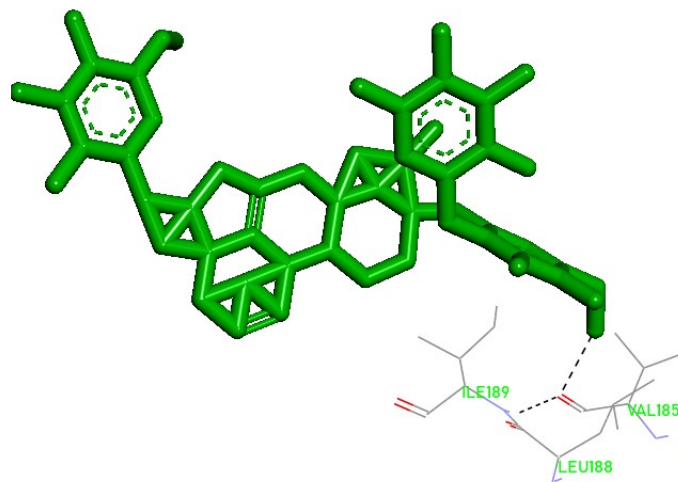

T2R1\_19:

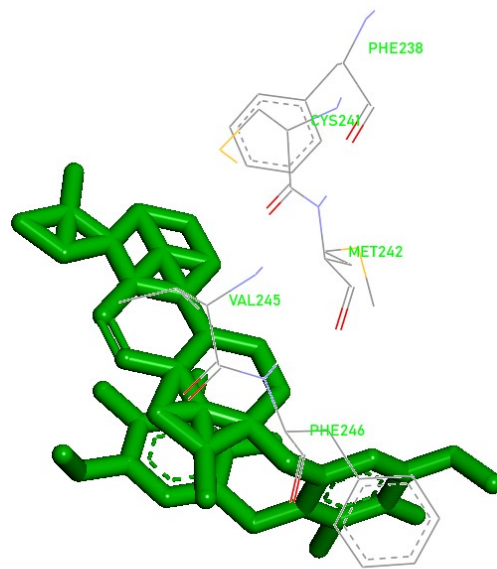

T2R1\_20:

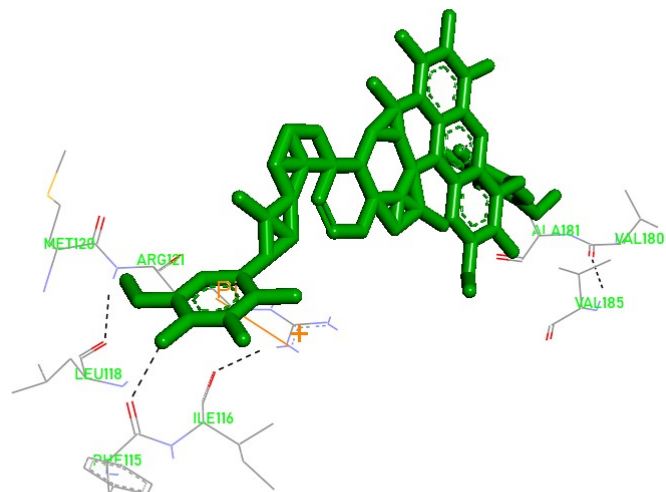

T2R1\_21:

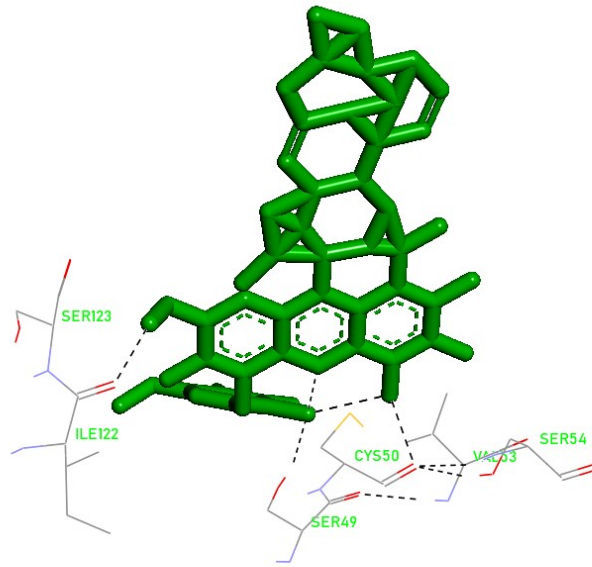

T2R1\_22:

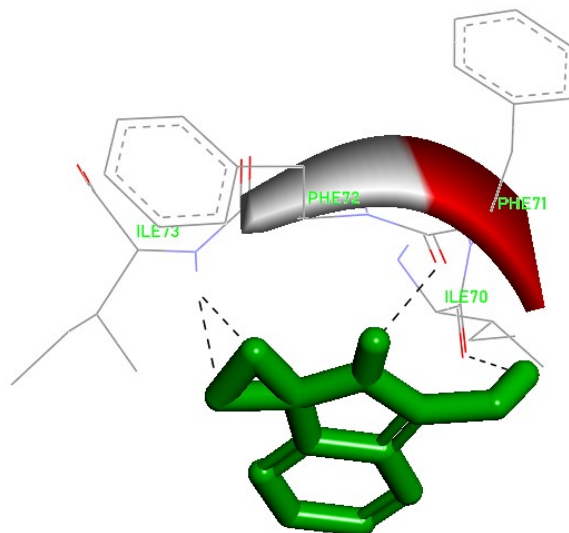

T2R1\_23:

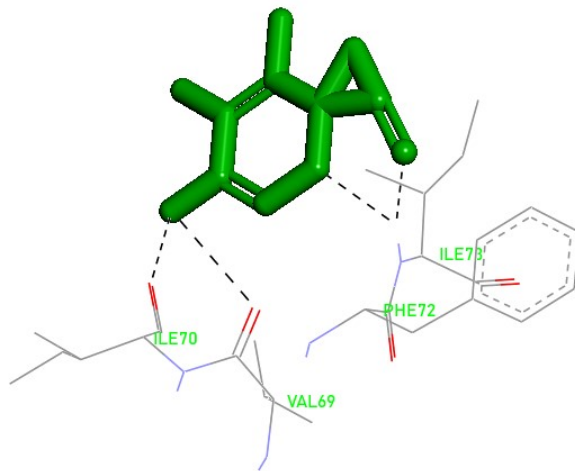

T2R1\_24:

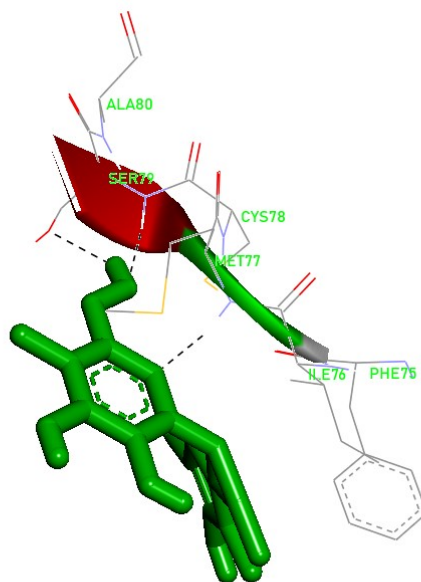

T2R1\_25:

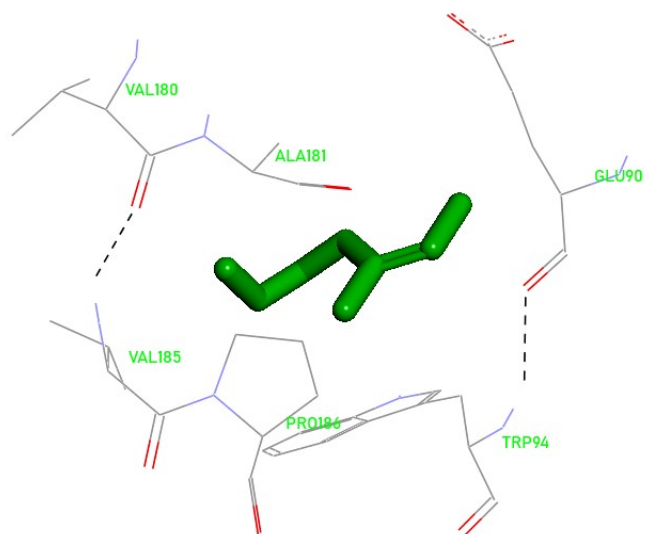

T2R1\_26:

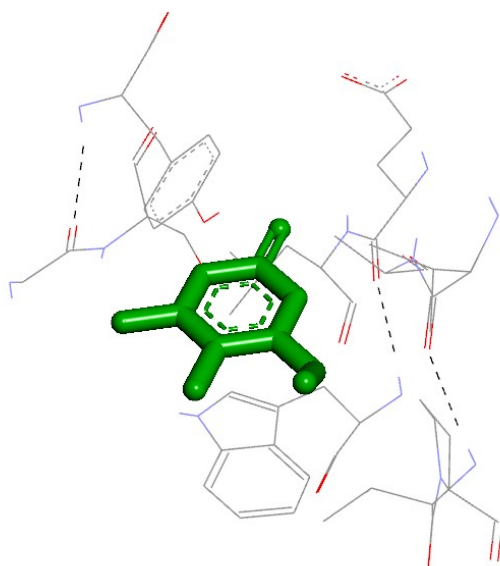

T2R1\_27:

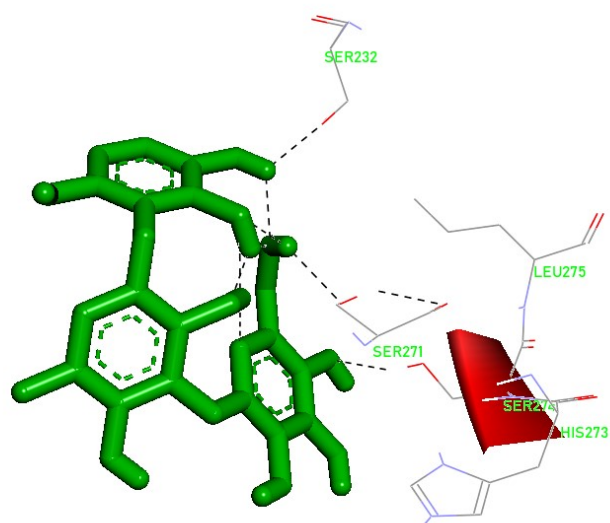

T2R1\_28:

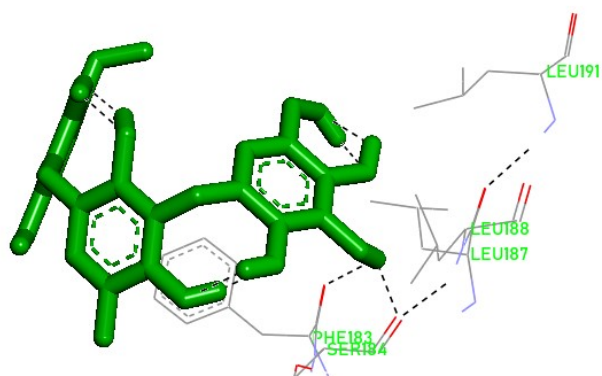

T2R1\_29:

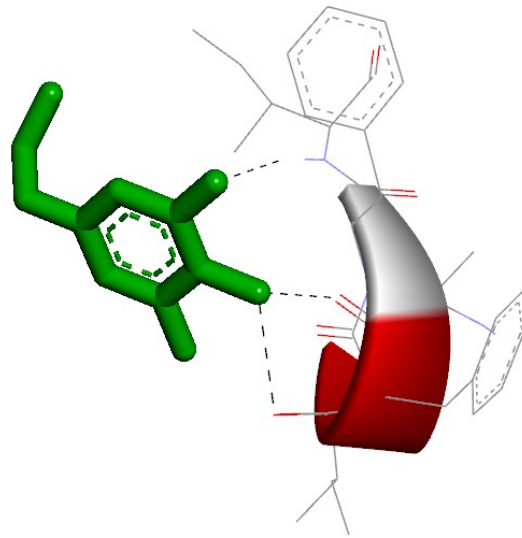

T2R1\_30:

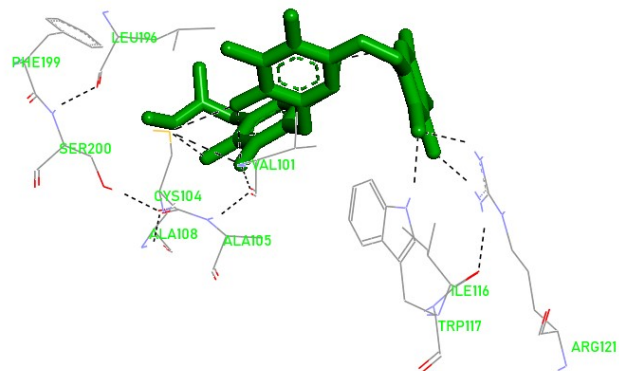

T2R1\_31:

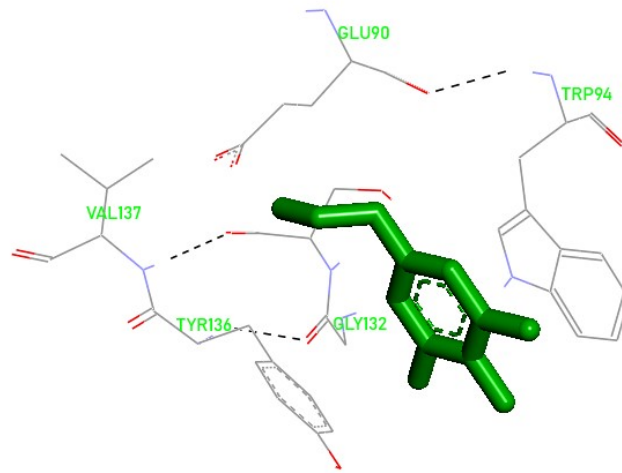

T2R1\_32:

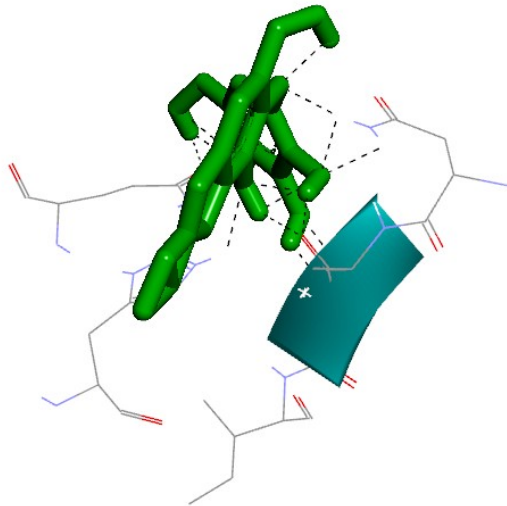



T2R1\_33:

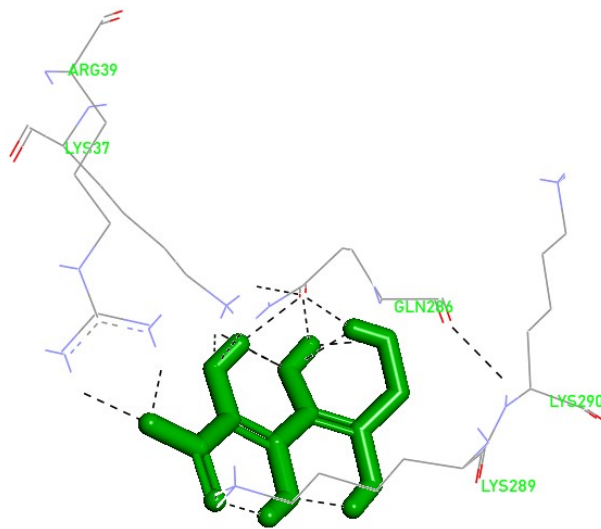

T2R1\_34:

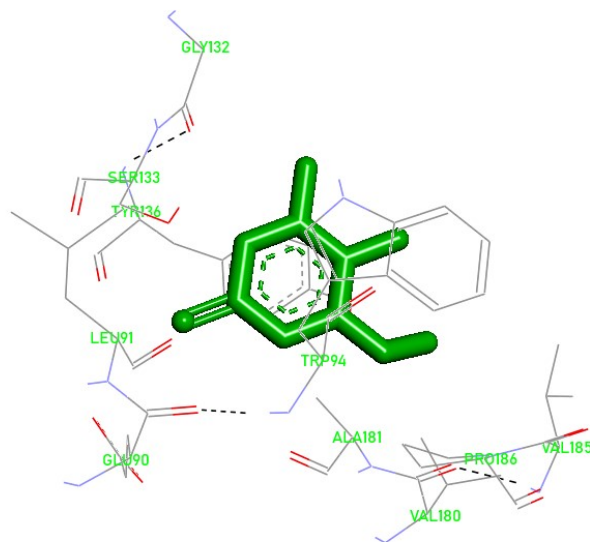

T2R1\_35:

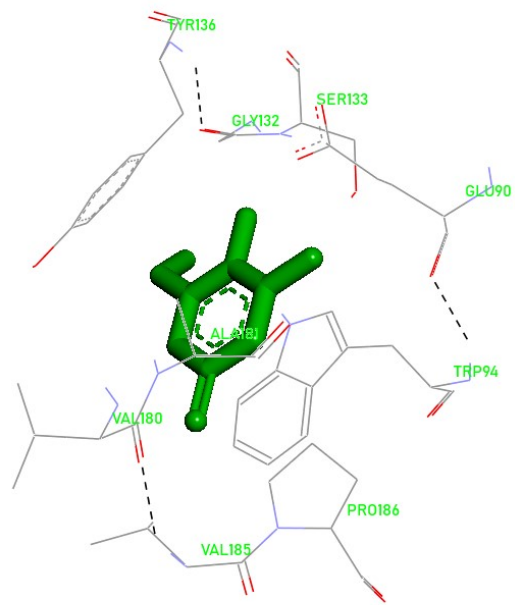

T2R1\_36:

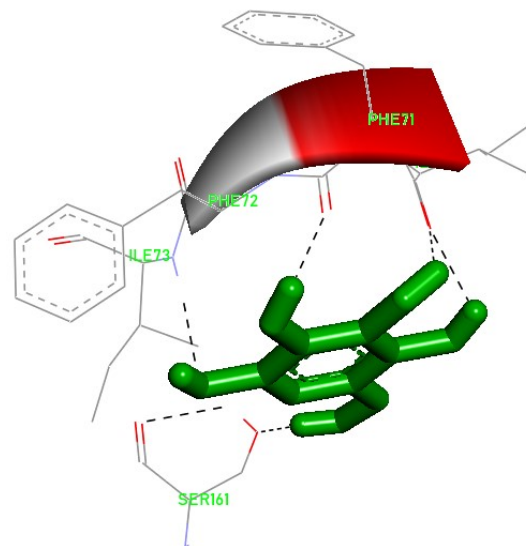

T2R1\_37:

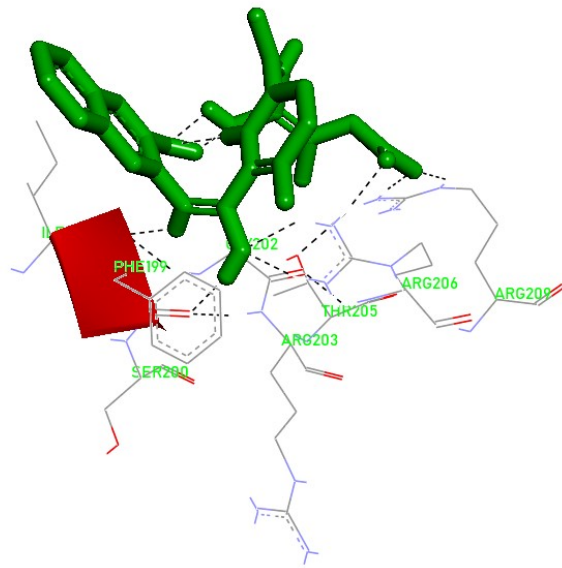

T2R1\_38:

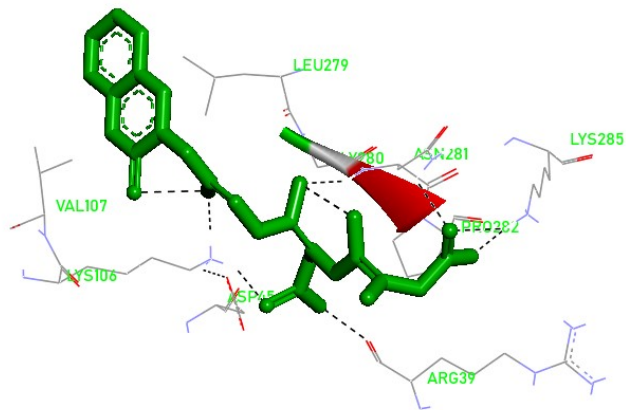

T2R1\_39:

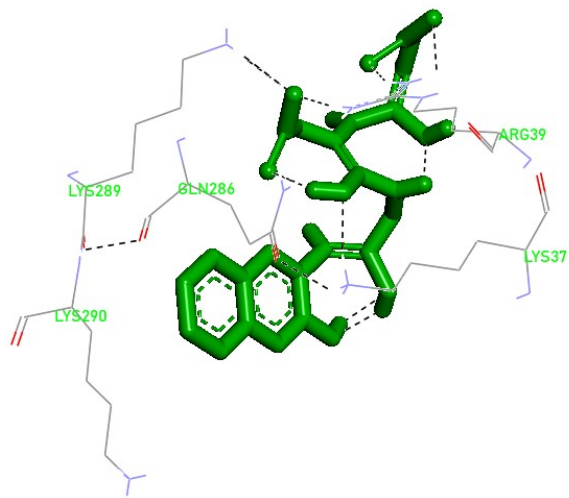

T2R1\_40:

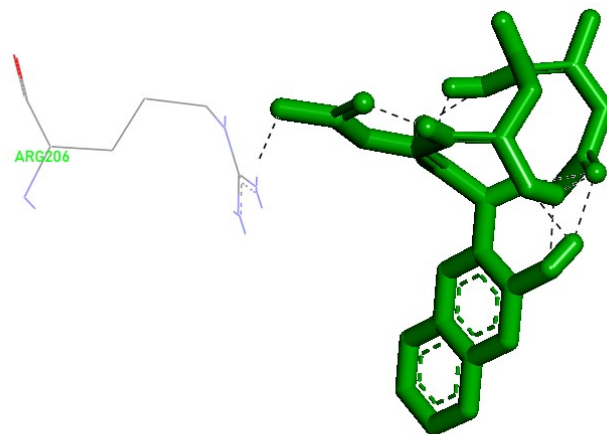

T2R1\_41:

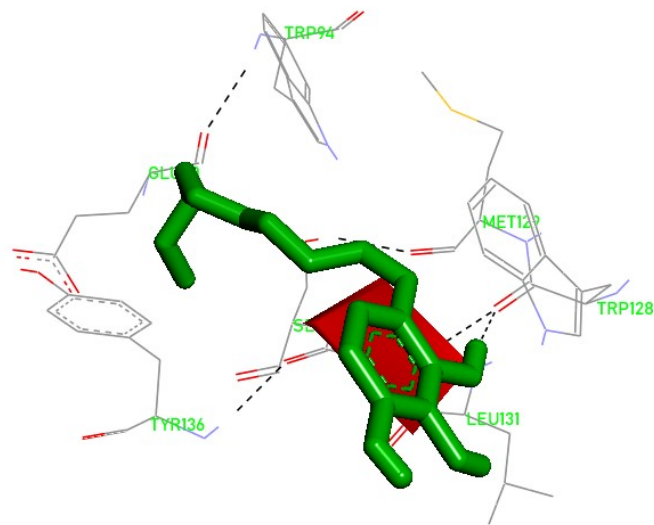

T2R1\_42:

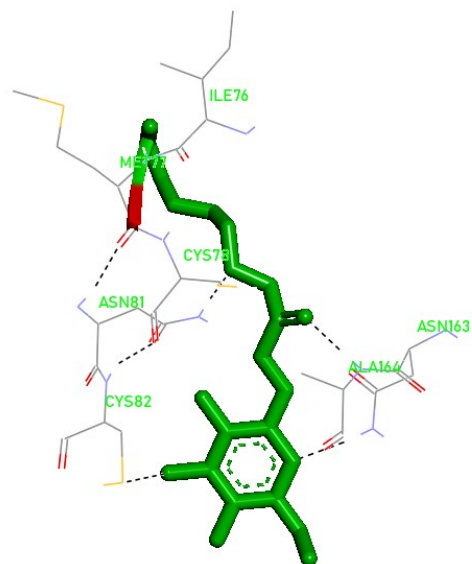

T2R1\_43:

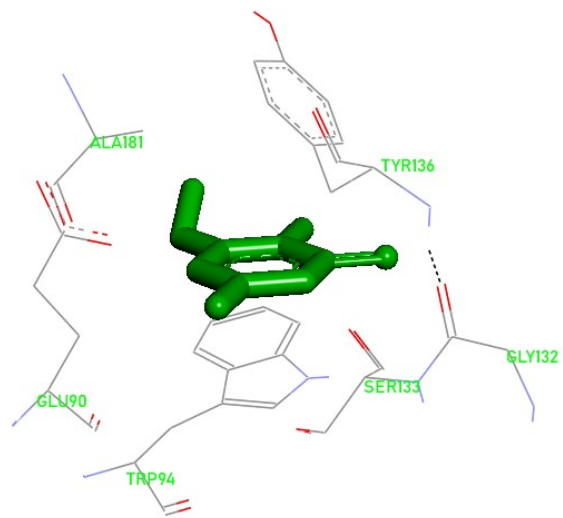

T2R1\_44:

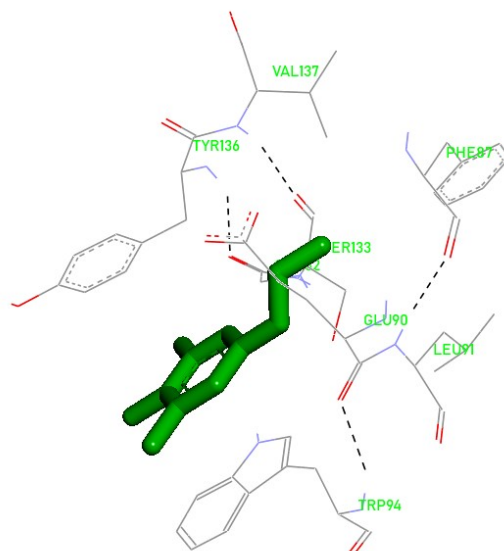

T2R1\_45:

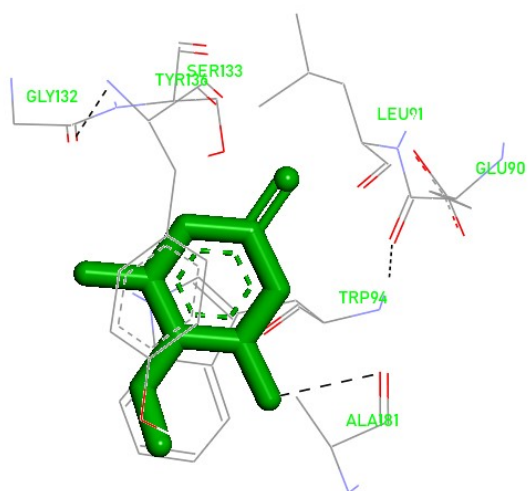

T2R1\_46:

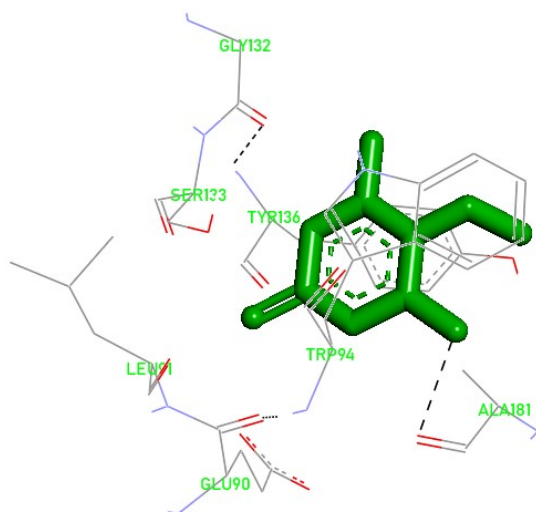

T2R1\_47:

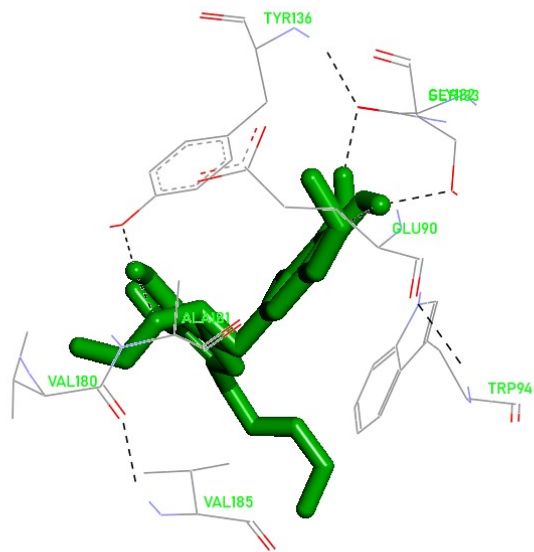

T2R1\_48:

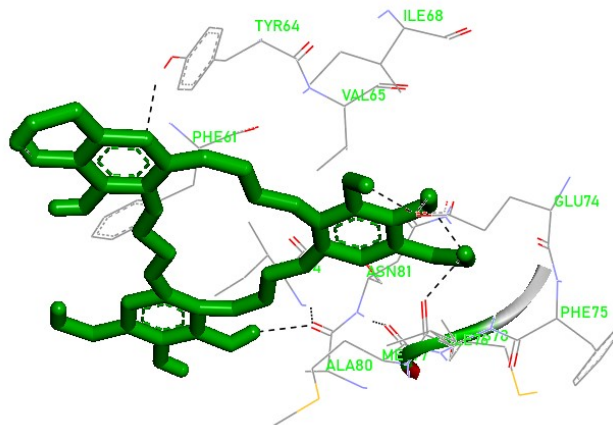



T2R1\_49:

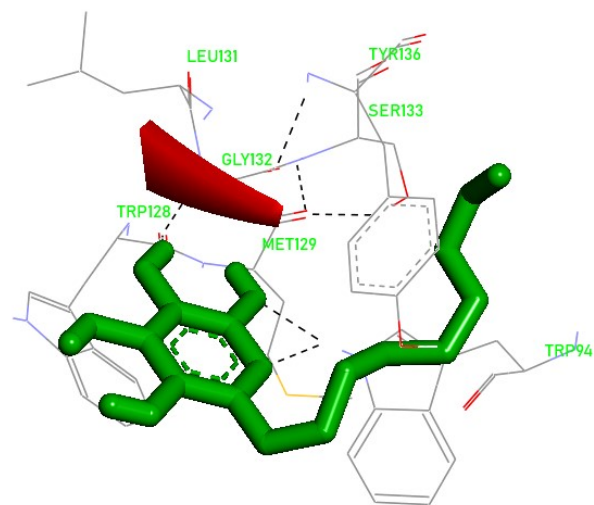

T2R1\_50:

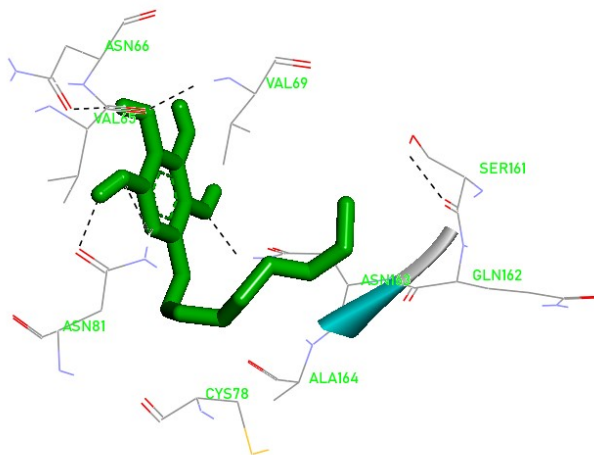

T2R1\_51:

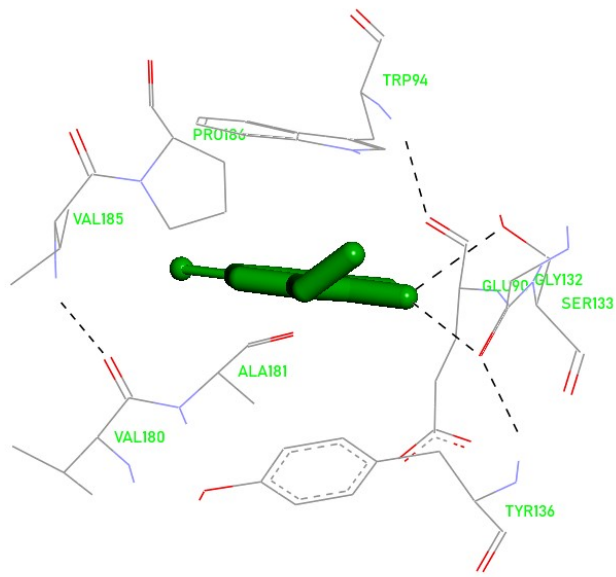

T2R1\_52:

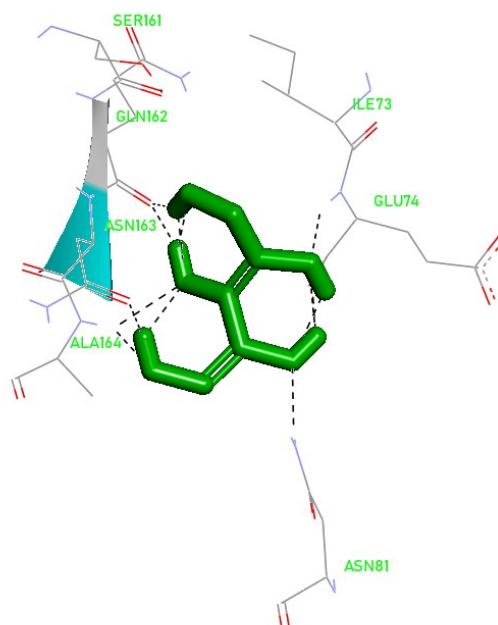

T2R1\_53:

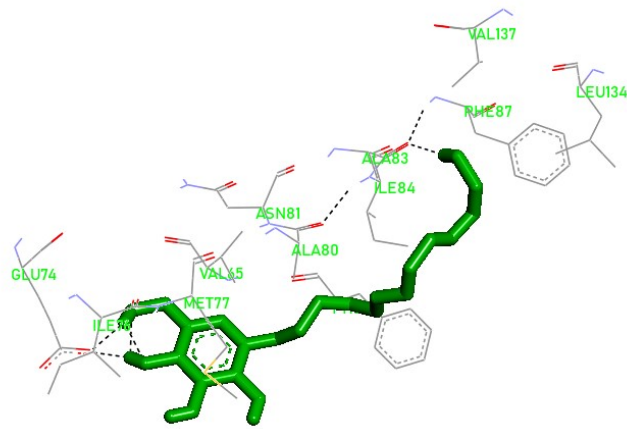

T2R1\_54:

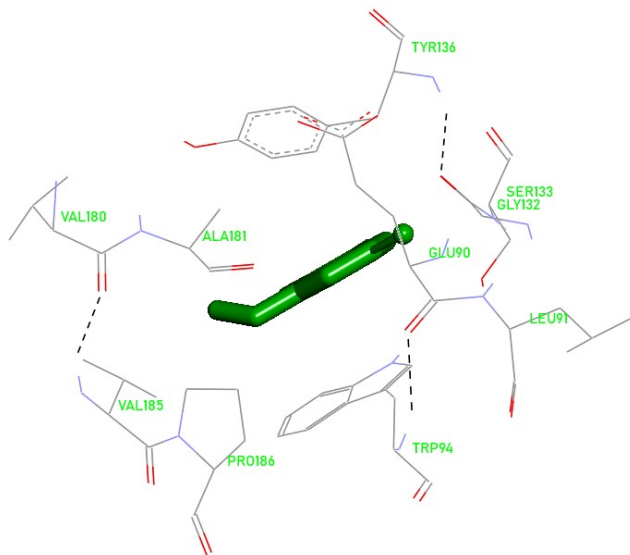

T2R1\_55:

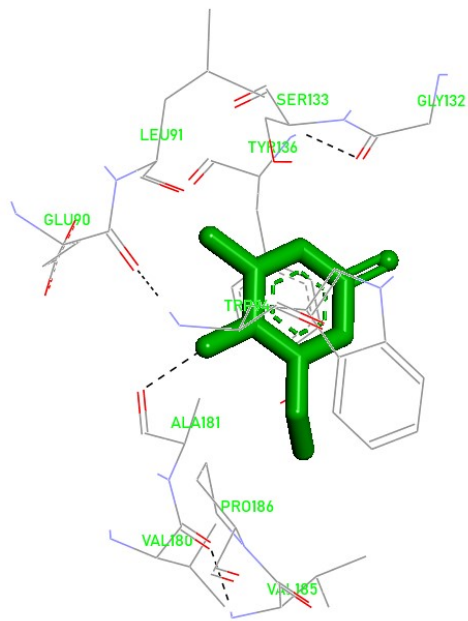

T2R1\_56:

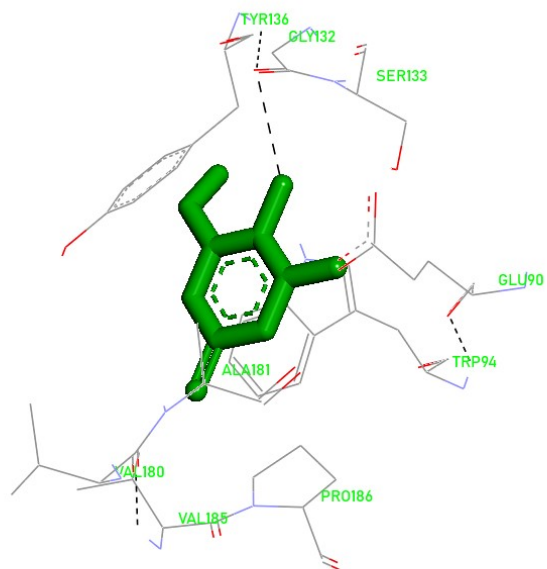

T2R1\_57:

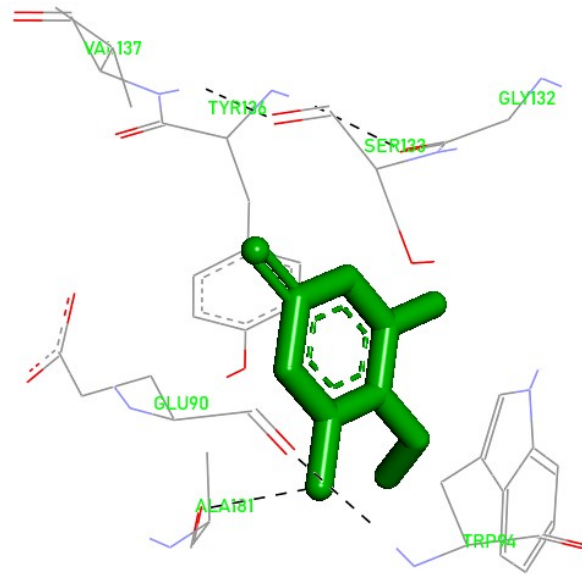

T2R1\_58:

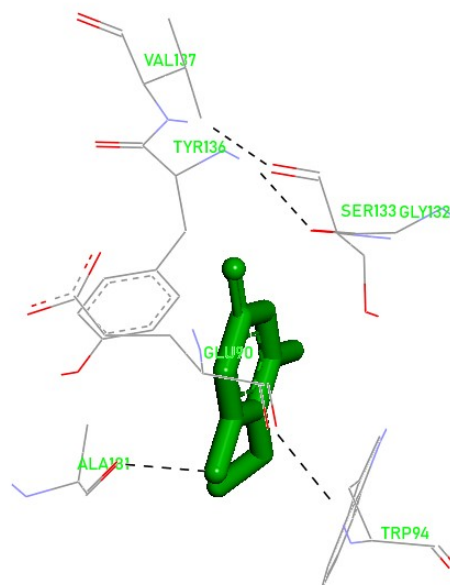

T2R1\_59:

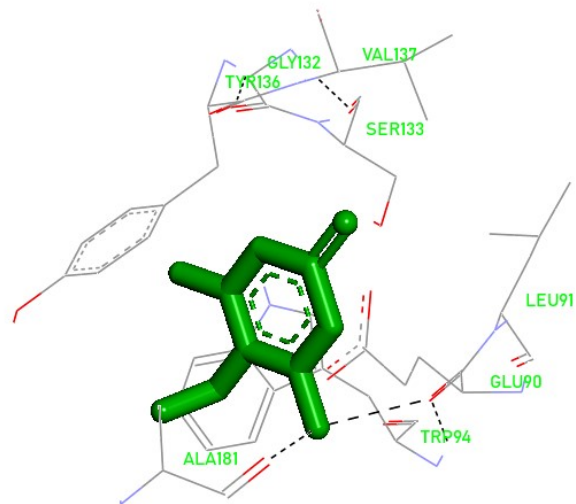

T2R1\_60:

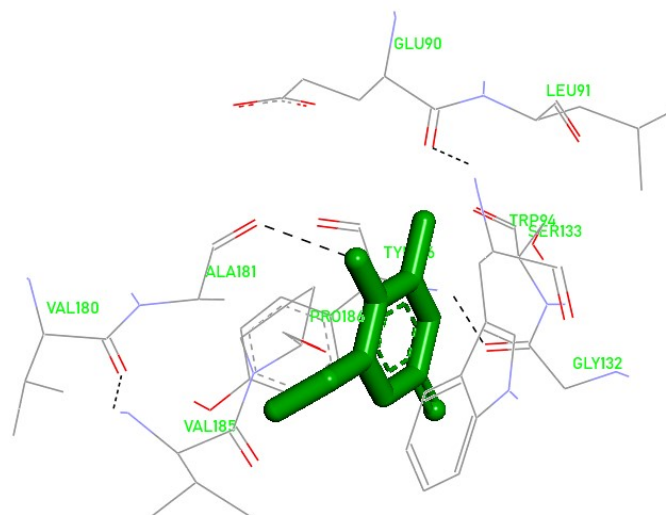

T2R1\_61:

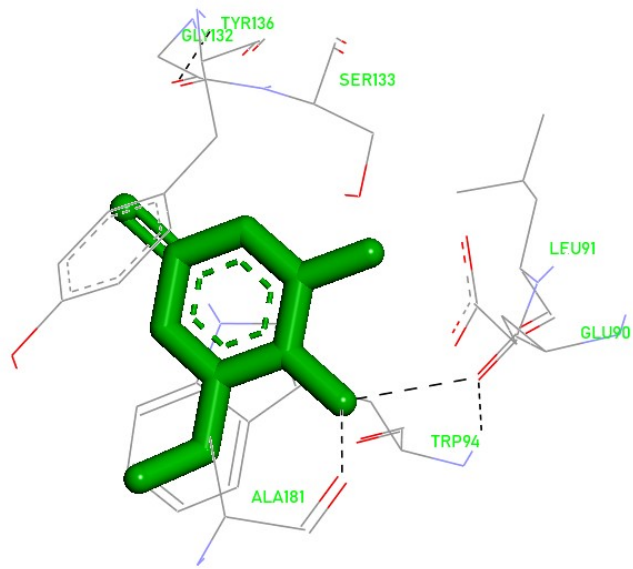

T2R1\_62:

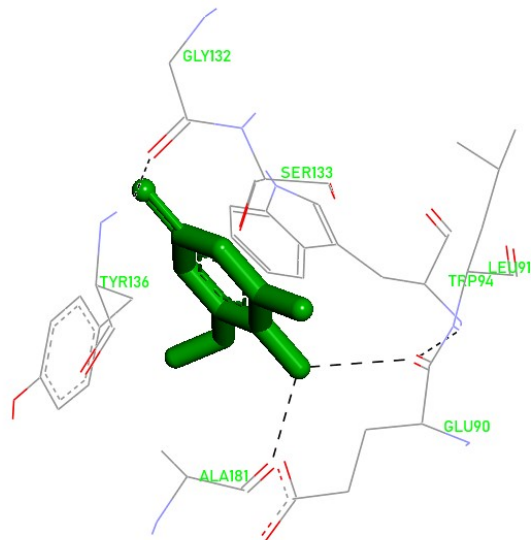

T2R1\_63:

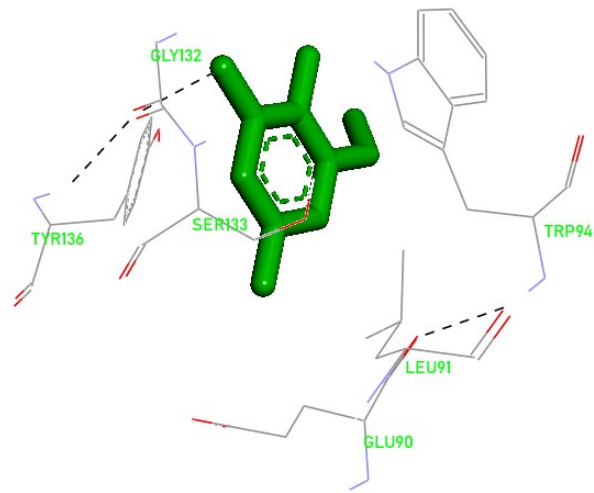

T2R1\_64:

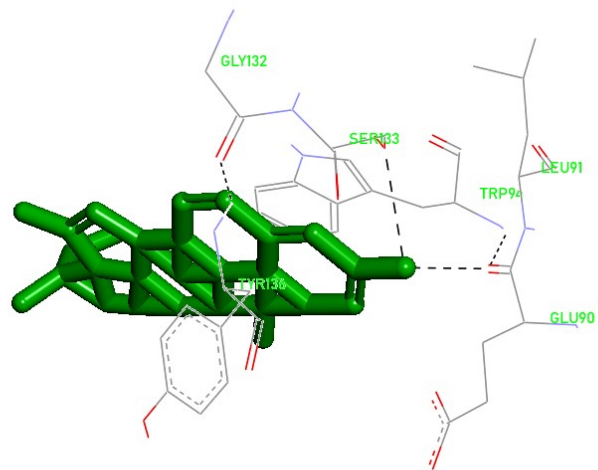



T2R1\_65:

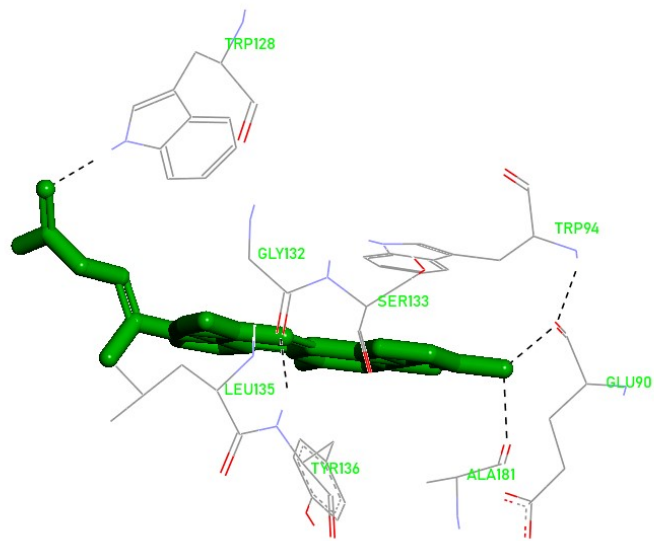

T2R1\_66:

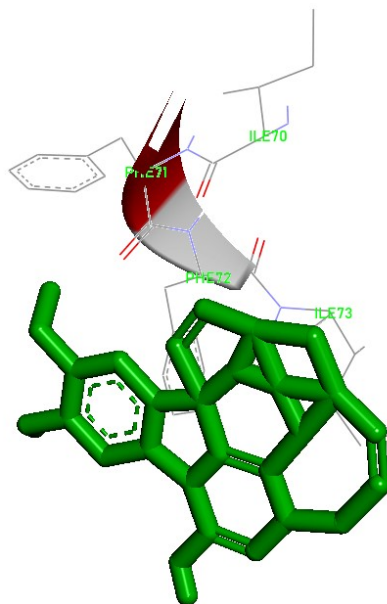

T2R1\_67:

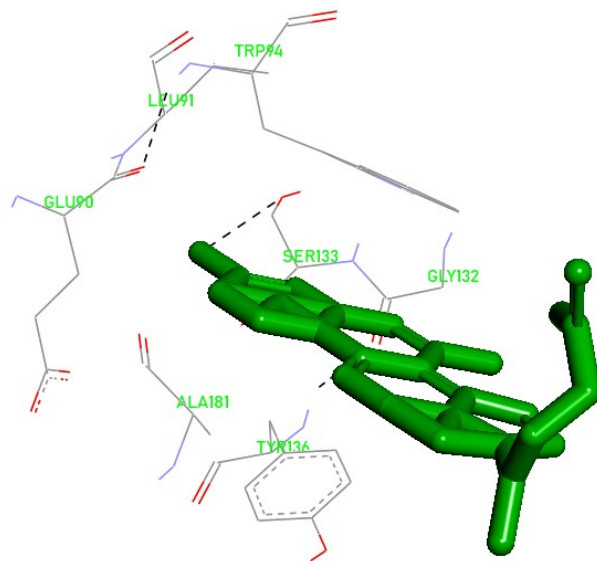

T2R1\_68:

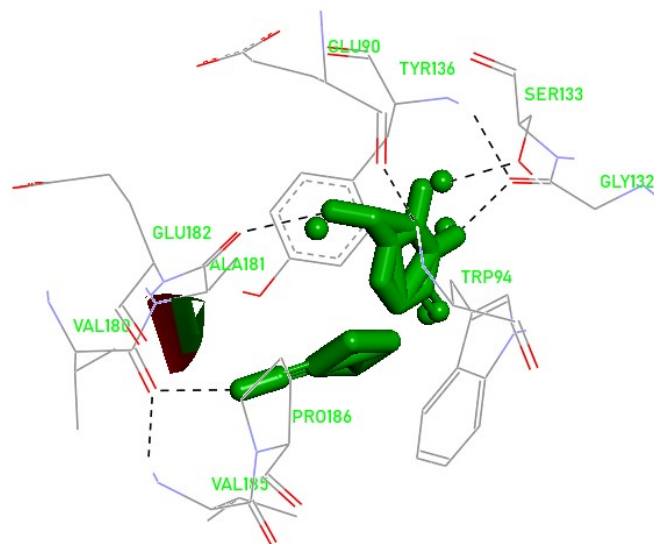

T2R1\_69:

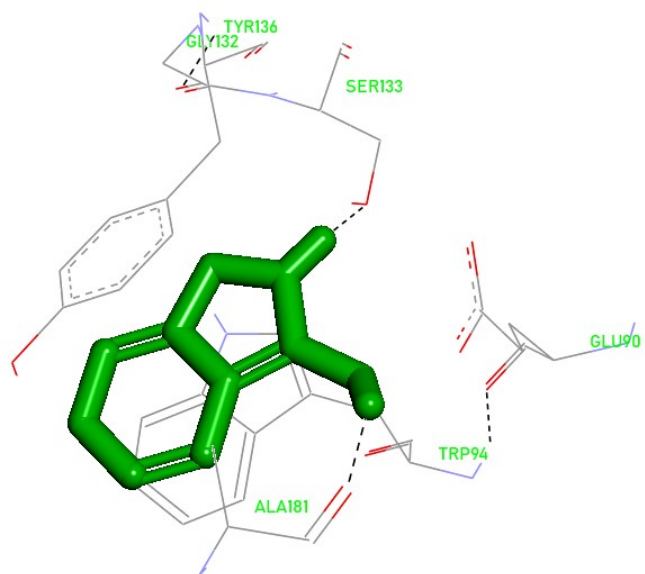

T2R1\_70:

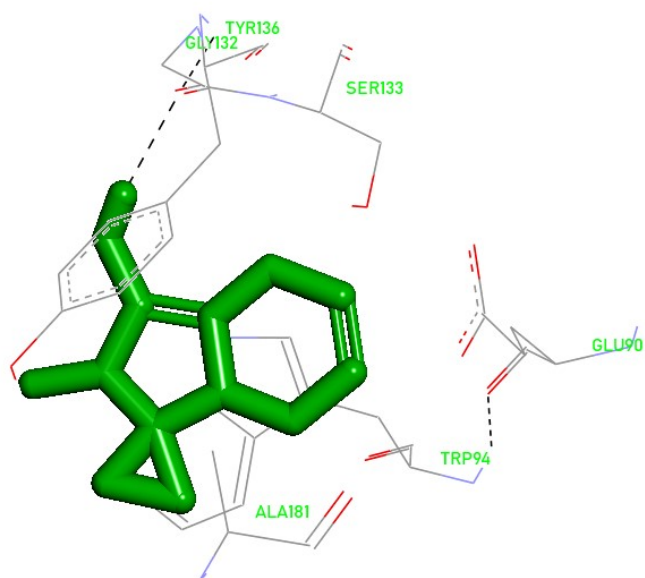

T2R1\_71:

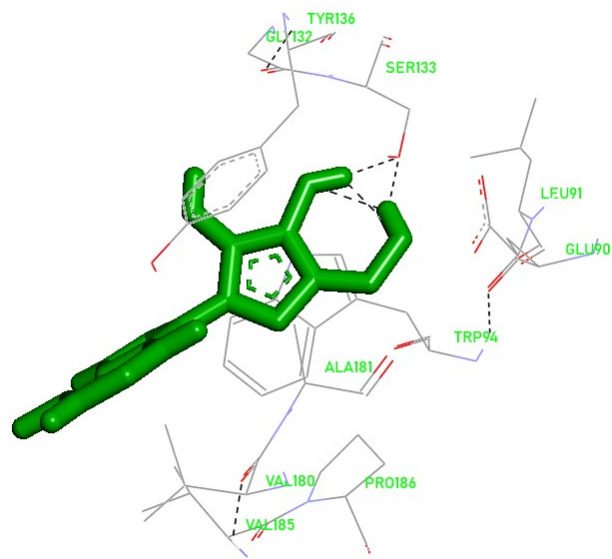

T2R1\_72:

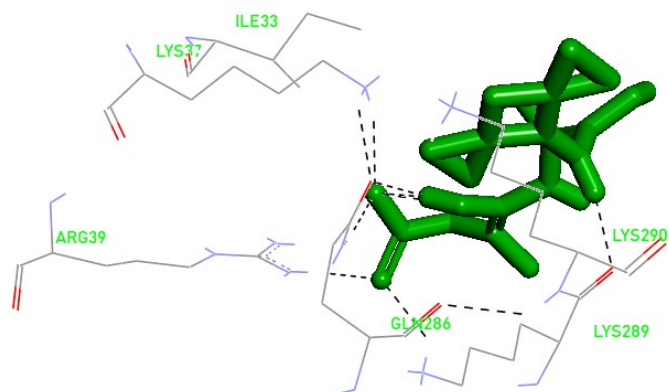

T2R1\_73:

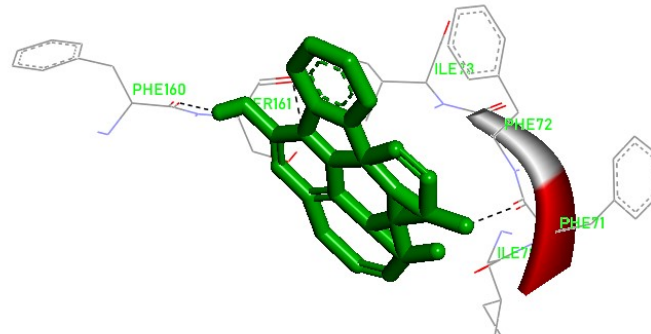

T2R1\_74:

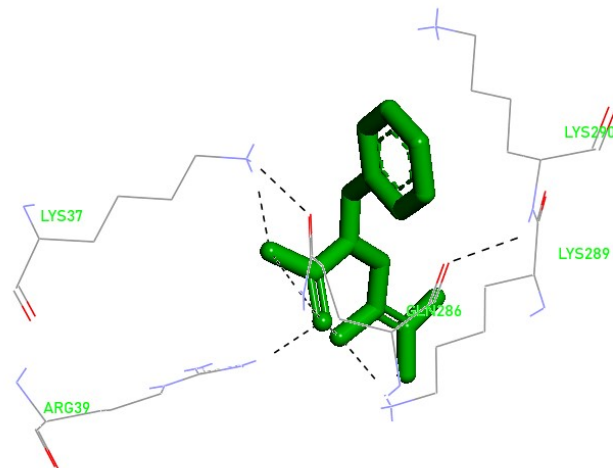

T2R1\_75:

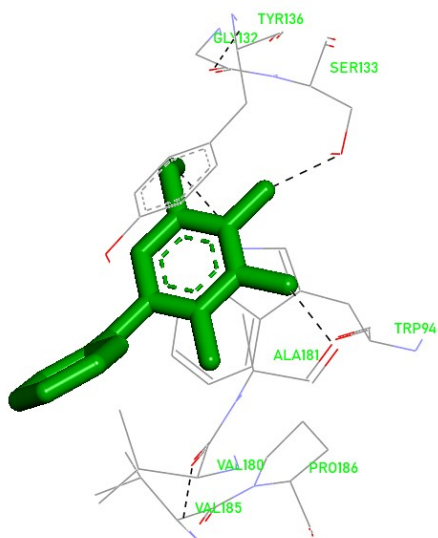

T2R1\_76:

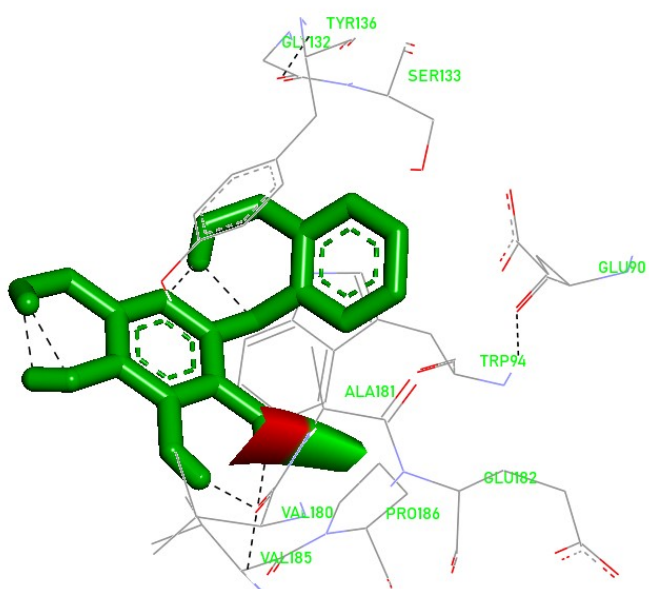

T2R1\_77:

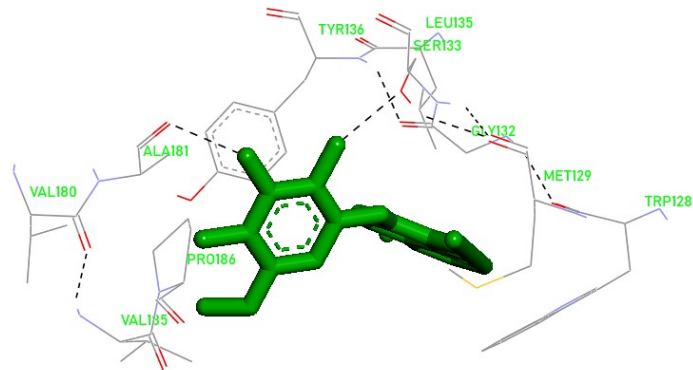

T2R1\_78:

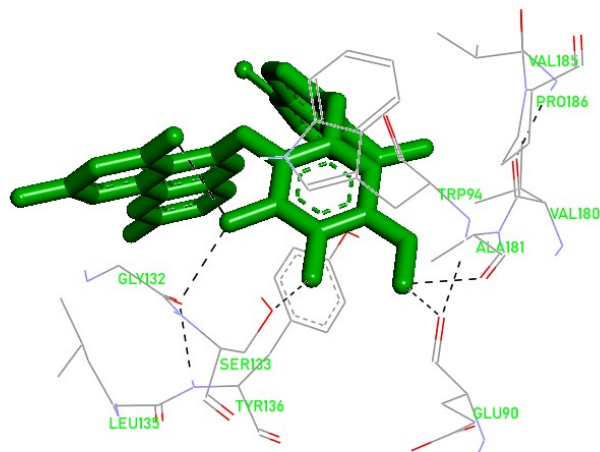

T2R1\_79:

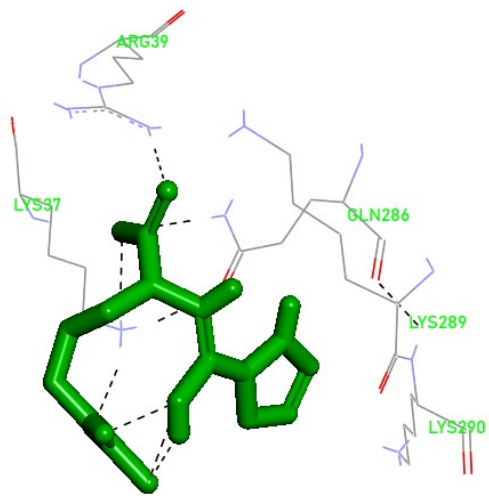

T2R1\_80:

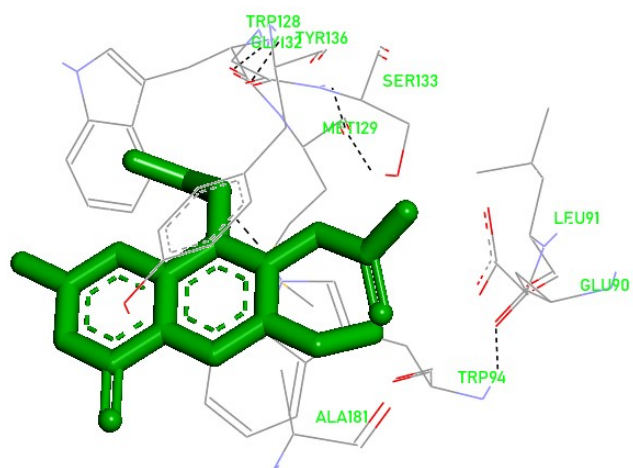



T2R1\_81:

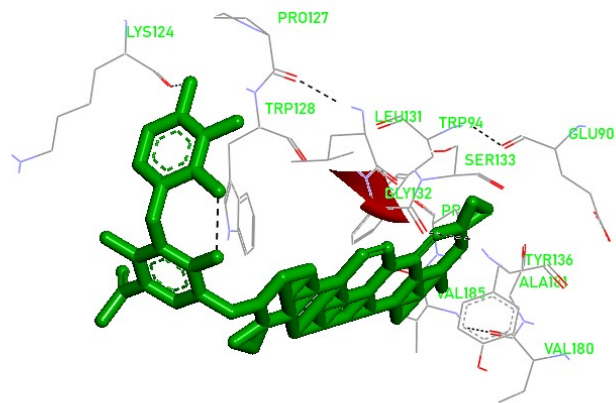

T2R1\_82:

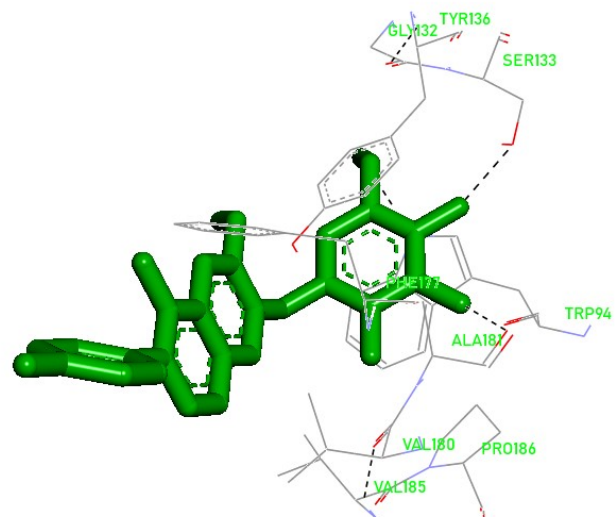

T2R1\_83:

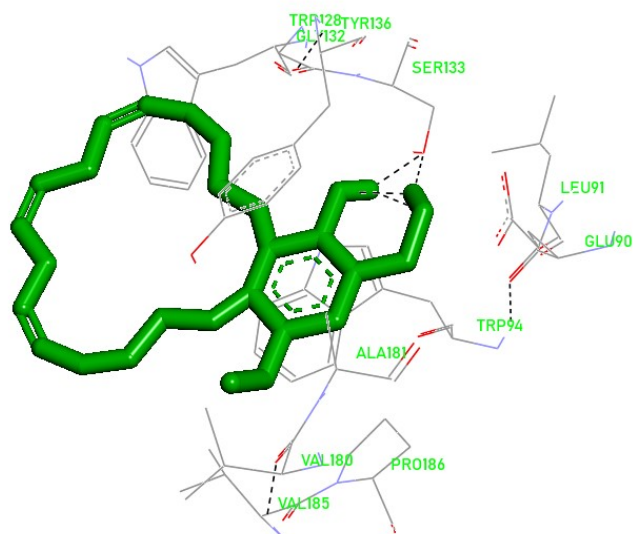

T2R1\_84:

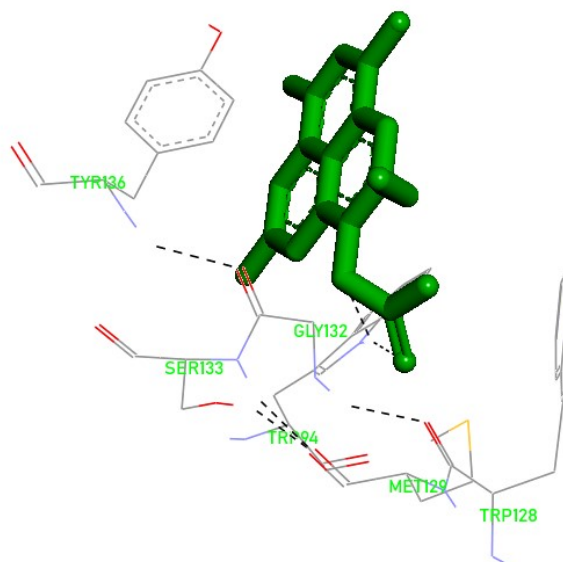

T2R1\_85:

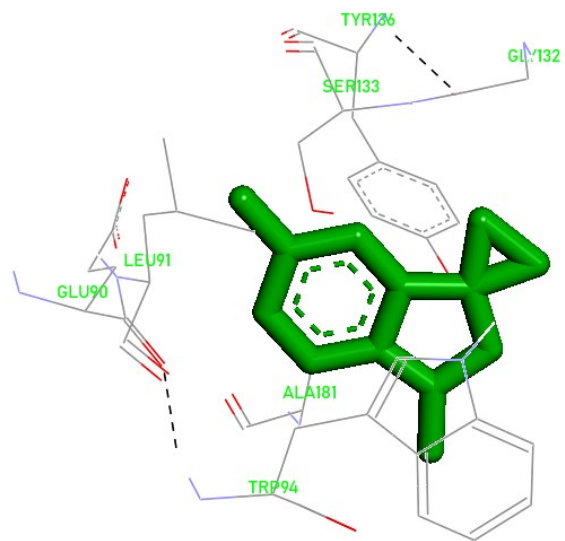

T2R1\_86:

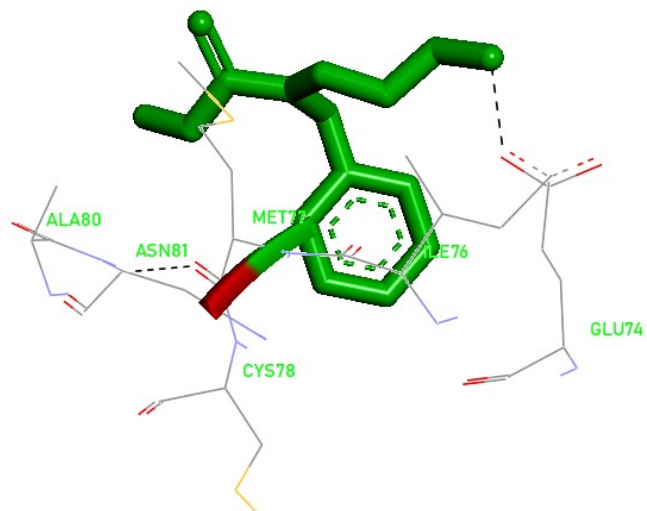

T2R1\_87:

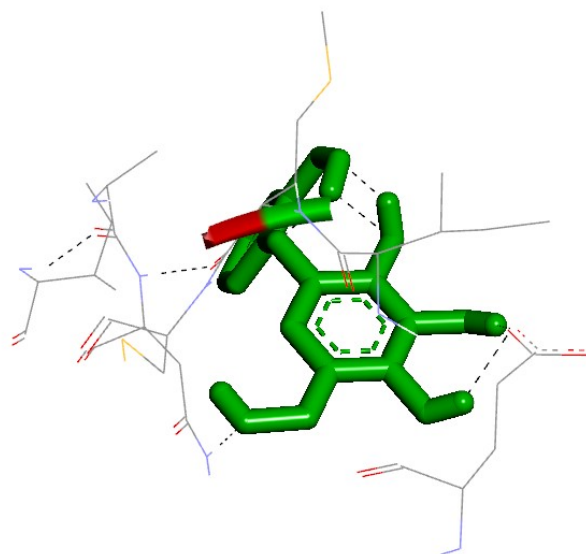

T2R1\_88:

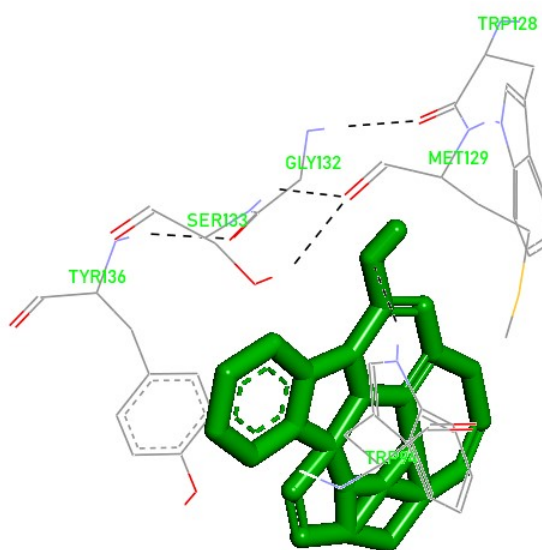

T2R1\_89:

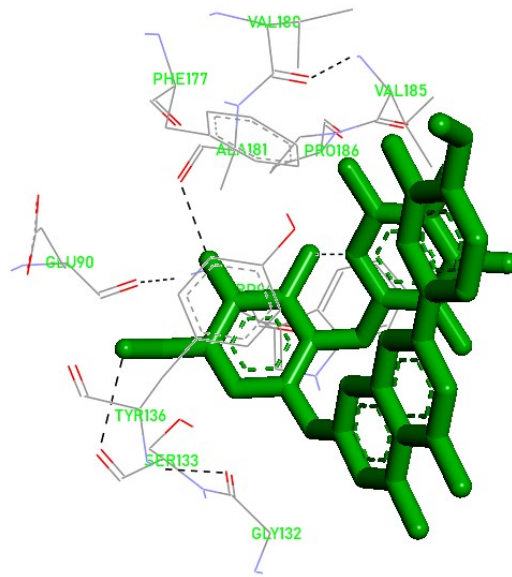

T2R1\_90:

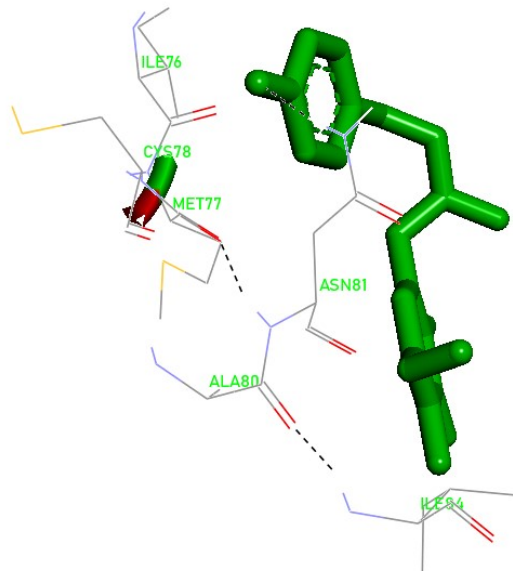

T2R1\_91:

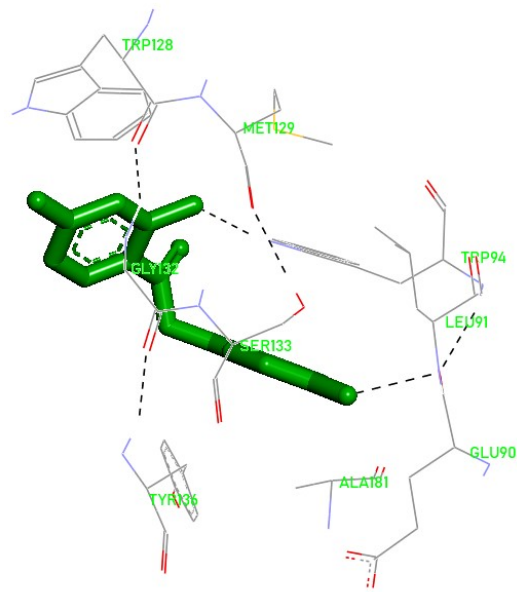

T2R1\_92:

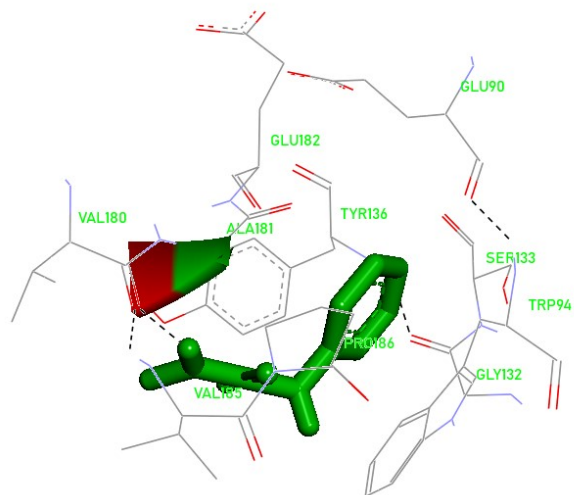

T2R1\_93:

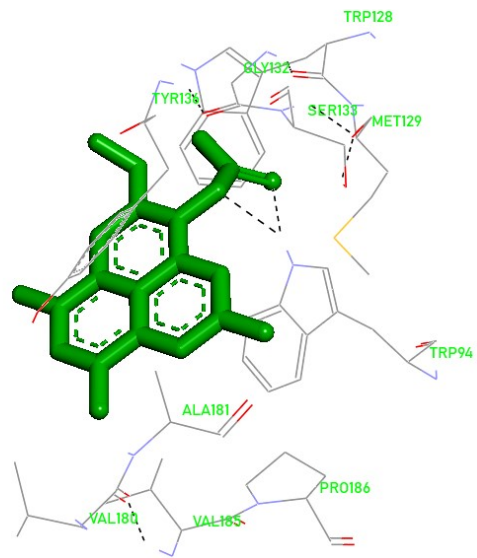

T2R1\_94:

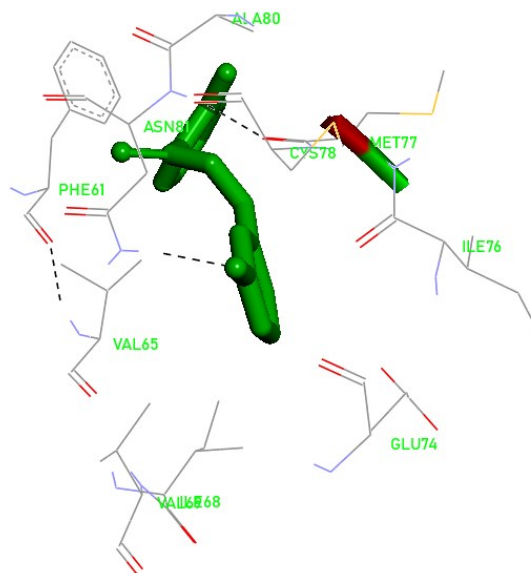

T2R1\_95:

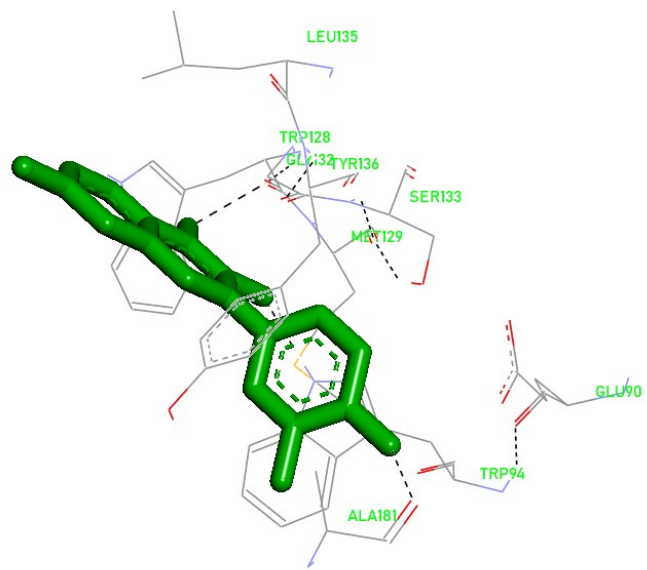

T2R1\_96:

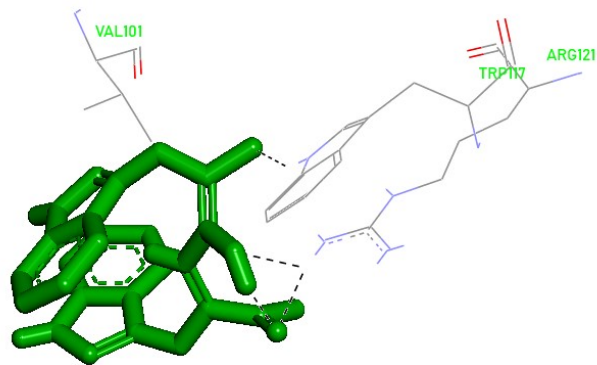



T2R1\_97:

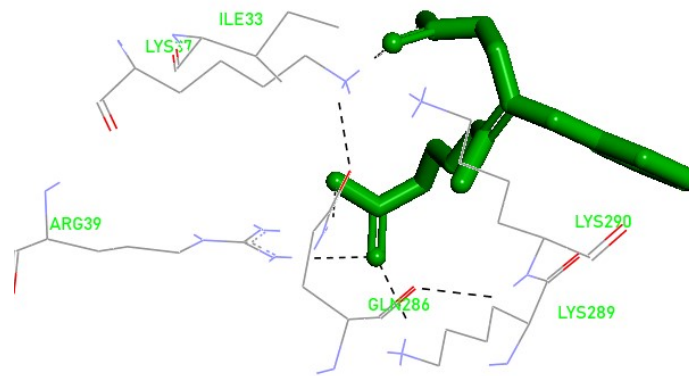

T2R1\_98:

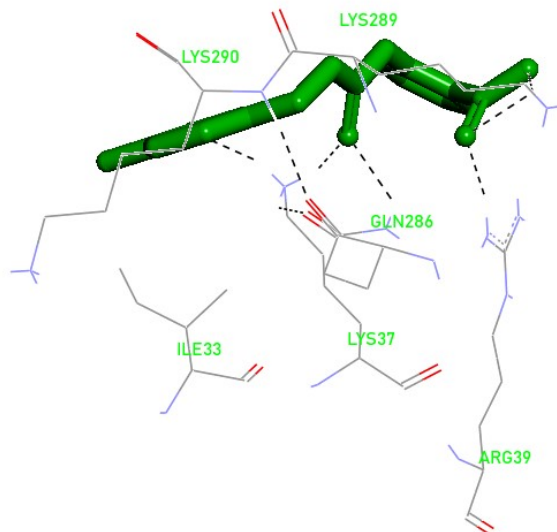

T2R1\_99:

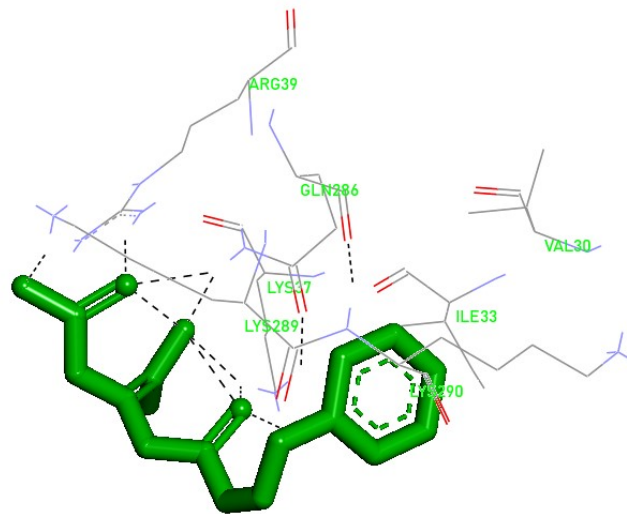

T2R1\_100:

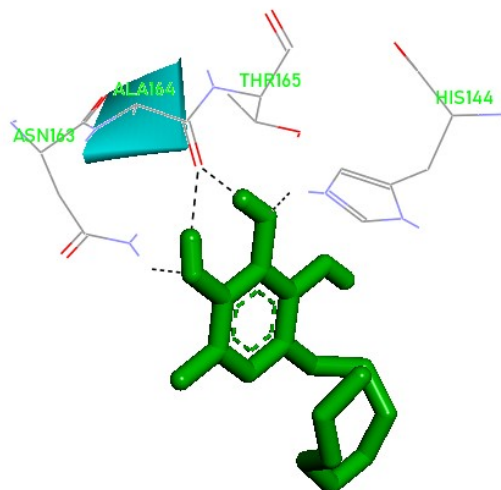

T2R1\_101:

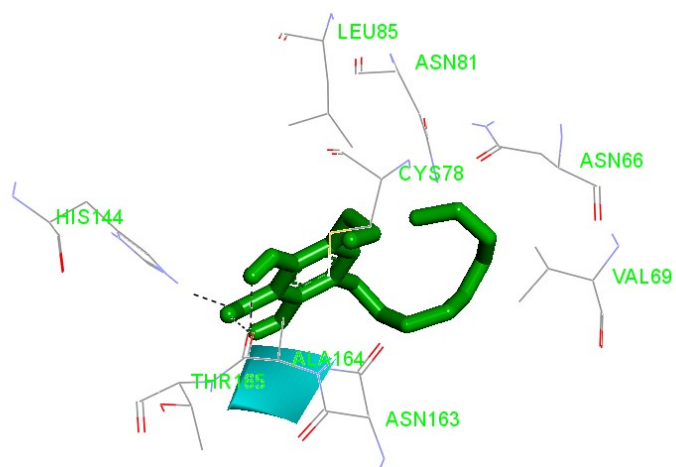

T2R1\_102:

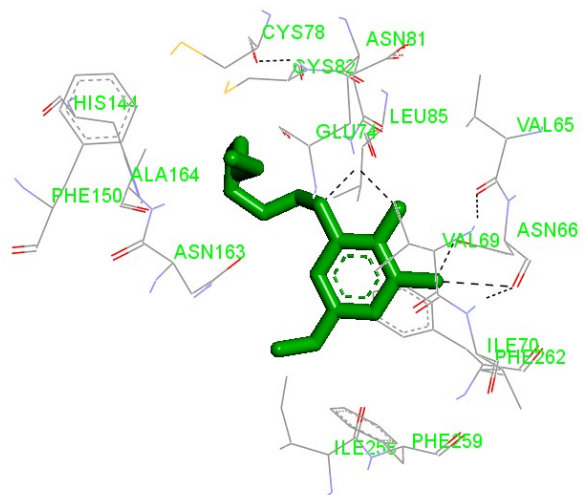

T2R1\_103:

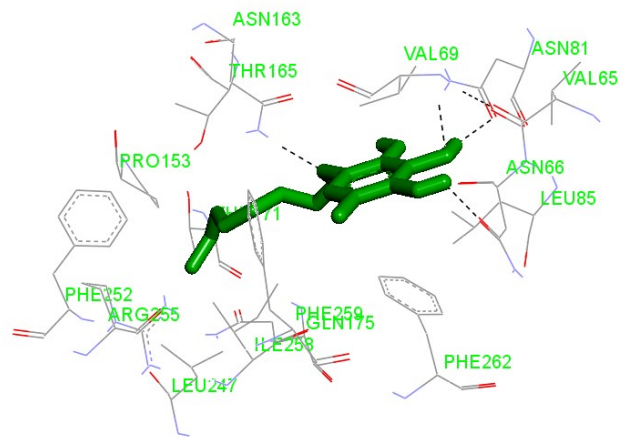

T2R1\_104:

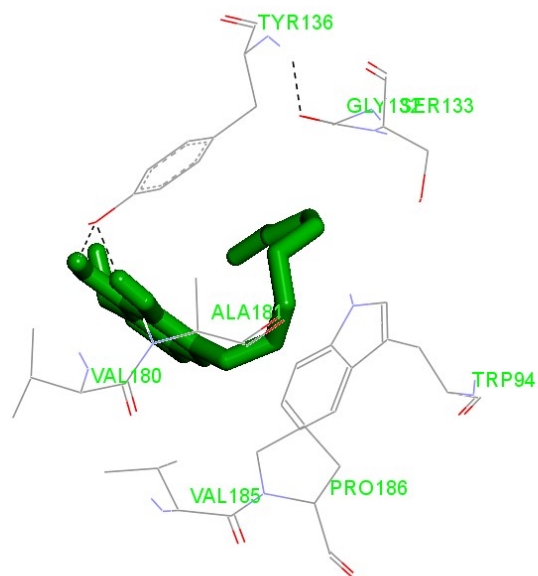

T2R1\_105:

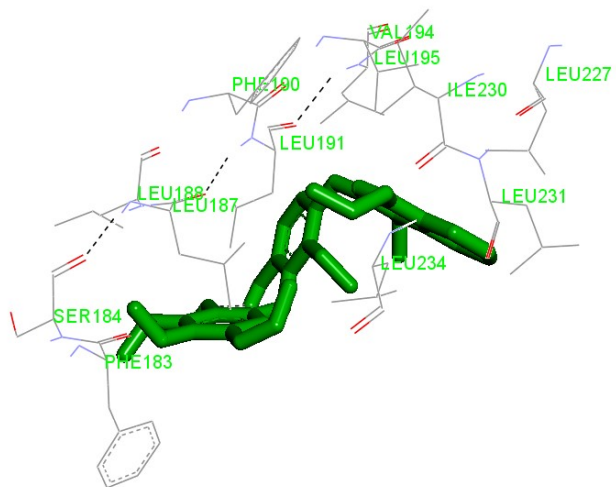

T2R1\_106:

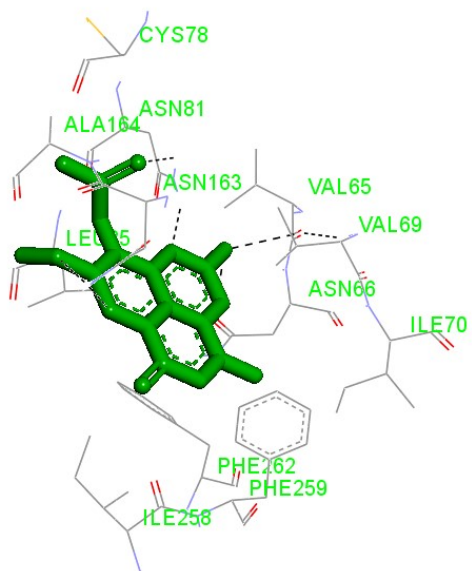

T2R1\_107:

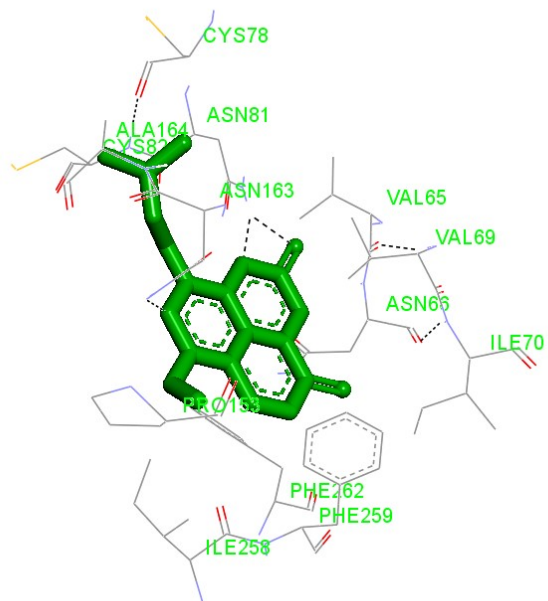

T2R1\_108:

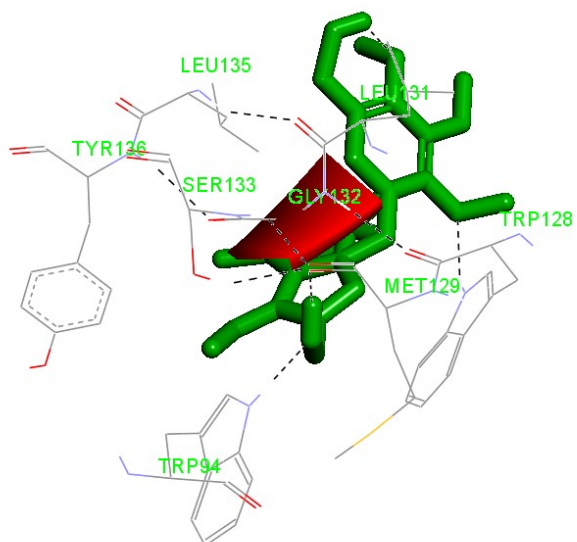

T2R1\_109:

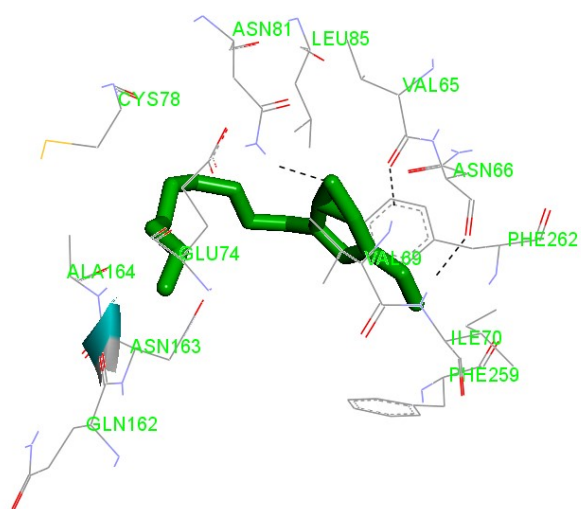

T2R1\_110:

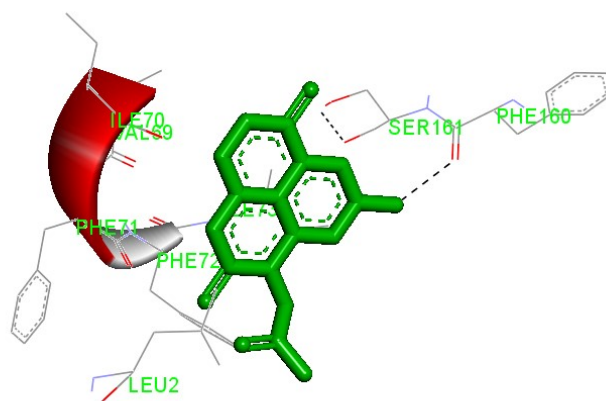

T2R1\_111:

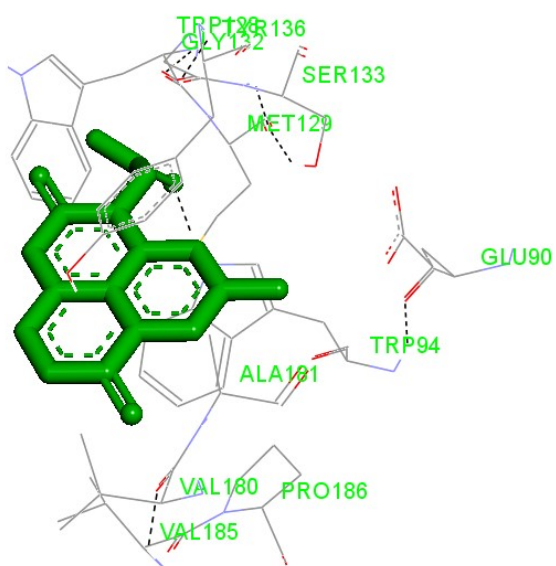

T2R1\_112:

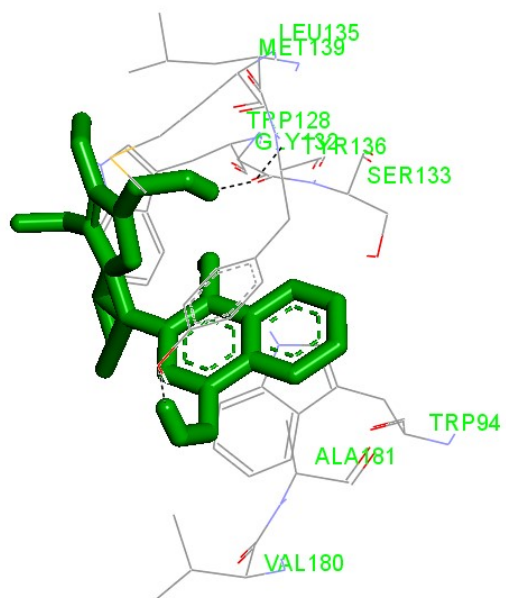



T2R1\_113:

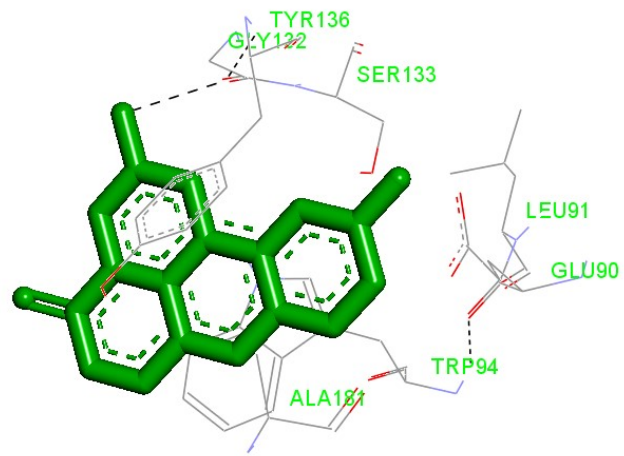

T2R1\_114:

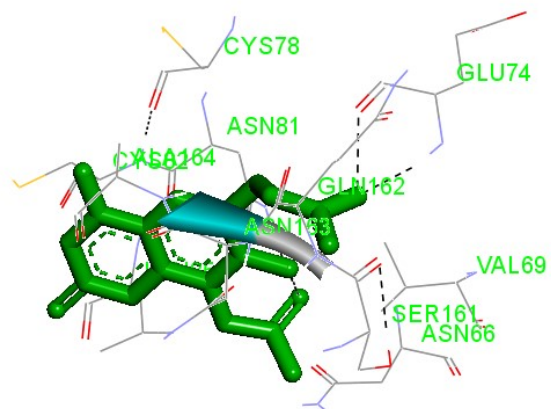

T2R1\_115:

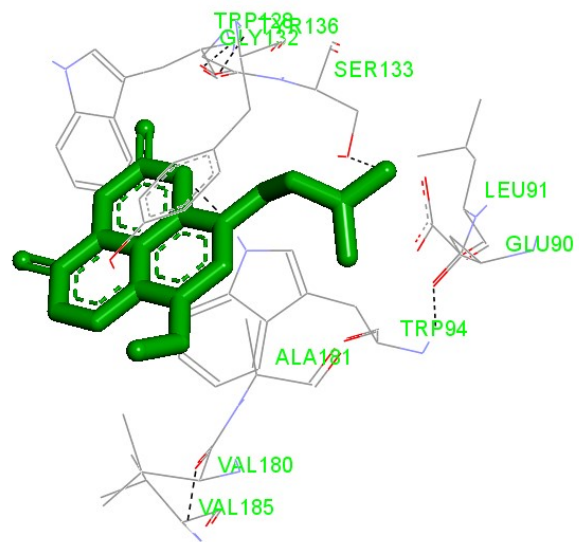

T2R1\_116:

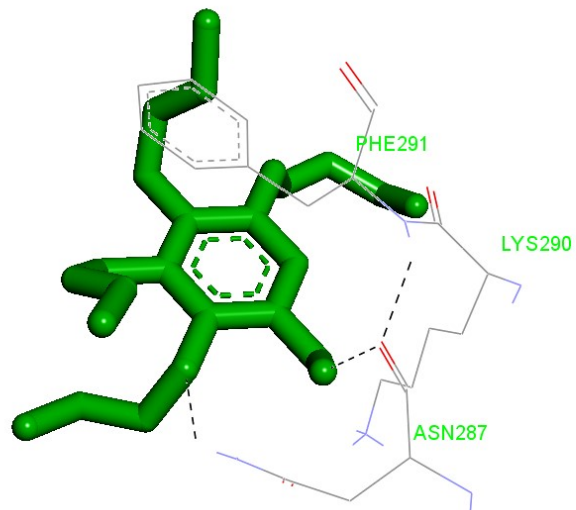

T2R1\_117:

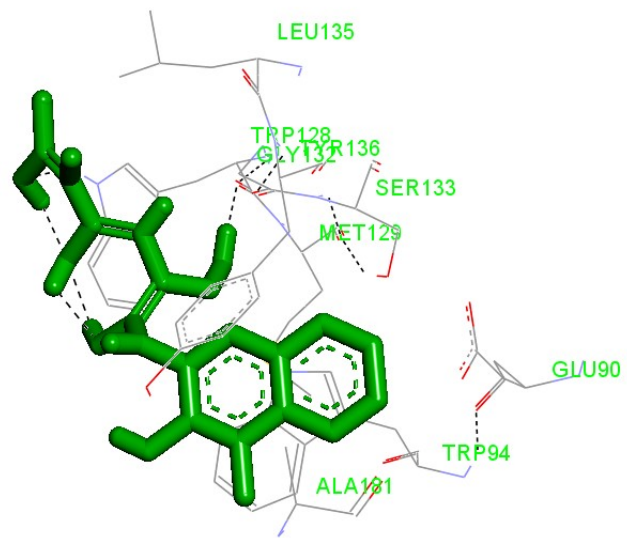

T2R1\_118:

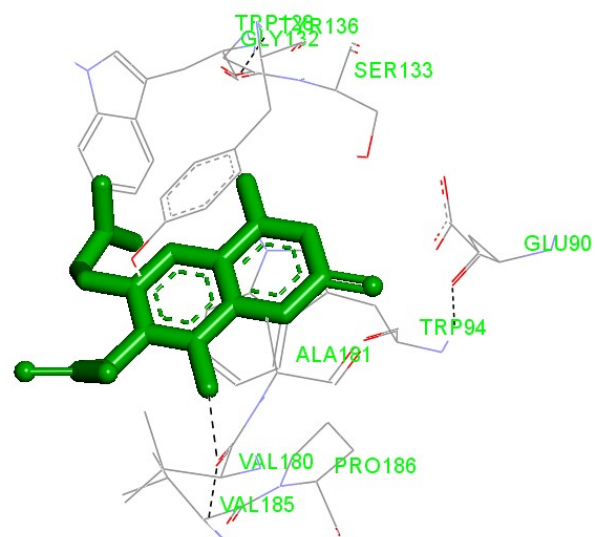

T2R1\_119:

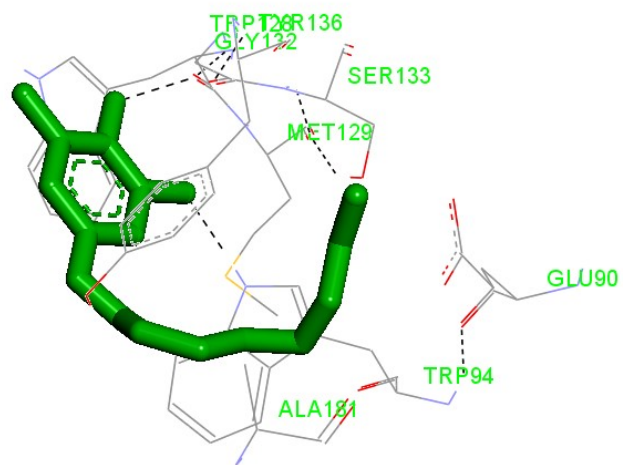

T2R1\_120:

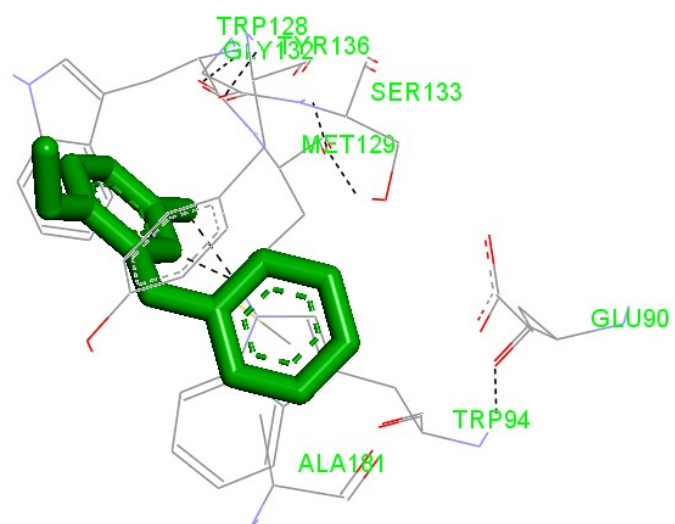

T2R1\_121:

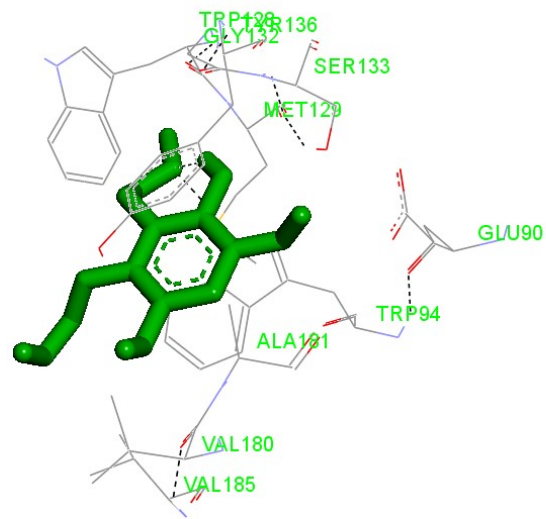

T2R1\_122:

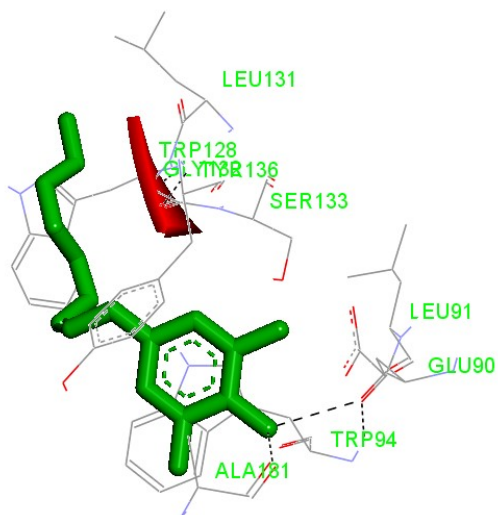

T2R1\_123:

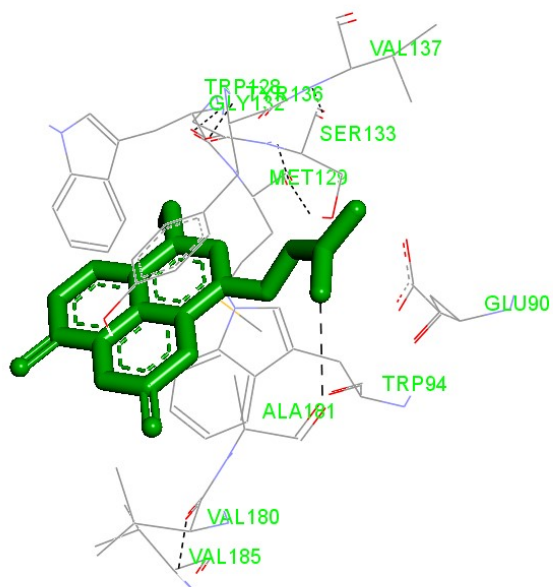

T2R1\_124:

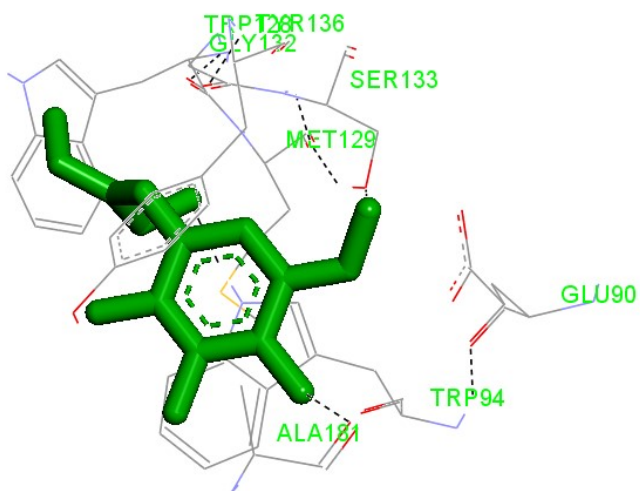

T2R1\_125:

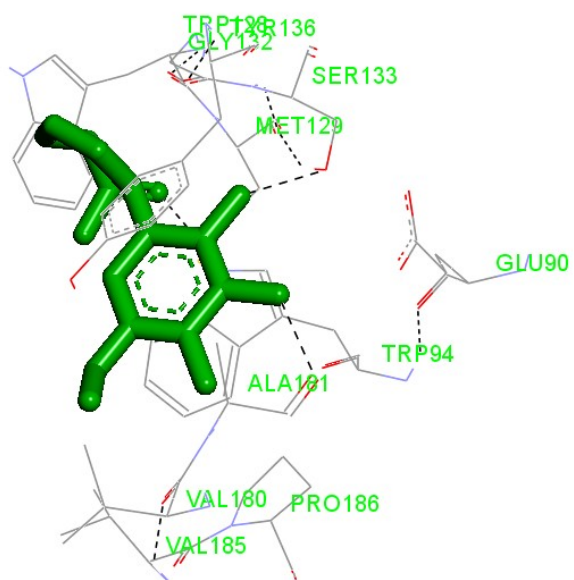

T2R1\_126:

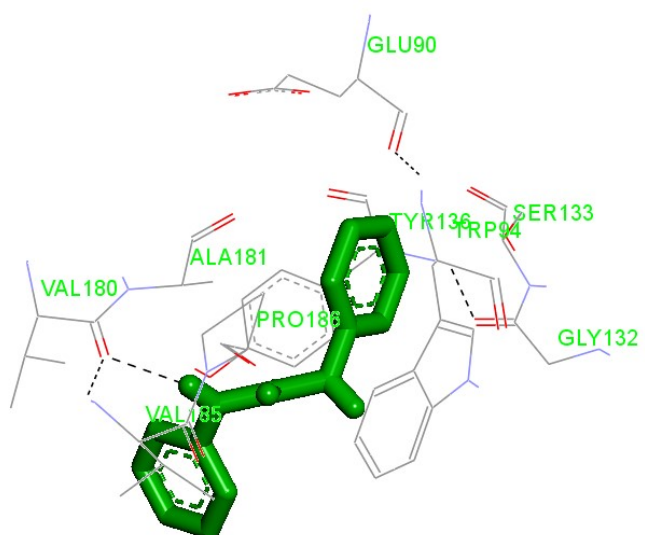

T2R1\_127:

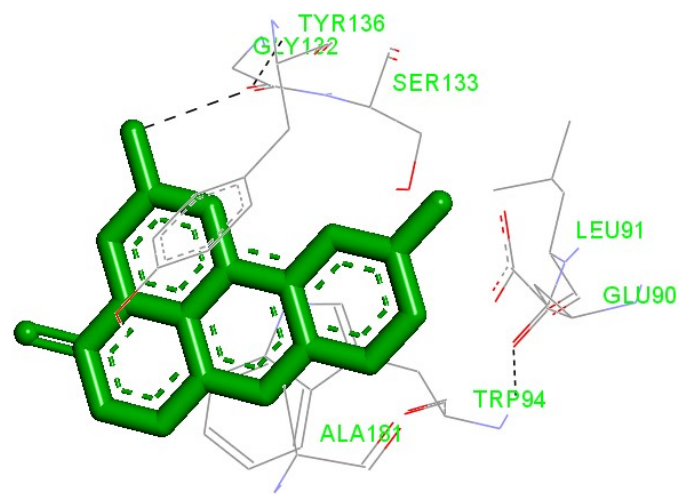

T2R1\_128:

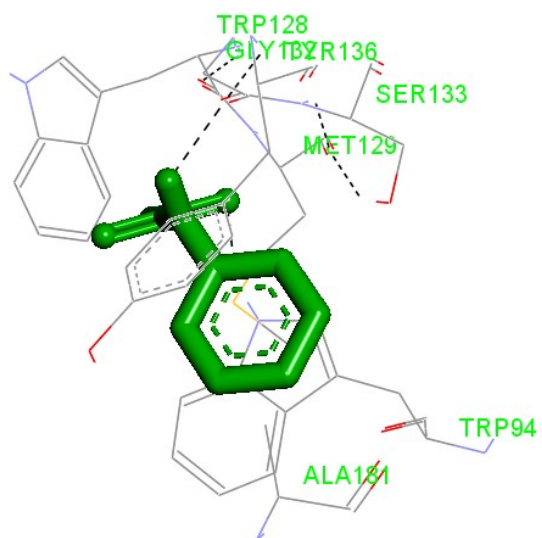



T2R1\_129:

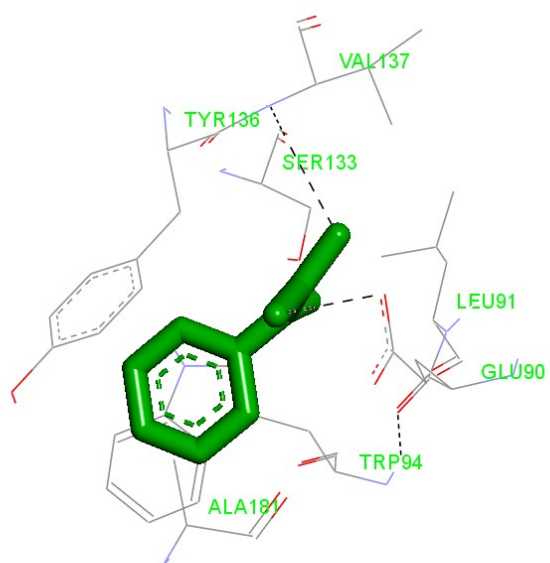

T2R1\_130:

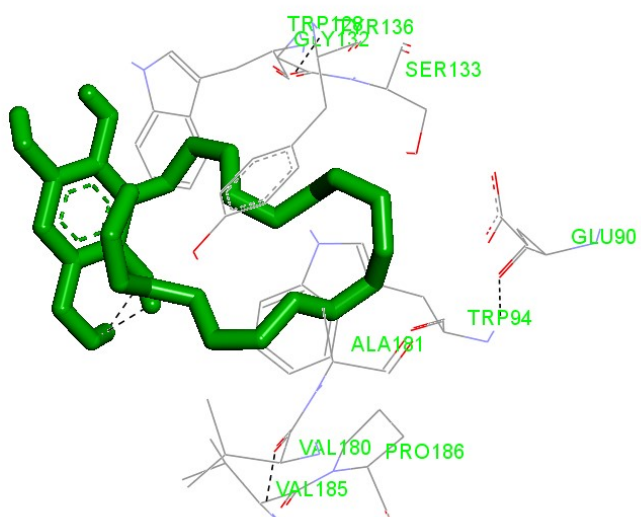

T2R1\_131:

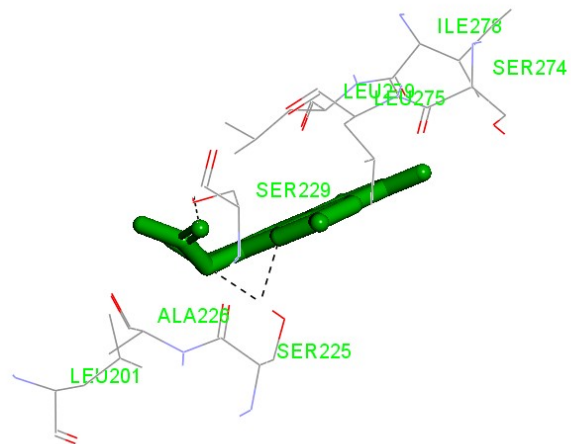

T2R1\_132:

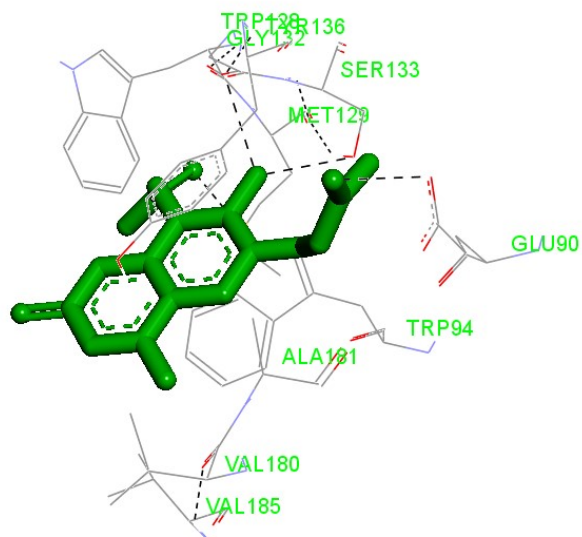

T2R1\_133:

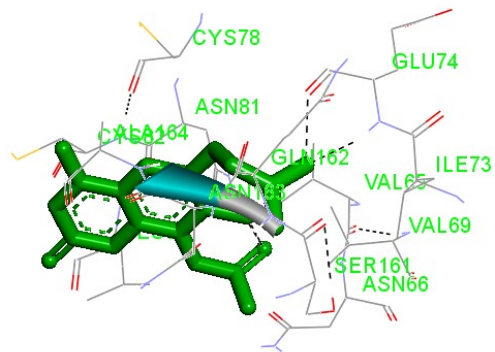

T2R1\_134:

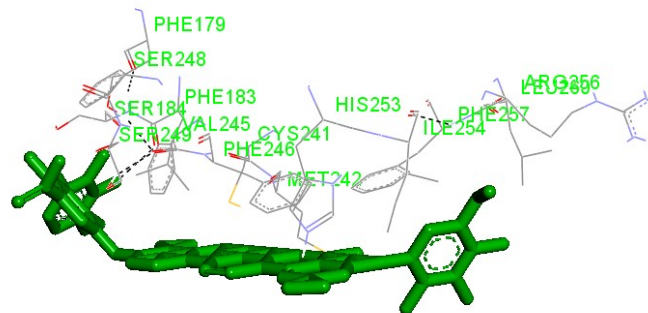

T2R1\_135:

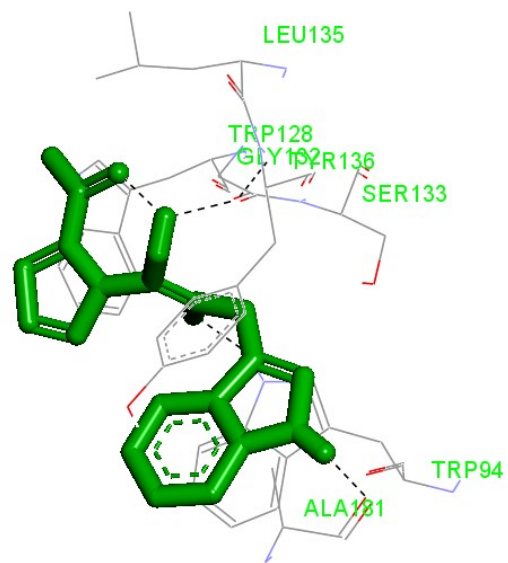

T2R1\_136:

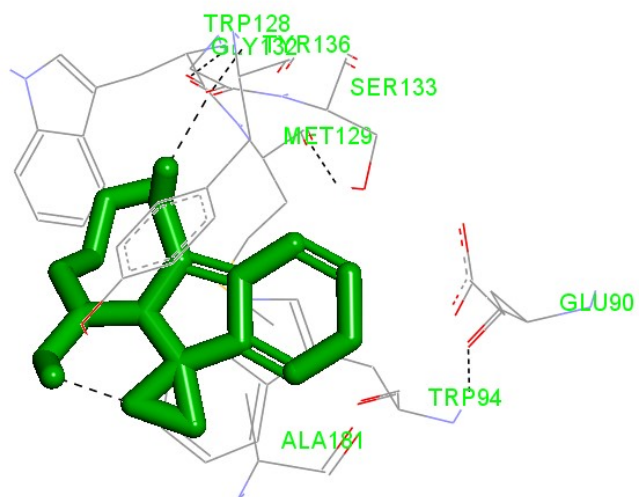

T2R1\_137:

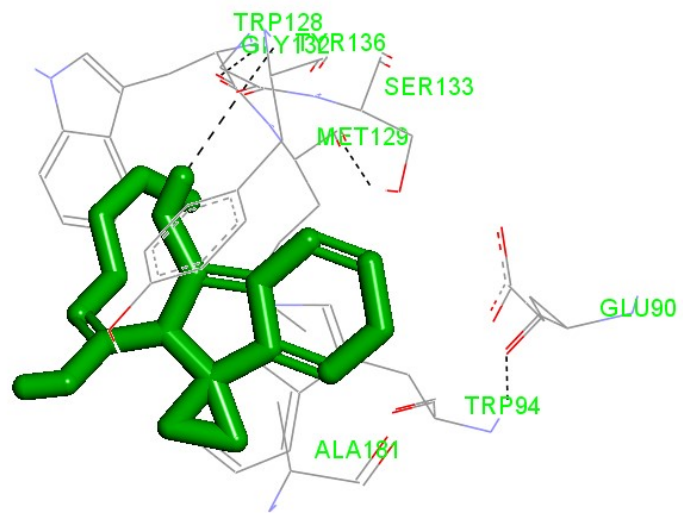

T2R1\_138:

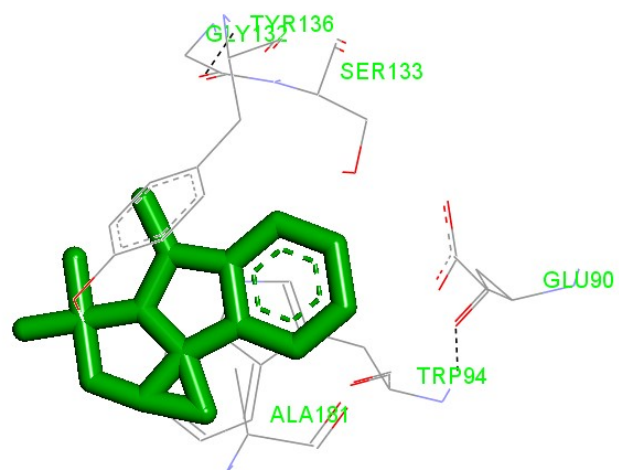

T2R1\_139:

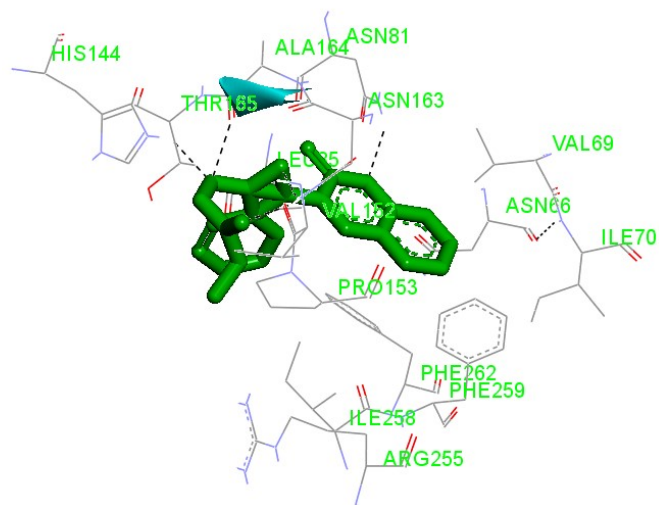

T2R1\_140:

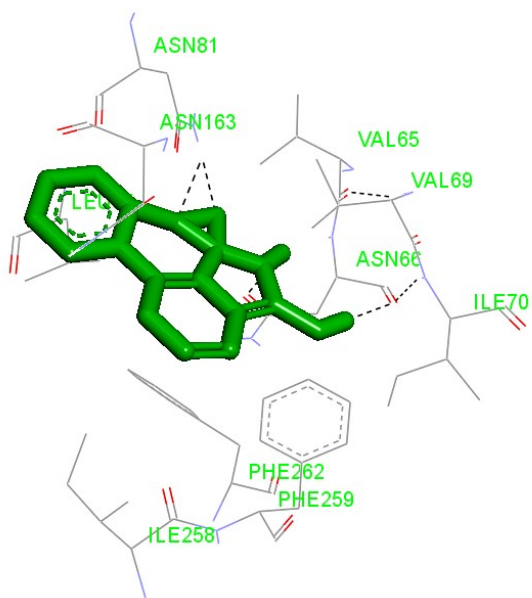

T2R1\_141:

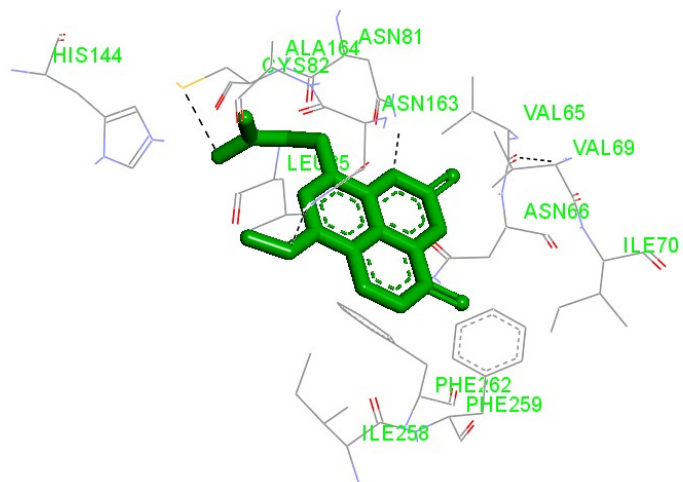

T2R1\_142:

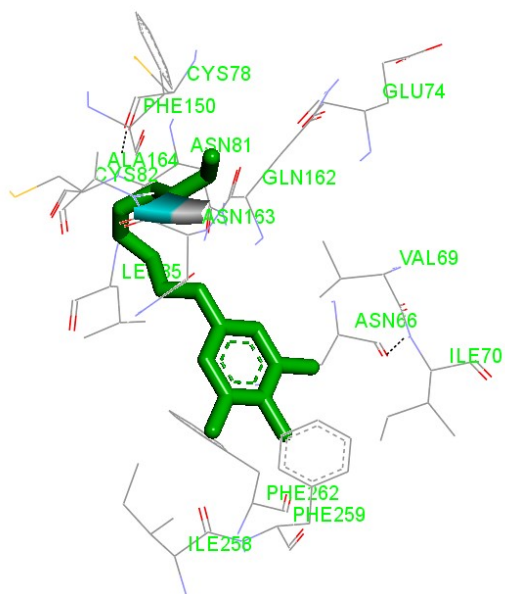

T2R1\_143:

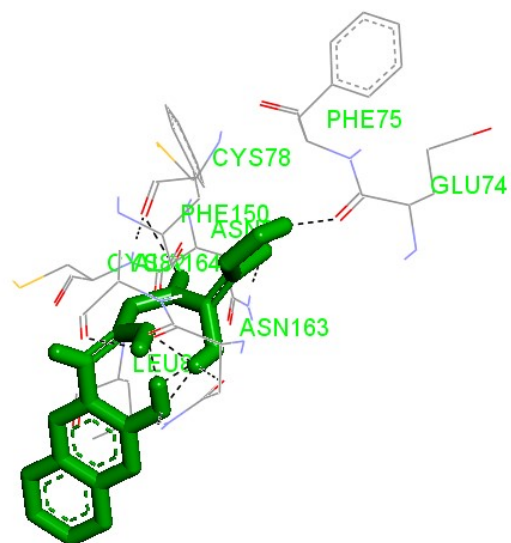

T2R1\_144:

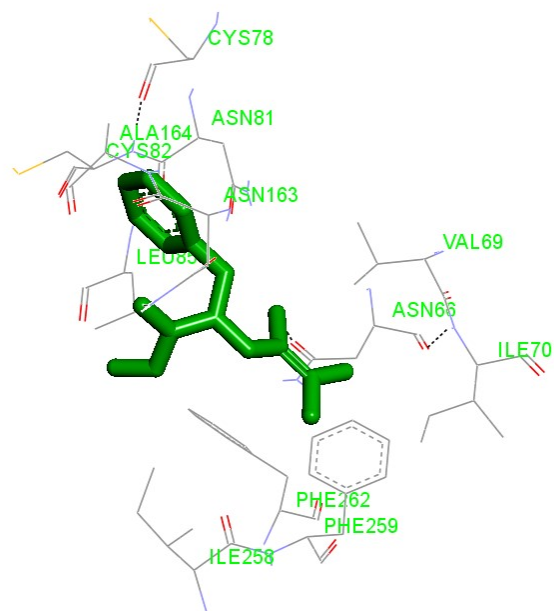



T2R1\_145:

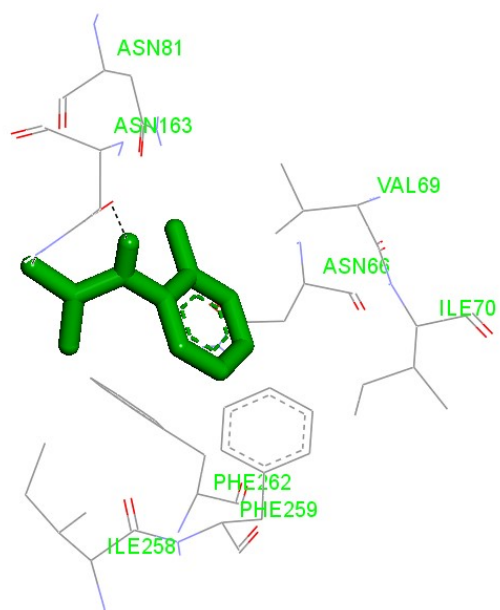

T2R1\_146:

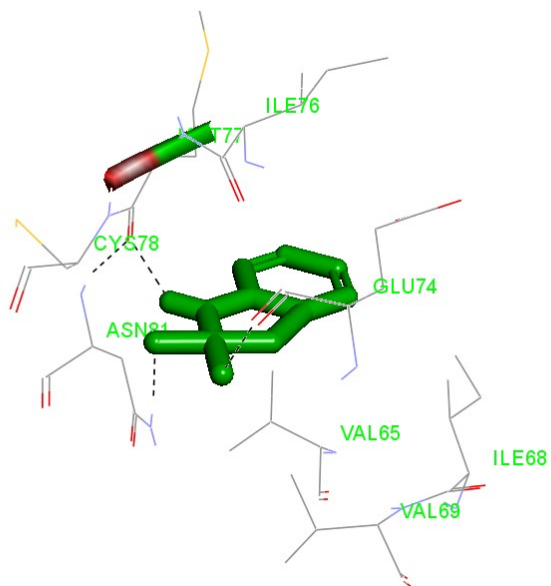

T2R1\_147:

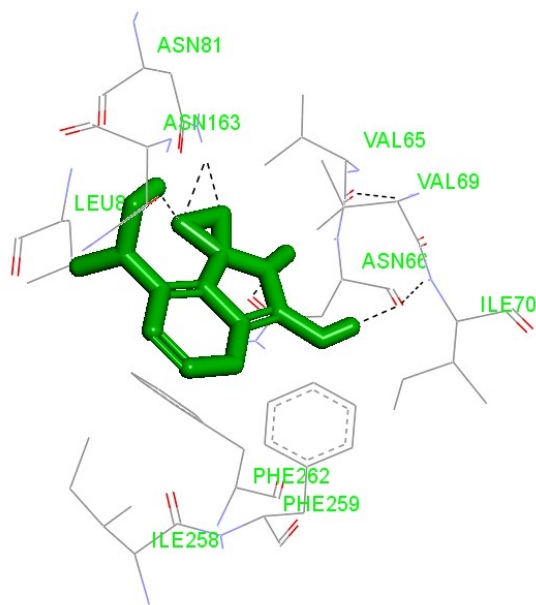

T2R1\_148:

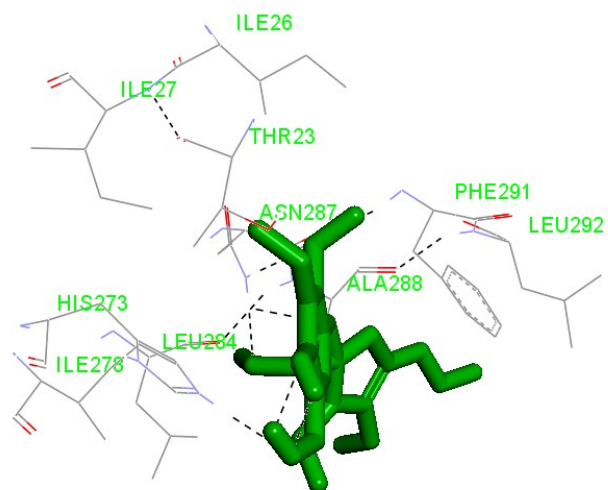

T2R1\_149:

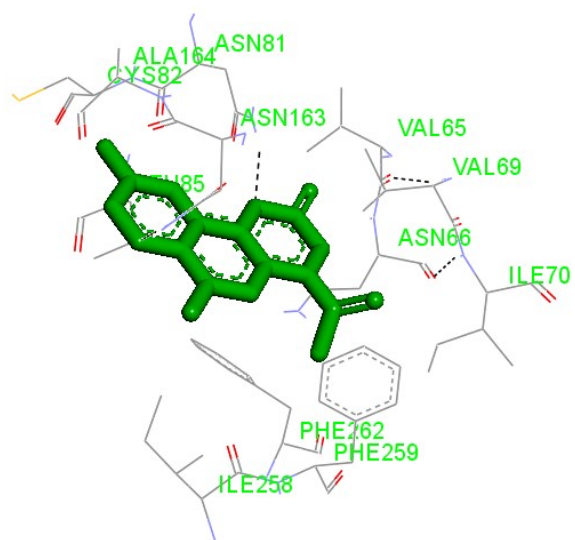

T2R1\_150:

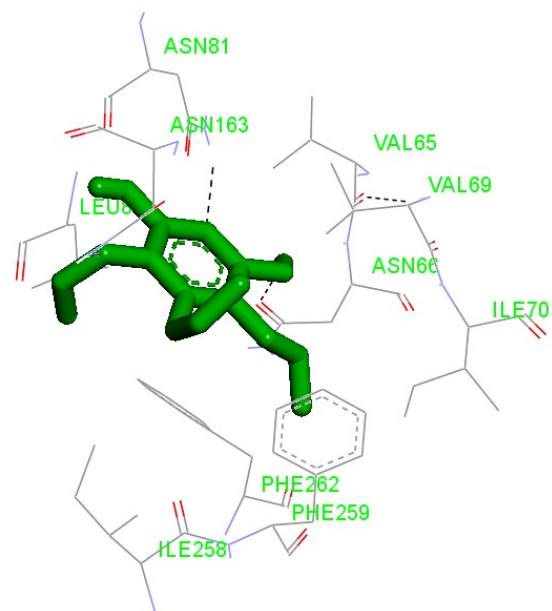

T2R1\_151:

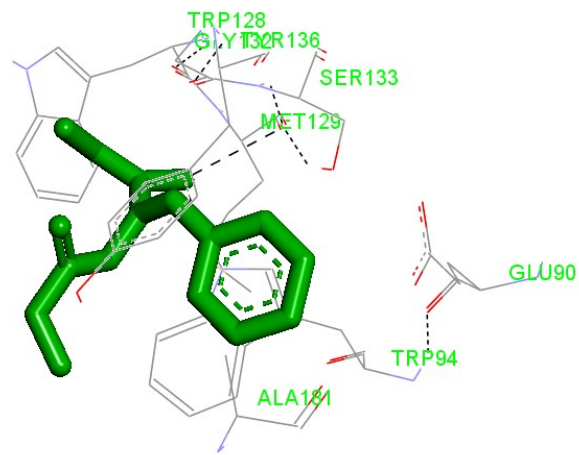

T2R1\_152:

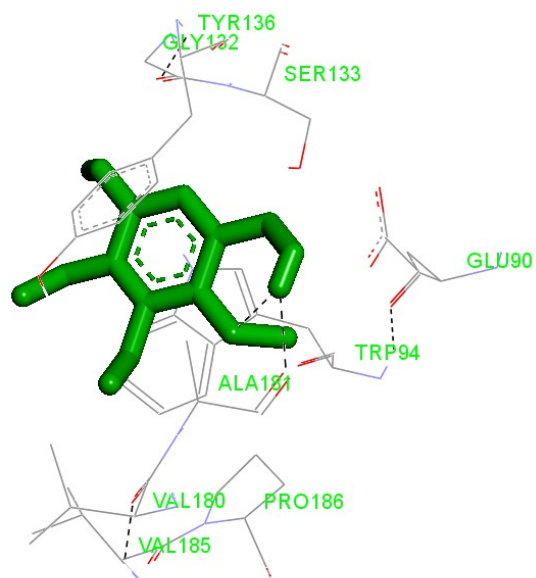

T2R1\_153:

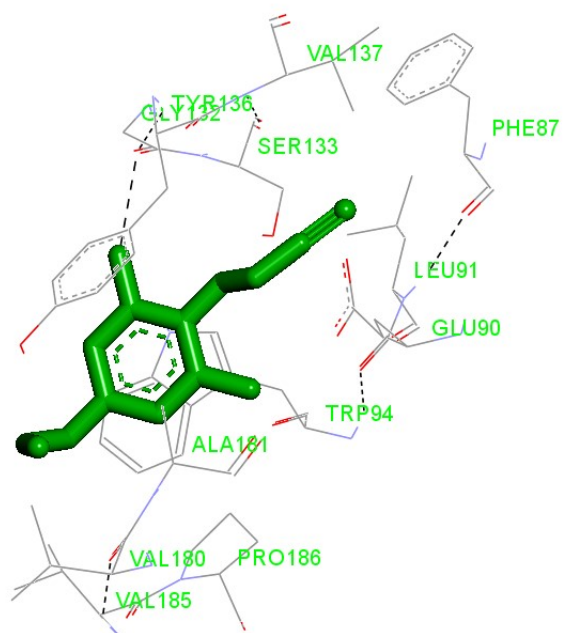

T2R1\_154:

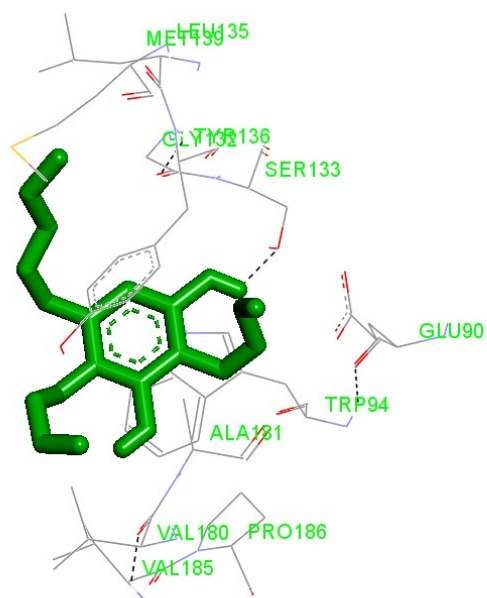

T2R1\_155:

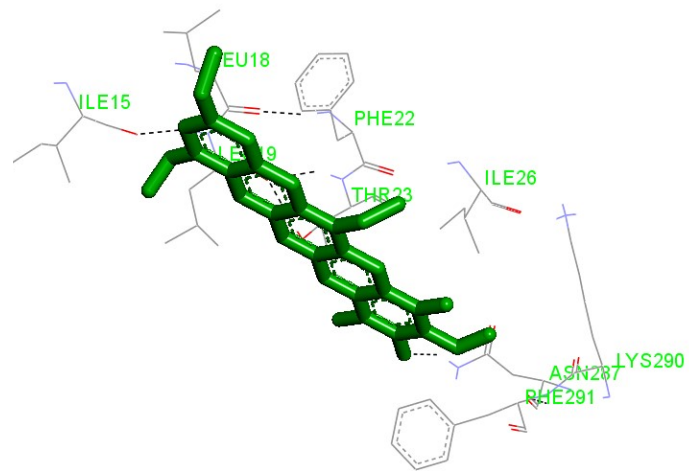

T2R1\_156:

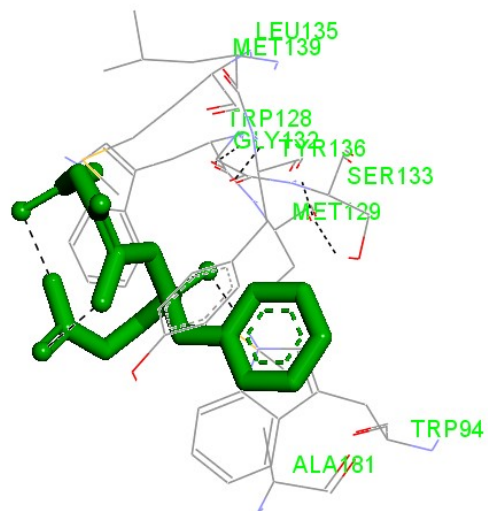

T2R1\_157:

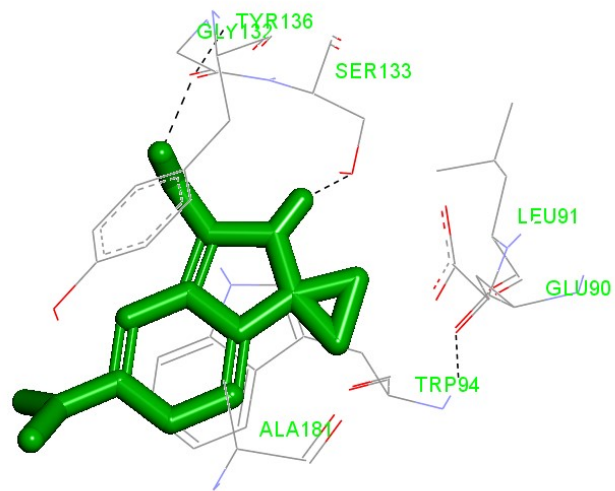

T2R1\_158:

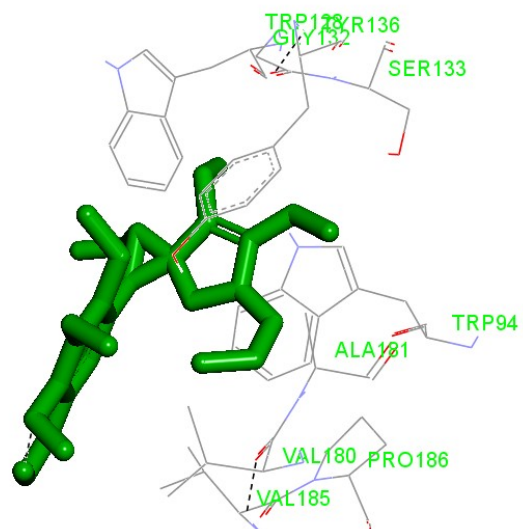

T2R1\_159:

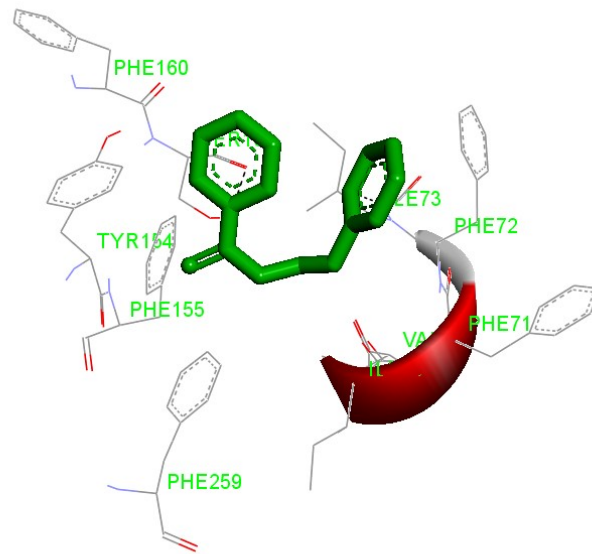

T2R1\_160:

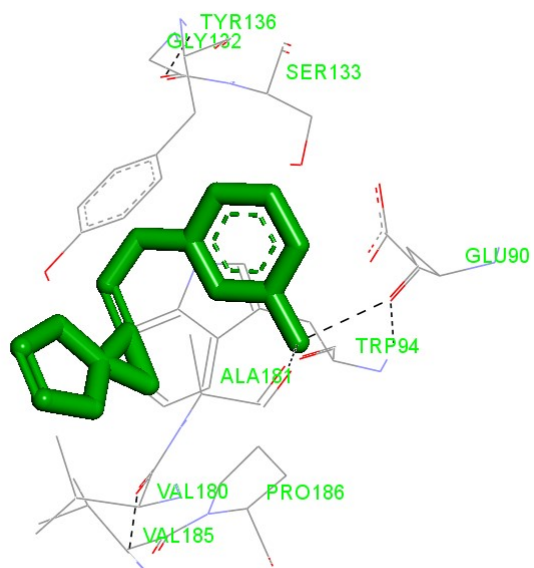



T2R1\_161:

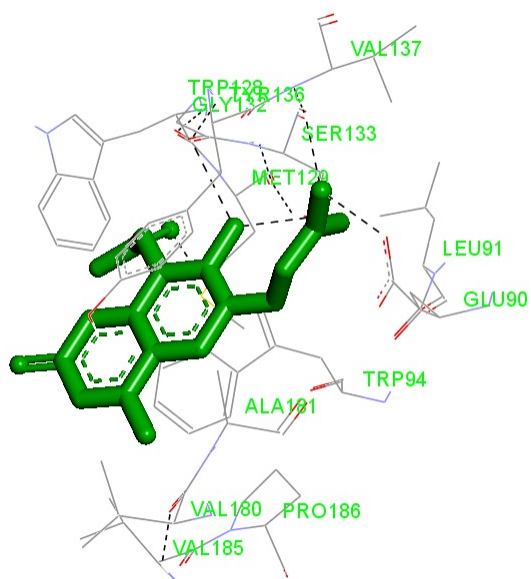

T2R1\_162:

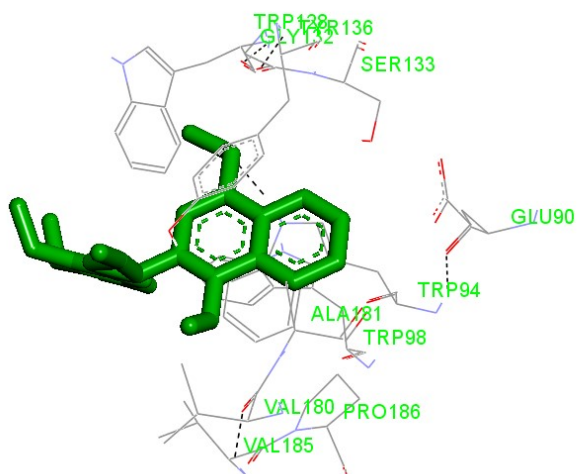

T2R1\_163:

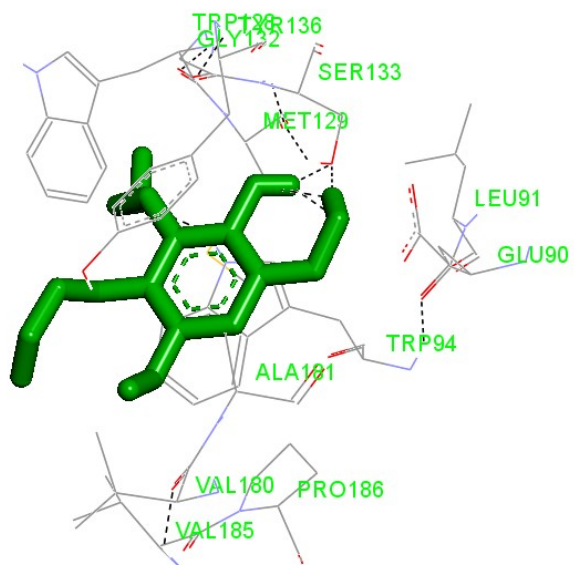

T2R1\_164:

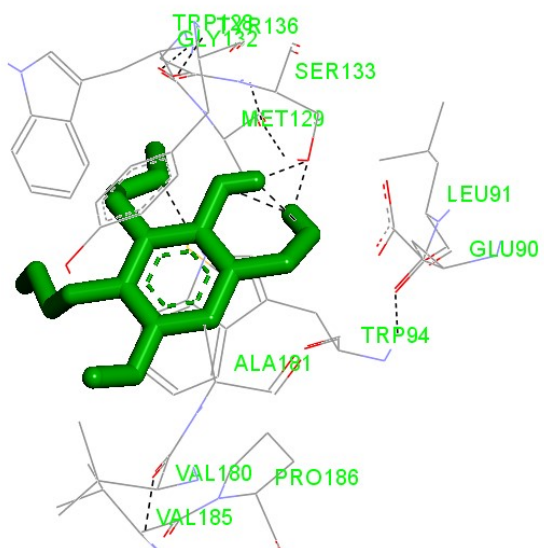

T2R1\_165:

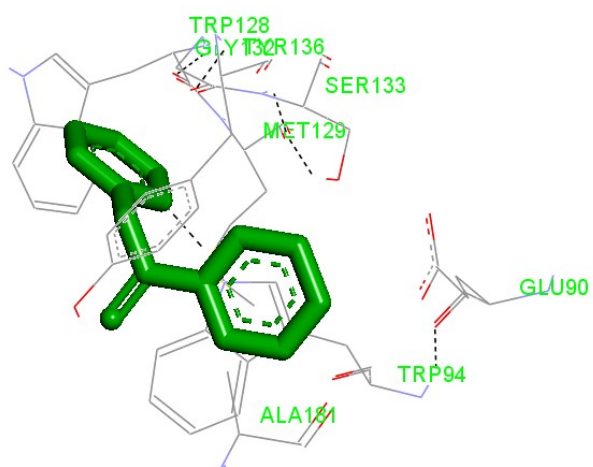

T2R1\_166:

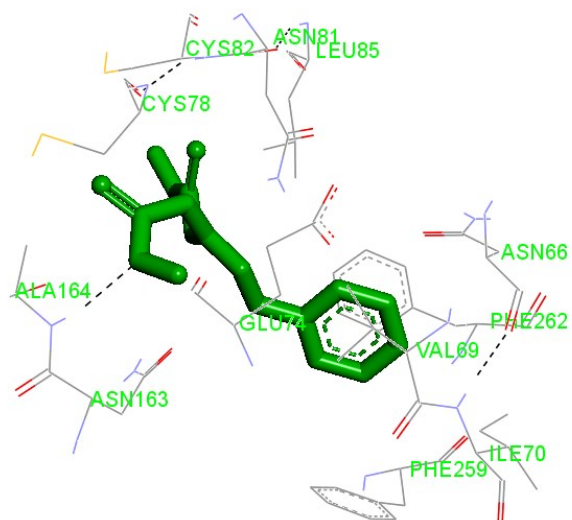

T2R1\_167:

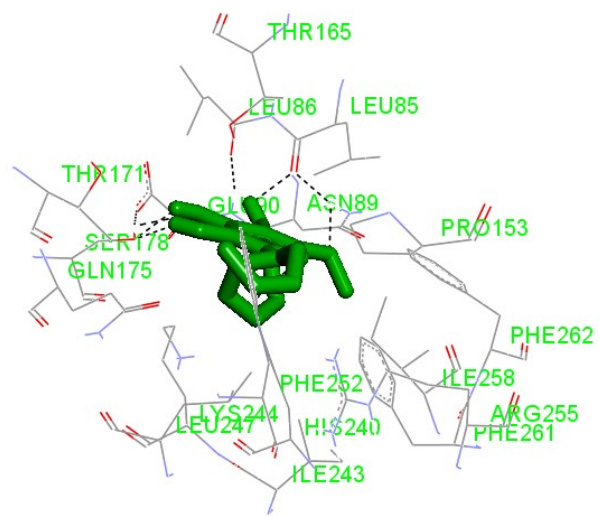

T2R1\_168:

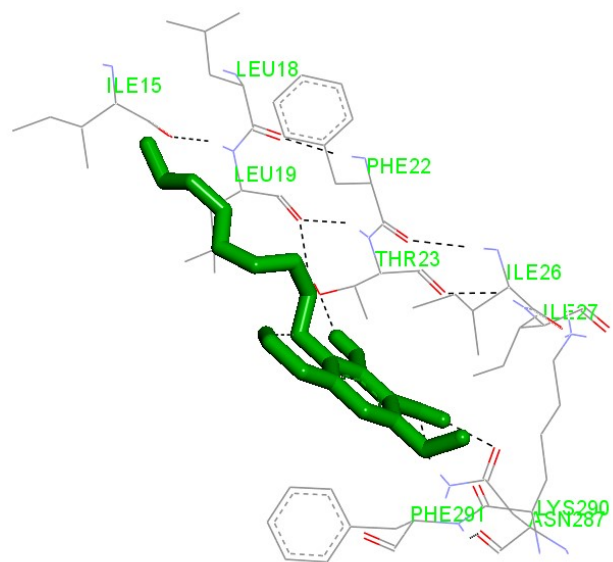

T2R1\_169:

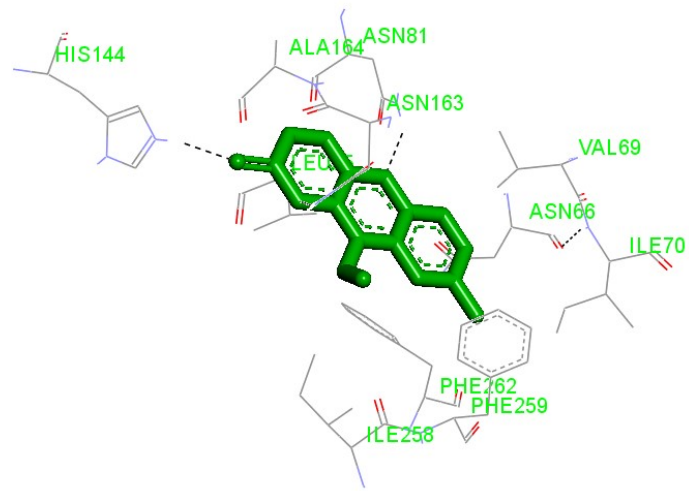

Supplement: d2fo00544a2.pdf [file d2fo00544a2.pdf]
