# Supplementary material for: Identification of novel umami molecules via QSAR models and molecular docking
Source: Royal Society of Chemistry journal article supplement (doi:10.1039/d2fo00544a), 2022-01-01
Supplement: d2fo00544a5.xlsx [file d2fo00544a5.xlsx]

## Sheet: bitter_boruta_descriptors
Feature descriptor	Description	Class
ABC	atom-bond connectivity index	ABCIndex
nAromAtom	aromatic atoms count	Aromatic
nAromBond	aromatic bonds count
nH	number of H atoms	AtomCount
nC	number of C atoms
nN	number of N atoms
nO	number of O atoms
nX	number of halogen atoms
ATS4dv	moreau-broto autocorrelation of lag 4 weighted by valence electrons	Autocorrelation
ATS8dv	moreau-broto autocorrelation of lag 8 weighted by valence electrons
ATS0d	moreau-broto autocorrelation of lag 0 weighted by sigma electrons
ATS1d	moreau-broto autocorrelation of lag 1 weighted by sigma electrons
ATS2d	moreau-broto autocorrelation of lag 2 weighted by sigma electrons
ATS3d	moreau-broto autocorrelation of lag 3 weighted by sigma electrons
ATS4d	moreau-broto autocorrelation of lag 4 weighted by sigma electrons
ATS5d	moreau-broto autocorrelation of lag 5 weighted by sigma electrons
ATS6d	moreau-broto autocorrelation of lag 6 weighted by sigma electrons
ATS7d	moreau-broto autocorrelation of lag 7 weighted by sigma electrons
ATS8d	moreau-broto autocorrelation of lag 8 weighted by sigma electrons
ATS2Z	moreau-broto autocorrelation of lag 2 weighted by atomic number
ATS4Z	moreau-broto autocorrelation of lag 4 weighted by atomic number
ATS5Z	moreau-broto autocorrelation of lag 5 weighted by atomic number
ATS6Z	moreau-broto autocorrelation of lag 6 weighted by atomic number
ATS8Z	moreau-broto autocorrelation of lag 8 weighted by atomic number
ATS0m	moreau-broto autocorrelation of lag 0 weighted by mass
ATS2m	moreau-broto autocorrelation of lag 2 weighted by mass
ATS4m	moreau-broto autocorrelation of lag 4 weighted by mass
ATS5m	moreau-broto autocorrelation of lag 5 weighted by mass
ATS6m	moreau-broto autocorrelation of lag 6 weighted by mass
ATS0v	moreau-broto autocorrelation of lag 0 weighted by vdw volume
ATS1v	moreau-broto autocorrelation of lag 1 weighted by vdw volume
ATS2v	moreau-broto autocorrelation of lag 2 weighted by vdw volume
ATS3v	moreau-broto autocorrelation of lag 3 weighted by vdw volume
ATS4v	moreau-broto autocorrelation of lag 4 weighted by vdw volume
ATS5v	moreau-broto autocorrelation of lag 5 weighted by vdw volume
ATS6v	moreau-broto autocorrelation of lag 6 weighted by vdw volume
ATS7v	moreau-broto autocorrelation of lag 7 weighted by vdw volume
ATS8v	moreau-broto autocorrelation of lag 8 weighted by vdw volume
ATS0p	moreau-broto autocorrelation of lag 0 weighted by polarizability
ATS1p	moreau-broto autocorrelation of lag 1 weighted by polarizability
ATS2p	moreau-broto autocorrelation of lag 2 weighted by polarizability
ATS3p	moreau-broto autocorrelation of lag 3 weighted by polarizability
ATS4p	moreau-broto autocorrelation of lag 4 weighted by polarizability
ATS5p	moreau-broto autocorrelation of lag 5 weighted by polarizability
ATS6p	moreau-broto autocorrelation of lag 6 weighted by polarizability
ATS7p	moreau-broto autocorrelation of lag 7 weighted by polarizability
ATS8p	moreau-broto autocorrelation of lag 8 weighted by polarizability
ATS0i	moreau-broto autocorrelation of lag 0 weighted by ionization potential
ATS1i	moreau-broto autocorrelation of lag 1 weighted by ionization potential
ATS2i	moreau-broto autocorrelation of lag 2 weighted by ionization potential
ATS3i	moreau-broto autocorrelation of lag 3 weighted by ionization potential
ATS4i	moreau-broto autocorrelation of lag 4 weighted by ionization potential
ATS5i	moreau-broto autocorrelation of lag 5 weighted by ionization potential
ATS6i	moreau-broto autocorrelation of lag 6 weighted by ionization potential
ATS7i	moreau-broto autocorrelation of lag 7 weighted by ionization potential
ATS8i	moreau-broto autocorrelation of lag 8 weighted by ionization potential
AATS0dv	averaged moreau-broto autocorrelation of lag 0 weighted by valence electrons
AATS0d	averaged moreau-broto autocorrelation of lag 0 weighted by sigma electrons
AATS0Z	averaged moreau-broto autocorrelation of lag 0 weighted by atomic number
AATS0m	averaged moreau-broto autocorrelation of lag 0 weighted by mass
AATS0v	averaged moreau-broto autocorrelation of lag 0 weighted by vdw volume
AATS0p	averaged moreau-broto autocorrelation of lag 0 weighted by polarizability
AATS0i	averaged moreau-broto autocorrelation of lag 0 weighted by ionization potential
ATSC0dv	centered moreau-broto autocorrelation of lag 0 weighted by valence electrons
ATSC1dv	centered moreau-broto autocorrelation of lag 1 weighted by valence electrons
ATSC2dv	centered moreau-broto autocorrelation of lag 2 weighted by valence electrons
ATSC4dv	centered moreau-broto autocorrelation of lag 4 weighted by valence electrons
ATSC6dv	centered moreau-broto autocorrelation of lag 6 weighted by valence electrons
ATSC0d	centered moreau-broto autocorrelation of lag 0 weighted by sigma electrons
ATSC1d	centered moreau-broto autocorrelation of lag 1 weighted by sigma electrons
ATSC2d	centered moreau-broto autocorrelation of lag 2 weighted by sigma electrons
ATSC3d	centered moreau-broto autocorrelation of lag 3 weighted by sigma electrons
ATSC5d	centered moreau-broto autocorrelation of lag 5 weighted by sigma electrons
ATSC6d	centered moreau-broto autocorrelation of lag 6 weighted by sigma electrons
ATSC0Z	centered moreau-broto autocorrelation of lag 0 weighted by atomic number
ATSC1Z	centered moreau-broto autocorrelation of lag 1 weighted by atomic number
ATSC2Z	centered moreau-broto autocorrelation of lag 2 weighted by atomic number
ATSC3Z	centered moreau-broto autocorrelation of lag 3 weighted by atomic number
ATSC4Z	centered moreau-broto autocorrelation of lag 4 weighted by atomic number
ATSC5Z	centered moreau-broto autocorrelation of lag 5 weighted by atomic number
ATSC6Z	centered moreau-broto autocorrelation of lag 6 weighted by atomic number
ATSC0m	centered moreau-broto autocorrelation of lag 0 weighted by mass
ATSC1m	centered moreau-broto autocorrelation of lag 1 weighted by mass
ATSC2m	centered moreau-broto autocorrelation of lag 2 weighted by mass
ATSC4m	centered moreau-broto autocorrelation of lag 4 weighted by mass
ATSC5m	centered moreau-broto autocorrelation of lag 5 weighted by mass
ATSC6m	centered moreau-broto autocorrelation of lag 6 weighted by mass
ATSC0v	centered moreau-broto autocorrelation of lag 0 weighted by vdw volume
ATSC1v	centered moreau-broto autocorrelation of lag 1 weighted by vdw volume
ATSC2v	centered moreau-broto autocorrelation of lag 2 weighted by vdw volume
ATSC4v	centered moreau-broto autocorrelation of lag 4 weighted by vdw volume
ATSC5v	centered moreau-broto autocorrelation of lag 5 weighted by vdw volume
ATSC6v	centered moreau-broto autocorrelation of lag 6 weighted by vdw volume
ATSC0p	centered moreau-broto autocorrelation of lag 0 weighted by polarizability
ATSC1p	centered moreau-broto autocorrelation of lag 1 weighted by polarizability
ATSC2p	centered moreau-broto autocorrelation of lag 2 weighted by polarizability
ATSC4p	centered moreau-broto autocorrelation of lag 4 weighted by polarizability
ATSC5p	centered moreau-broto autocorrelation of lag 5 weighted by polarizability
ATSC6p	centered moreau-broto autocorrelation of lag 6 weighted by polarizability
ATSC0i	centered moreau-broto autocorrelation of lag 0 weighted by ionization potential
ATSC1i	centered moreau-broto autocorrelation of lag 1 weighted by ionization potential
ATSC2i	centered moreau-broto autocorrelation of lag 2 weighted by ionization potential
ATSC3i	centered moreau-broto autocorrelation of lag 3 weighted by ionization potential
ATSC4i	centered moreau-broto autocorrelation of lag 4 weighted by ionization potential
ATSC5i	centered moreau-broto autocorrelation of lag 5 weighted by ionization potential
ATSC6i	centered moreau-broto autocorrelation of lag 6 weighted by ionization potential
AATSC0dv	averaged and centered moreau-broto autocorrelation of lag 0 weighted by valence electrons
AATSC0d	averaged and centered moreau-broto autocorrelation of lag 0 weighted by sigma electrons
AATSC0Z	averaged and centered moreau-broto autocorrelation of lag 0 weighted by atomic number
AATSC0m	averaged and centered moreau-broto autocorrelation of lag 0 weighted by mass
AATSC0v	averaged and centered moreau-broto autocorrelation of lag 0 weighted by vdw volume
AATSC0p	averaged and centered moreau-broto autocorrelation of lag 0 weighted by polarizability
AATSC0i	averaged and centered moreau-broto autocorrelation of lag 0 weighted by ionization potential
BalabanJ	Balaban's J index	BalabanJ
BertzCT	Bertz CT	BertzCT
nBonds	number of all bonds in non-kekulized structure	BondCount
nBondsS	number of single bonds in non-kekulized structure
nBondsA	number of aromatic bonds in non-kekulized structure
nBondsM	number of multiple bonds in non-kekulized structure
nBondsKD	number of double bonds in kekulized structure
C2SP2	SP2 carbon bound to 2 other carbons	CarbonTypes
C2SP3	SP3 carbon bound to 2 other carbons
Xch-6d	6-ordered Chi chain weighted by sigma electrons	Chi
Xc-5d	5-ordered Chi cluster weighted by sigma electrons
Xc-6d	6-ordered Chi cluster weighted by sigma electrons
Xc-5dv	5-ordered Chi cluster weighted by valence electrons
Xpc-4d	4-ordered Chi path-cluster weighted by sigma electrons
Xpc-5d	5-ordered Chi path-cluster weighted by sigma electrons
Xpc-6d	6-ordered Chi path-cluster weighted by sigma electrons
Xpc-4dv	4-ordered Chi path-cluster weighted by valence electrons
Xpc-5dv	5-ordered Chi path-cluster weighted by valence electrons
Xpc-6dv	6-ordered Chi path-cluster weighted by valence electrons
Xp-1d	1-ordered Chi path weighted by sigma electrons
Xp-2d	2-ordered Chi path weighted by sigma electrons
Xp-4d	4-ordered Chi path weighted by sigma electrons
Xp-5d	5-ordered Chi path weighted by sigma electrons
Xp-6d	6-ordered Chi path weighted by sigma electrons
Xp-7d	7-ordered Chi path weighted by sigma electrons
Xp-1dv	1-ordered Chi path weighted by valence electrons
Xp-2dv	2-ordered Chi path weighted by valence electrons
Xp-3dv	3-ordered Chi path weighted by valence electrons
Xp-4dv	4-ordered Chi path weighted by valence electrons
Xp-5dv	5-ordered Chi path weighted by valence electrons
Xp-6dv	6-ordered Chi path weighted by valence electrons
Xp-7dv	7-ordered Chi path weighted by valence electrons
Sv	sum of constitutional weighted by vdw volume	Constitutional
Sp	sum of constitutional weighted by polarizability
Si	sum of constitutional weighted by ionization potential
MZ	mean of constitutional weighted by atomic number
Mm	mean of constitutional weighted by mass
Mv	mean of constitutional weighted by vdw volume
Mp	mean of constitutional weighted by polarizability
Mi	mean of constitutional weighted by ionization potential
NaaCH	number of aaCH	EState
NaaaC	number of aaaC
NaaN	number of aaN
NsOH	number of sOH
NssO	number of ssO
SsCH3	sum of sCH3
SssCH2	sum of ssCH2
SaaCH	sum of aaCH
SsssCH	sum of sssCH
SaasC	sum of aasC
SssNH	sum of ssNH
SaaN	sum of aaNH
SsssN	sum of sssNH
SsOH	sum of sOH
SdO	sum of dO
SssO	sum of ssO
ECIndex	eccentric connectivity index	EccentricConnectivityIndex
fragCpx	fragment complexity	FragmentComplexity
fMF	molecular framework ratio	Framework
nHBDon	number of hydrogen bond donor	HydrogenBond
IC0	0-ordered neighborhood information content	InformationContent
IC1	1-ordered neighborhood information content
IC4	4-ordered neighborhood information content
IC5	5-ordered neighborhood information content
TIC0	0-ordered neighborhood total information content
TIC1	1-ordered neighborhood total information content
TIC2	2-ordered neighborhood total information content
TIC3	3-ordered neighborhood total information content
TIC4	4-ordered neighborhood total information content
CIC0	0-ordered complementary information content
CIC1	1-ordered complementary information content
CIC3	3-ordered complementary information content
CIC4	4-ordered complementary information content
CIC5	5-ordered complementary information content
MIC0	0-ordered modified information content
MIC1	1-ordered modified information content
MIC2	2-ordered modified information content
ZMIC1	1-ordered Z-modified information content
ZMIC2	2-ordered Z-modified information content
ZMIC3	3-ordered Z-modified information content
ZMIC4	4-ordered Z-modified information content
ZMIC5	5-ordered Z-modified information content
VMcGowan	McGowan volume	McGowanVolume
LabuteASA	Labute's Approximate Surface Area	MoeType
PEOE_VSA1	MOE Charge VSA Descriptor 1 (-inf < x < -0.30)
PEOE_VSA7	MOE Charge VSA Descriptor 7 (-0.05 <= x < 0.00)
PEOE_VSA8	MOE Charge VSA Descriptor 8 ( 0.00 <= x < 0.05)
PEOE_VSA9	MOE Charge VSA Descriptor 9 ( 0.05 <= x < 0.10)
PEOE_VSA10	MOE Charge VSA Descriptor 10 ( 0.10 <= x < 0.15)
SMR_VSA1	MOE MR VSA Descriptor 1 (-inf < x < 1.29)
SMR_VSA3	MOE MR VSA Descriptor 3 ( 1.82 <= x < 2.24)
SMR_VSA5	MOE MR VSA Descriptor 5 ( 2.45 <= x < 2.75)
SMR_VSA6	MOE MR VSA Descriptor 6 ( 2.75 <= x < 3.05)
SMR_VSA7	MOE MR VSA Descriptor 7 ( 3.05 <= x < 3.63)
SlogP_VSA1	MOE logP VSA Descriptor 1 (-inf < x < -0.40)
SlogP_VSA2	MOE logP VSA Descriptor 2 (-0.40 <= x < -0.20)
SlogP_VSA3	MOE logP VSA Descriptor 3 (-0.20 <= x < 0.00)
SlogP_VSA5	MOE logP VSA Descriptor 5 ( 0.10 <= x < 0.15)
SlogP_VSA6	MOE logP VSA Descriptor 6 ( 0.15 <= x < 0.20)
SlogP_VSA8	MOE logP VSA Descriptor 8 ( 0.25 <= x < 0.30)
EState_VSA1	EState VSA Descriptor 1 (-inf < x < -0.39)
EState_VSA9	EState VSA Descriptor 9 ( 4.69 <= x < 9.17)
EState_VSA10	EState VSA Descriptor 10 ( 9.17 <= x < 15.00)
VSA_EState1	VSA EState Descriptor 1 (-inf < x < 4.78)
VSA_EState2	VSA EState Descriptor 2 ( 4.78 <= x < 5.00)
VSA_EState3	VSA EState Descriptor 3 ( 5.00 <= x < 5.41)
VSA_EState4	VSA EState Descriptor 4 ( 5.41 <= x < 5.74)
VSA_EState6	VSA EState Descriptor 6 ( 6.00 <= x < 6.07)
VSA_EState7	VSA EState Descriptor 7 ( 6.07 <= x < 6.45)
VSA_EState8	VSA EState Descriptor 8 ( 6.45 <= x < 7.00)
VSA_EState9	VSA EState Descriptor 9 ( 7.00 <= x < 11.00)
MPC3	3-ordered path count	PathCount
MPC4	4-ordered path count
MPC5	5-ordered path count
MPC6	6-ordered path count
MPC7	7-ordered path count
MPC8	8-ordered path count
MPC9	9-ordered path count
MPC10	10-ordered path count
TMPC10	10-ordered total path count
piPC1	1-ordered pi-path count (log scale)
piPC2	2-ordered pi-path count (log scale)
piPC3	3-ordered pi-path count (log scale)
piPC4	4-ordered pi-path count (log scale)
piPC5	5-ordered pi-path count (log scale)
piPC6	6-ordered pi-path count (log scale)
piPC7	7-ordered pi-path count (log scale)
piPC8	8-ordered pi-path count (log scale)
piPC9	9-ordered pi-path count (log scale)
piPC10	10-ordered pi-path count (log scale)
TpiPC10	10-ordered total pi-path count (log scale)
apol	atomic polarizability	Polarizability
bpol	bond polarizability
nRing	ring count	RingCount
nHRing	hetero ring count
naRing	aromatic ring count
naHRing	aromatic hetero ring count
n6aHRing	6-membered aromatic hetero ring count
nFRing	fused hetero ring count
nFaRing	aromatic fused ring count
nFaHRing	aromatic fused hetero ring count
nRot	rotatable bonds count	RotatableBond
SLogP	Wildman-Crippen LogP	SLogP
SMR	Wildman-Crippen MR
TopoPSA(NO)	topological polar surface area (use only nitrogen and oxygen)	TopoPSA
TopoPSA	topological polar surface area
GGI3	3-ordered raw topological charge	TopologicalCharge
GGI4	4-ordered raw topological charge
GGI5	5-ordered raw topological charge
GGI8	8-ordered raw topological charge
GGI9	9-ordered raw topological charge
GGI10	10-ordered raw topological charge
JGI3	3-ordered mean topological charge
JGI6	6-ordered mean topological charge
JGI9	9-ordered mean topological charge
JGI10	10-ordered mean topological charge
Diameter	topological diameter	TopologicalIndex
Radius	topological radius
MWC03	walk count (leg-3)	WalkCount
MWC04	walk count (leg-4)
MWC05	walk count (leg-5)
MWC06	walk count (leg-6)
MWC07	walk count (leg-7)
MWC08	walk count (leg-8)
MWC09	walk count (leg-9)
MWC10	walk count (leg-10)
TMWC10	total walk count (leg-10)
SRW02	walk count (leg-2, only self returning walk)
SRW06	walk count (leg-6, only self returning walk)
SRW08	walk count (leg-8, only self returning walk)
SRW10	walk count (leg-10, only self returning walk)
TSRW10	total walk count (leg-10, only self returning walk)
AMW	averaged molecular weight	Weight
WPath	Wiener index	WienerIndex
