# Supplementary material for: Identification of novel umami molecules via QSAR models and molecular docking
Source: Royal Society of Chemistry journal article supplement (doi:10.1039/d2fo00544a), 2022-01-01
Supplement: d2fo00544a6.xlsx [file d2fo00544a6.xlsx]

## Sheet: Sheet1
Number	CID	Docking energy (kcal/mol)
		with bitter receptor	with sweet receptor
1	8038	-4.04	-4.41
2	31276	-4.55	-5.11
3	7165	-4.9	-4.9
4	998	-4.03	-4.6
5	7590	-4.8	-5.41
6	7361	-4.72	-3.96
7	240	-5.88	-3.69
8	6306	-6.57	-4.39
9	6305	-7.48	-5.28
10	12649661	-4	-4.5
11	99289	-4.98	-4.49
12	6287	-5.21	-4.45
13	6322	-4	-6.08
14	872	-3.52	-3.85
15	548198	-7.3	-8.57
16	15631736	-9.68	-9.6
17	13370040	-9.1	-9.41
18	13370038	-8.35	-3.51
19	314523	-8.49	-6.97
20	13370031	-9.47	-9
21	13370036	-9.79	-9.32
22	5143	-5.87	-5.5
23	3426	-4.98	-5.36
24	5066234	-5.41	-4.75
25	11520	-4.31	-3.45
26	10130117	-4.8	-4.08
27	10695769	-4.39	-3.26
28	10814292	-3.27	-2.52
29	11030343	-5.07	-4.19
30	11060630	-7.75	-5.33
31	11062926	-5.46	-4.44
32	11418100	-4.56	-3.48
33	12310779	-3.88	-2.63
34	12312896	-4.79	-4.37
35	12312898	-4.73	-4.35
36	16213095	-5.88	-4.85
37	18246898	-7.39	-4.35
38	18247456	-4.13	-5.75
39	18247855	-5.04	-3.65
40	18249371	-4.33	-1.85
41	18606872	-5.74	-3.72
42	18658630	-4.9	-3.97
43	20054865	-5.21	-4.87
44	20764116	-4.69	-4.18
45	21155587	-4.68	-4.3
46	21158721	-3.21	-4.31
47	21352015	-4.68	-2.82
48	21671833	-4.75	-4.57
49	21671861	-5.52	-4.03
50	21671862	-4.64	-4.12
51	21673228	-1.18	-4.17
52	21847333	-0.96	-0.88
53	24744895	-4.77	-2.3
54	441417	-4.72	-4.23
55	441420	-4.74	-4.24
56	44208031	-4.76	-3.94
57	444855	-4.78	-4.32
58	445011	-4.74	-4.17
59	4469129	-3.93	-4.29
60	4479098	-4.86	-4.11
61	5316275	-4.85	-5.92
62	5320271	-4.98	-5.85
63	12302835	-7.33	-5.46
64	3003	-9.05	-6.45
65	2975	-7.05	-8.06
66	220520	-7.67	-6.45
67	5645	-7.46	-7.29
68	4457489	-5.53	-7.7
69	17520	-4.46	-5.1
70	27290	-4.25	-4.8
71	191	-5.56	-5.53
72	13362146	-7.24	-4.27
73	630532	-5.99	-7.96
74	96814	-6.68	-5.66
75	313297	-4.37	-5.49
76	3788736	-7.87	-3.87
77	3515878	-7.75	-7.4
78	3512644	-5.26	-7.31
79	9814075	-4.99	-4.35
80	151464	-10.47	-5.38
81	14162549	-7.2	-8.74
82	12004532	-5.62	-7.03
83	316641	-7.18	-5.07
84	345721	-6.54	-5.96
85	353794	-4.67	-6.89
86	430654	-4.58	-4.92
87	5145	-7.34	-3.88
88	5304	-7.87	-6.48
89	232990	-5.64	-8.84
90	3536732	-6.99	-7.17
91	425	-5.47	-6.95
92	1513138	-7.05	-5.06
93	2729834	-7.33	-6.23
94	252074	-7.36	-7.27
95	5281614	-6.42	-8.1
96	318292	-6.99	-5.32
97	9818067	-7.3	-5.04
98	54039925	-5.88	-6.84
99	9921731	-3.8	-5.79
100	10084837	-5.15	-5.61
101	10086485	-4.28	-5.43
102	10333678	-5.35	-6.39
103	10333679	-4.89	-5.09
104	10357811	-4.43	-4.07
105	10651256	-3.43	-4.02
106	10914184	-7.17	-6.39
107	10936097	-6.5	-6.35
108	10938531	-3.28	-2.7
109	10977693	-5.16	-5.67
110	10979132	-6.91	-6.5
111	10979133	-7.46	-6.54
112	10982819	-4.74	-3.77
113	11044462	-6.91	-6.21
114	11045418	-7.12	-6.66
115	11045419	-6.32	-6.39
116	11057392	-2.42	-1.77
117	11111355	-4.88	-3.33
118	11130997	-6.92	-5.94
119	11334467	-5.84	-6.44
120	704002	-6.07	-5.47
121	11417938	-5.05	-3.8
122	11459635	-5.86	-6.34
123	11782179	-6.82	-6.13
124	11959967	-5.92	-5.26
125	12003173	-6.38	-5.51
126	12765315	-6.27	-7.49
127	12898223	-6.7	-6.17
128	12914615	-5.82	-5.36
129	13269703	-5.35	-5.04
130	13365369	-2.5	-2.76
131	13844864	-6.92	-6.09
132	13844865	-6.52	-5.6
133	13844867	-6.4	-5.77
134	14162553	-10.73	-9.53
135	14409732	-6.26	-5.46
136	14493340	-6.31	-5.69
137	14493341	-6.2	-5.21
138	14625414	-6.93	-6.52
139	16104182	-7.37	-6.54
140	16215116	-6.91	-6.45
141	16663874	-6.53	-6.07
142	16728280	-5.77	-6.43
143	18223932	-4.33	-3.08
144	18340876	-6.37	-6.66
145	18350600	-5.7	-5.7
146	18398597	-5.68	-6.25
147	18471261	-5.71	-6.04
148	18649049	-3.18	-3.64
149	18662833	-7.21	-6.35
150	19025158	-4.29	-3.41
151	20139821	-6.09	-5.52
152	20708704	-4.26	-3.52
153	20764115	-5.66	-5.65
154	20793104	-4.88	-3.93
155	21026819	-6.98	-6.48
156	21189366	-4.77	-5.22
157	21304745	-6.44	-6.49
158	21352019	-3.61	-3.06
159	21452266	-5.72	-6.18
160	21494654	-6.02	-6.3
161	21607387	-7.17	-6.13
162	21630543	-4.55	-4.49
163	21633043	-4.38	-2.8
164	21633044	-4.29	-2.76
165	21682385	-5.69	-6.37
166	21699729	-5.57	-5.85
167	21726858	-4.2	-4.88
168	21726859	-4.33	-4.25
169	22212824	-5.91	-5.61
